1           **Adaptive evolution of feed-forward**  
2           **loops versus diamonds to filter out**  
3           **short spurious signals**

4

5   **Short title:** Adaptive evolution of feed-forward loops and alternatives to them

6

7                   Kun Xiong<sup>1</sup>, Alex K. Lancaster<sup>2</sup>, Mark L. Siegal<sup>3</sup>, Joanna Masel<sup>4\*</sup>

8

9   <sup>1</sup> Department of Molecular and Cellular Biology, University of Arizona, Tucson, Arizona, United  
10 States of America

11   <sup>2</sup> Ronin Institute, Montclair, New Jersey, United States of America

12   <sup>3</sup> Center for Genomics and Systems Biology, Department of Biology, New York University, New  
13 York, New York, United States of America

14   <sup>4</sup> Department of Ecology and Evolutionary Biology, University of Arizona, Tucson, Arizona,  
15 United States of America

16

17   \* Corresponding author

18   Email: [masel@email.arizona.edu](mailto:masel@email.arizona.edu)

19

20

## 21 **Abstract**

22 Transcriptional regulatory networks (TRNs) are enriched for certain network motifs. This could  
23 either be the result of natural selection for particular hypothesized functions of those motifs, or  
24 it could be a byproduct of mutation (e.g. of the prevalence of gene duplication) and of less  
25 specific forms of selection. We have developed a powerful new method for distinguishing  
26 between adaptive vs. non-adaptive causes, by simulating TRN evolution under different  
27 conditions. We simulate mutations to transcription factor binding sites in enough mechanistic  
28 detail to capture the high prevalence of weak-affinity binding sites, which can complicate the  
29 scoring of motifs. Our simulation of gene expression is also highly mechanistic, capturing  
30 stochasticity and delays in gene expression that distort external signals and intrinsically generate  
31 noise. We use the model to study a well-known motif, the type 1 coherent feed-forward loop  
32 (C1-FFL), which is hypothesized to filter out short spurious signals. We found that functional C1-  
33 FFLs evolve readily in TRNs under selection for this function, but not in a variety of negative  
34 controls. Interestingly, a new “diamond” motif also emerged as a short spurious signal filter. Like  
35 the C1-FFL, the diamond integrates information from a fast pathway and a slow pathway, but  
36 their speeds are based on gene expression dynamics rather than topology. When there is no  
37 external spurious signal to filter out, but only internally generated noise, only the diamond and  
38 not the C1-FFL evolves.

39

## 40 **Author Summary**

41 Frequently occurring motifs are thought to be fundamental building blocks of biological  
42 networks, conducting specific functions. However, we still lack definitive evidence that these  
43 motifs have evolved “adaptively” (to perform the particular function proposed for them), rather

44 than “non-adaptively” (as byproducts of some other function, or as an artifact of patterns of  
45 mutations). Here we develop a powerful null model that captures important non-adaptive  
46 factors that can shape the evolution of transcriptional regulatory networks, and use it to provide  
47 the missing piece of evidence of adaptive origin in the case of the most studied motif, a feed-  
48 forward loop that is hypothesized to filter out short spurious signals. We also find evidence for  
49 an alternative solution to this problem, where the functionality of the feed-forward loop is  
50 encoded not in network topology, but in the dynamics of gene expression. Our model is suitable  
51 for studying whether other network features have evolved adaptively vs. non-adaptively.

## 52 Introduction

53 Transcriptional regulatory networks (TRNs) are integral to development and physiology, and  
54 underlie all complex traits. An intriguing finding about TRNs is that certain “motifs” of  
55 interconnected transcription factors (TFs) are over-represented relative to random re-wirings  
56 that preserve the frequency distribution of connections [1, 2]. The significance of this finding  
57 remains open to debate.

58

59 The canonical example is the feed-forward loop (FFL), in which TF A regulates a target C both  
60 directly, and indirectly via TF B, and no regulatory connections exist in the opposite direction [1-  
61 3]. Each of the three regulatory interactions in a FFL can be either activating or repressing, so  
62 there are eight distinct kinds of FFLs [4; **Fig 1**]. Given the eight frequencies expected from the  
63 ratio of activators to repressors, two of these kinds of FFLs are significantly over-represented  
64 [4]. In this paper, we focus on one of these two over-represented types, namely the type 1  
65 coherent FFL (C1-FFL), in which all three links are activating rather than repressing (**Fig 1**, top  
66 left). C1-FFL motifs are an active part of systems biology research today, e.g. they are used to  
67 infer the function of specific regulatory pathways [5, 6].

68

69 The over-representation of FFLs in observed TRNs is normally explained in terms of selection  
70 favoring a function of FFLs. Specifically, the most common adaptive hypothesis for the over-  
71 representation of C1-FFLs is that cells often benefit from ignoring short-lived signals and  
72 responding only to durable signals [3, 4, 7]. Evidence that C1-FFLs can perform this function  
73 comes from the behavior both of theoretical models [4] and of *in vivo* gene circuits [7]. A C1-FFL  
74 can achieve this function when its regulatory logic is that of an “AND” gate, i.e. both the direct  
75 path from A to C and the indirect path from A to B to C must be activated before the response is

76 triggered. In this case, the response will only be triggered if, by the time the signal trickles  
77 through the longer path, it is still active on the shorter path as well. This yields a response to  
78 long-lived signals but not short-lived signals.

79

80 However, just because a behavior is observed, we cannot conclude that the behavior is a  
81 historical consequence of past selection favoring that behavior [8, 9]. The explanatory power of  
82 this adaptive hypothesis of filtering out short-lived and spurious signals needs to be compared  
83 to that of alternative, non-adaptive hypotheses [10]. The over-representation of C1-FFLs might  
84 be a byproduct of some other behavior that was the true target of selection [11]. Alternatively,  
85 it might be an intrinsic property of TRNs generated by mutational processes – gene duplication  
86 patterns have been found to enrich for FFLs in general [12], although not yet C1-FFLs in  
87 particular. Adaptationist claims about TRN organization have been accused of being just-so  
88 stories, with adaptive hypotheses still in need of testing against an appropriate null model of  
89 network evolution [13-23].

90

91 Here we develop such a computational null model of TRN evolution, and apply it to the case of  
92 C1-FFL over-representation. We simulate gene duplication and deletion, and sufficient realism in  
93 our model of cis-regulatory evolution to capture the non-adaptive effects of mutation in shaping  
94 TRNs. In particular, we consider “weak” TF binding sites (TFBSs) that can easily appear de novo  
95 by chance alone, and from there be selected to bind a TF more strongly.

96

97 It is also important to capture the stochasticity of gene expression, which causes the number of  
98 mRNAs and hence proteins to fluctuate [24, 25]. This is because demand for spurious signal  
99 filtering and hence C1-FFL function may arise not just from external signals, but also from

100 internal fluctuations. Stochasticity in gene expression also shapes how external spurious signals  
101 are propagated. Stochasticity is a constraint on what TRNs can achieve, but can be adaptively  
102 co-opted in evolution [26]; either way, it might underlie the evolution of certain motifs. Most  
103 computational models of TRN evolution that consider gene expression as the major phenotype  
104 do not simulate stochasticity in gene expression (see [27-29] for three notable exceptions). The  
105 genotype to phenotype map we develop here does include intrinsic stochasticity in gene  
106 expression.

107

108 Here we use this model to ask whether AND-gated C1-FFLs evolve as a response to selection for  
109 filtering out short and spurious external signals, compared to conditions that control for both  
110 mutational biases and for less specific forms of selection. We find that they evolve far more  
111 often under these specific selection conditions than under control conditions, providing long-  
112 awaited support for the adaptive hypothesis. We also ask whether there are alternative motifs  
113 that evolve to solve the same selective challenge. We find that a “diamond” [30] is such a motif,  
114 filtering out short spurious signals by requiring them to arrive not through both a long and a  
115 short path, but through both a fast and a slow path of equal topological lengths. We also  
116 compare motifs that evolve to filter out external spurious signals to those that evolve in  
117 response to intrinsic stochastic noise in gene expression. We find that while both diamonds and  
118 C1-FFLs evolve in response to the former, only diamonds evolve in response to the latter.

119

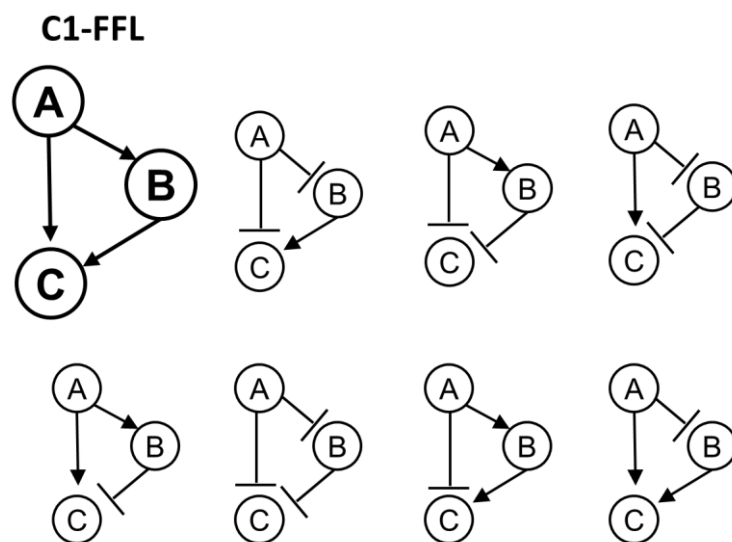

120

121 **Fig 1. Feed-forward loops come in eight subtypes.** TF A and TF B can activate (indicated by  
122 arrows) or repress (indicated by bars) expression of the effector C as well as other TFs. Auto-  
123 regulation is allowed, but not shown. Following Milo et al. [1], we exclude the case in which A  
124 and B regulate one another, rather than treating this case as two overlapping FFLs.

## 125 **Models**

### 126 **Overview of the model**

127 We simulate the dynamics of TRNs as the TFs activate and repress one another's transcription.  
128 For each moment in developmental time (i.e. on the timescale of one cell responding to stimuli),  
129 we simulate the numbers of nuclear and cytoplasmic mRNAs in a cell, the protein  
130 concentrations, and the chromatin state of each transcription start site. Transitions between  
131 three possible chromatin states -- Repressed, Intermediate, and Active -- are a stochastic  
132 function of TF binding, and transcription initiation from the Active state is also stochastic. An  
133 overview of the model is shown in **Fig 2**. The pattern of TF binding affects chromatin, which  
134 affects transcription rates, eventually affecting the concentration of TFs and so completing  
135 regulatory feedback loops. The genotype is specified by a set of cis-regulatory sequences that  
136 contain TFBSs to which TFs may bind (which, as nucleotide sequences, are subject to realistic  
137 mutational parameters), by which consensus sequence each TF recognizes and with what  
138 affinity, and by 5 gene-specific parameters that control gene expression as a function of TF  
139 binding: mean duration of transcriptional bursts, mRNA degradation, protein production, and  
140 protein degradation rates, and gene length which affects delays in transcription and translation.  
141 An external signal is treated like another TF, and the concentration of an effector gene in  
142 response is a primary determinant of fitness, combined with a cost associated with gene  
143 expression (**Fig 2**). Mutants replace resident genotypes as a function of the difference in  
144 estimated fitness. Parameter values, taken as far as possible from *Saccharomyces cerevisiae*, are  
145 summarized in **Table 1**. Source code in C is available at [https://github.com/MaselLab/network-](https://github.com/MaselLab/network-evolution-simulator)  
146 [evolution-simulator](https://github.com/MaselLab/network-evolution-simulator).

147



148

**Table 1. Major model parameters**

| Parameter                                                                          | Values <sup>[1]</sup>                                                                          | Bounds <sup>[2]</sup>        | References                                                      |
|------------------------------------------------------------------------------------|------------------------------------------------------------------------------------------------|------------------------------|-----------------------------------------------------------------|
| Length of cis-regulatory sequence                                                  | 150 bp                                                                                         |                              | [31]                                                            |
| Length of TF recognition sequence                                                  | 8 bp                                                                                           |                              | [32]                                                            |
| Length occupied by a TF on each side of recognition sequence                       | 3 bp                                                                                           |                              | [34]                                                            |
| Dissociation constant between TF and perfect TFBS, $K_d(0)$                        | <b><math>10^{U(-9,-6)} \text{ M}^{[3]}</math></b>                                              | (0, $10^{-5}$ )              | [37, 38]                                                        |
| Dissociation constant between TF and non-specific DNA, $K_d(3)$                    | $10^{-5} \text{ M}$                                                                            |                              | [33]                                                            |
| Base rate of transition from Repressed to Intermediate                             | $0.15 \text{ min}^{-1}$                                                                        |                              | [44]                                                            |
| Maximum transition rate from Repressed to Intermediate                             | $0.92 \text{ min}^{-1}$                                                                        |                              | [40, 44]                                                        |
| Base rate of transition from Intermediate to Repressed                             | $0.67 \text{ min}^{-1}$                                                                        |                              | [44]                                                            |
| Maximum transition rate from Intermediate to Repressed                             | $4.11 \text{ min}^{-1}$                                                                        |                              | Chosen to give same dynamic range and Repressed to Intermediate |
| Base rate of transition from Intermediate to Active                                | $0.025 \text{ min}^{-1}$                                                                       |                              | [40]                                                            |
| Maximum transition rate from Intermediate to Active                                | $3.3 \text{ min}^{-1}$                                                                         |                              | [40]                                                            |
| Transition rate from Active to Intermediate, $r_{Act\_to\_Int}$                    | <b><math>10^{N(1.27, 0.226)} \text{ min}^{-1[4]}</math></b>                                    | [0.59, 64.7]                 | [40, 49, 50]                                                    |
| Length of gene, $L$                                                                | <b><math>10^{N(2.568, 0.34)}</math></b><br><b>codons</b>                                       | [50, 5000]                   | [79]                                                            |
| Rate of transcription initiation, $r_{max\_transc\_init}$                          | $6.75 \text{ min}^{-1}$                                                                        |                              | [40]                                                            |
| Speed of transcription elongation                                                  | 600 codon/min                                                                                  |                              | [51, 80, 81]                                                    |
| Time for transcribing UTRs and for terminating transcription                       | 1 min                                                                                          |                              | [51, 80, 81]                                                    |
| Rate of mRNA degradation, $r_{mRNA\_deg}$                                          | <b><math>10^{N(-1.49, 0.267)} \text{ min}^{-1}</math></b>                                      | $[7.5 \times 10^{-4}, 0.54]$ | [82]                                                            |
| Speed of translation elongation                                                    | 330 codon/min                                                                                  |                              | [55]                                                            |
| Translation initiation time                                                        | 0.5 min                                                                                        |                              | [55]                                                            |
| Protein synthesis rate, $r_{protein\_syn}$                                         | <b><math>10^{N(0.322, 0.416)}</math></b><br><b>molecule mRNA<sup>-1</sup> min<sup>-1</sup></b> | $[4.5 \times 10^{-3}, 61.4]$ | [55]                                                            |
| Rate of protein degradation, $r_{protein\_deg}$                                    | <b><math>10^{N(-1.88, 0.561)} \text{ min}^{-1}</math></b>                                      | $[3.0 \times 10^{-6}, 0.69]$ | [83]                                                            |
| Saturation concentration of effector protein, $N_{e\_sat}$                         | 10,000 molecules/cell                                                                          |                              | [58]                                                            |
| Fitness cost of protein expression for a gene with $L = 10^{2.568}$ , $C_{transl}$ | $2 \times 10^{-6}$ (molecules/min) <sup>-1</sup>                                               |                              | [58, 59]                                                        |
| Maximum number of effector gene copies                                             | 5                                                                                              |                              |                                                                 |
| Maximum number of TF gene copies, excluding the signal                             | 19                                                                                             |                              |                                                                 |

<sup>1</sup> Parameters in bold can be altered by mutation, and the table shows the distributions from which their initial values are sampled. Parameter estimation is described either in the Methods or **S1 Text** section 2-5.

<sup>2</sup> Boundary values use the same unit as the parameter values. Parentheses mean the parameter cannot take the boundary values; brackets mean the opposite. We also use these bounds to constrain mutation (see **S1 Text** section 8).

<sup>3</sup> The uniform distribution is denoted as  $U(\text{min}, \text{max})$ .

<sup>4</sup> The normal distribution is denoted as  $N(\text{mean}, \text{SD})$ .

149

150

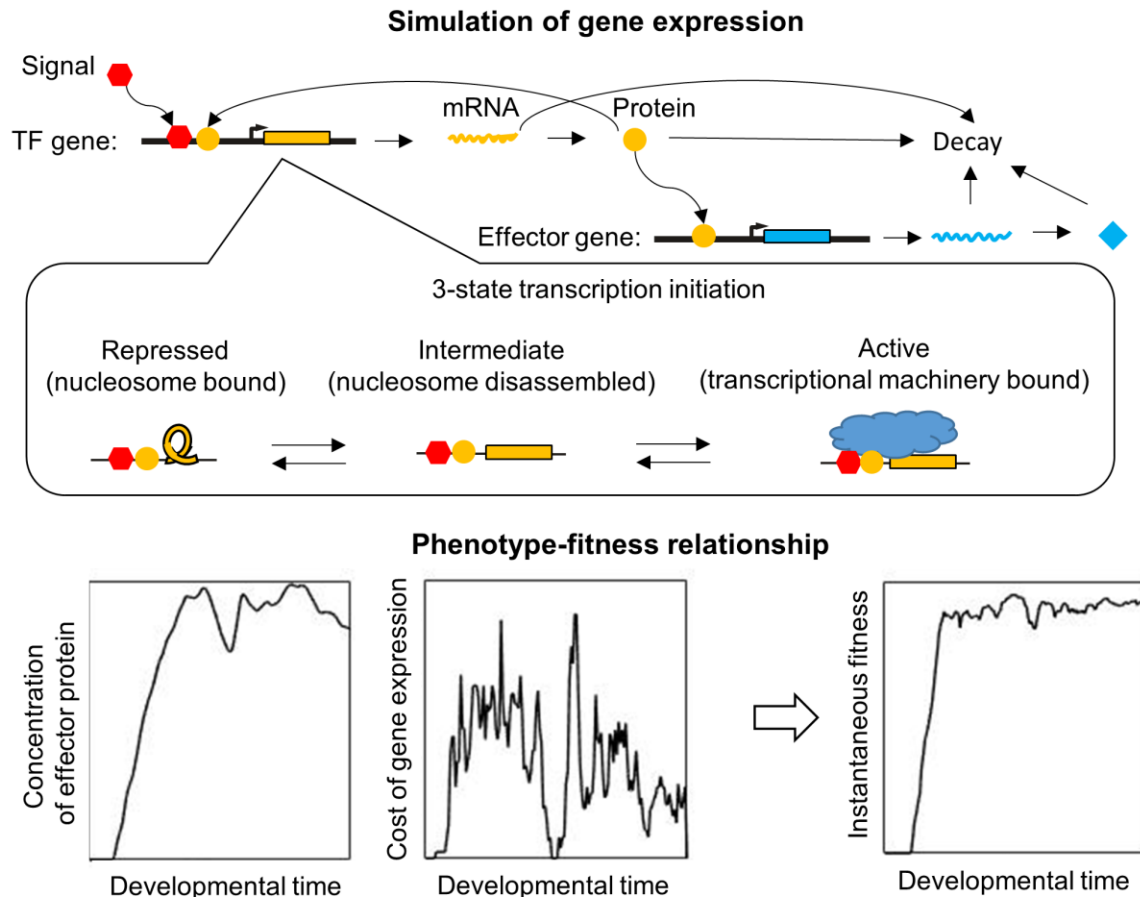

151

152 **Fig 2. Overview of the model.** As an example, we show a simple TRN that contains two genes.

153 Top: major biological processes (arrows) simulated in the model. Bottom: fitness is primarily  
 154 determined by the concentration of an effector protein (here shown as beneficial as in Eq. 2, but  
 155 potentially deleterious in a different environment as in Eq. 3), with a secondary component  
 156 coming from the cost of gene expression (proportional to the rate of protein production),  
 157 combined to give an instantaneous fitness at each moment in developmental time.

158

### 159 **Transcription factor binding**

160 Transcription of each gene is controlled by TFBSs present within a 150-bp cis-regulatory region,  
 161 corresponding to a typical yeast nucleosome-free region within a promoter [31]. The perfect  
 162 TFBS for a typical yeast TF has information content equivalent to 13.8 bits [32]; this means that

163 in a simplified model of binding where only one of the four nucleotides is a good match at each  
164 site, ~7 bp are recognized as an optimal consensus binding site. Maerkl & Quake [33] reported  
165 that the TFBSs of two yeast TFs, Pho4p and Cbf1p, can have up to 2 mismatched sites within  
166 their 6 bp consensus binding sequence, while still binding the TF above background levels [33].  
167 Our model therefore tracks TFBSs with up to 2 mismatches. This low information content  
168 implies a higher density of TFBSs within our cis-regulatory regions than our algorithm was able  
169 to handle, so we instead assigned each TF an 8-bp consensus sequence. Two TFs cannot  
170 simultaneously occupy overlapping stretches, which we assume extend beyond the recognition  
171 sequence to occupy a total of 14 bp [34]; this captures competitive binding. Hindrance between  
172 TFBSs is shown in **Fig 3A**; TFs are assumed to work in both orientations [35].

173

174 Sites with  $m > 3$  mismatches are assumed to still bind at a background rate equal to  $m = 3$   
175 mismatches, with dissociation constant  $K_d(3) = 10^{-5}$  M [33] for all TFs. We assume that each of  
176 the last three bp makes an equal and independent additive contribution  $\Delta G_{bp} < 0$  to the binding  
177 energy [36]: although not always true, this approximates average behavior well [33]. We ignore  
178 cooperativity in binding. Dissociation constants of eukaryotic TFs for perfect TFBSs can range  
179 from  $10^{-5}$  M [37] to  $10^{-11}$  M [38]. We initialize each TF with its own value of  $\log_{10}(K_d(0))$  sampled  
180 from a uniform distribution between -6 and -9, with mutation capable of further expanding this  
181 range, subject to  $K_d(0) < 10^{-5}$  M. Substituting  $m = 0$  and  $m = 3$  into

182

$$183 \quad \Delta G_m = -RT \ln K_d(m) = \Delta G_0 - \min(m, 3) \Delta G_{bp},$$

184

185 we can solve for  $\Delta G_{bp}$  and  $\Delta G_0$ , and thus obtain  $K_d(1)$  and  $K_d(2)$ .

186

187 Because TFs bind non-specifically to DNA at a high background rate, each nucleosome-free  
188 stretch of 14 bp can be considered to be a non-specific binding site (NSBS). A haploid *S.*  
189 *cerevisiae* genome is 12 Mb, 80% of which is wrapped in nucleosomes [39], yielding  
190 approximately  $10^6$  potential non-specific binding sites (NSBSs). In a yeast nucleus of volume  
191  $3 \times 10^{-15}$  liters, the NSBS concentration is of order  $10^{-4}$  M. To find the concentration of free TF  
192 [TF] in the nucleus given a total TF concentration of  $C_{TF}$ , we consider

193

$$194 \quad K_d = \frac{[\text{binding\_site}][\text{TF}]}{[\text{binding\_site} \cdot \text{TF}]}$$

195

196 in the context of NSBSs, substitute [TF·NSBS] with  $C_{TF} - [\text{TF}]$ , and solve for

197

$$198 \quad [\text{TF}] = \frac{K_d(3)}{K_d(3) + [\text{NSBS}]} C_{TF} = \frac{10^{-5}}{10^{-5} + 10^{-4}} C_{TF}.$$

199

200 Thus, about 90% of total TFs are bound non-specifically, leaving about 10% free. The relatively  
201 small number of specific TFBSs is not enough to significantly perturb the proportion of free TFs,  
202 and so for the specific TFBSs with  $m < 3$  that are of interest in our model, we simply use  $K_d^*(m) =$   
203  $10K_d(m)$  to account for the reduction in the amount of available TF due to non-specific binding.  
204 We also rescale  $K_d^*$  from moles/liter to the more convenient number of molecules per cell by  
205 multiplying by  $3 \times 10^{-15}$  liter  $\times 6.02 \times 10^{23}$  molecules/mole =  $1.8 \times 10^9$  molecules cell $^{-1}$  M $^{-1}$ , for a  
206 total multiplication factor of  $1.8 \times 10^{10}$  molecule M $^{-1}$ . If there were only one binding site, it would  
207 be bound for a fraction of time

208

$$209 \quad P = \frac{N_i}{K_d^* + N_i} \quad (1)$$

210

211 where  $N_i$  is the per-cell number of molecules of TF  $i$ ; note that we assume all TF molecules are  
 212 located in the nucleus.

213

214 The transition rates between chromatin states (see section below) are a function of the  
 215 numbers of activators  $A$  and repressors  $R$  bound to a cis-regulatory region. Note that in our  
 216 model, each TF is either always an activator, or always a repressor, independently of binding  
 217 context. The joint probability distribution of  $A$  and  $R$  is derived in **S1 Text** section 1.

218

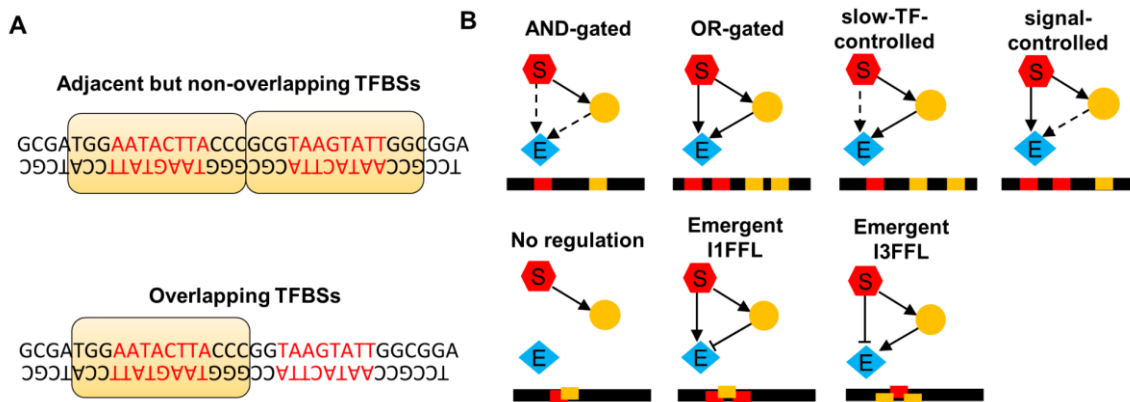

219

220 **Fig 3. The numbers of TFBSs, and any hindrance between them, determines the regulatory**  
 221 **logic of effector expression. (A)** TFs (yellow boxes) recognize 8 bp (red) sites while occupying  
 222 and thus excluding other TFs from a 14 bp long space. The sequence on the top allows  
 223 simultaneous binding but that on the bottom does not. **(B)** We use the pattern of TFBSs (red and  
 224 yellow bars along black cis-regulatory sequences) to classify the regulatory logic of the effector  
 225 gene. C1-FFLs are classified first by whether or not they are capable of simultaneously binding  
 226 the signal and the TF (top vs bottom). Further classification is based on whether either the signal  
 227 or the TF has multiple non-overlapping TFBSs, allowing it to activate the effector without help  
 228 from the other (solid arrow). The three subtypes on the bottom (where the signal and TF cannot

229 bind simultaneously) are rarely seen, and omitted from further analysis; they are shown here for  
230 completeness. I1-FFL and I3-FFL stand for type 1 and type 3 incoherent feed-forward loops,  
231 respectively [7].

232

### 233 **Transcriptional regulation**

234 Activation of the effector gene requires at least two TFBSs to be occupied by activators – not  
235 necessarily different activators. The requirement for two activators makes the effector gene  
236 capable of evolving an AND-gate via a configuration of TFBSs in which the only way to have two  
237 TFs bound is for them to be different TFs (**Fig 3B**). All other genes are AND-gate-incapable,  
238 meaning that their activation requires only one TFBS to be occupied by an activator.  $P_A$  denotes  
239 the probability of having at least one activator bound for an AND-gate-incapable gene, or two  
240 for an AND-gate-capable gene.  $P_R$  denotes the probability of having at least one repressor  
241 bound.

242

243 Noise in yeast gene expression is well described by a two step process of transcriptional  
244 activation [40, 41], e.g. nucleosome disassembly followed by transcription machinery assembly.  
245 We denote the three possible states of the transcription start site as Repressed, Intermediate,  
246 and Active (**Fig 2**). Transitions between the states depend on the numbers of activator and  
247 repressor TFs bound (e.g. via recruitment of histone-modifying enzymes [42, 43]). We make  
248 conversion from Repressed to Intermediate range, as a function of  $P_A$ , from the background rate  
249  $0.15 \text{ min}^{-1}$  of histone acetylation [44; presumed to be followed by nucleosome disassembly], to  
250 the rate of nucleosome disassembly  $0.92 \text{ min}^{-1}$  for the constitutively active PHO5 promoter [40]:

251

$$252 \quad r_{Rep\_to\_Int} = 0.92P_A + 0.15(1 - P_A).$$

253

254 We make conversion from Intermediate to Repressed a function of  $P_R$ , ranging from a  
255 background histone de-acetylation rate of  $0.67 \text{ min}^{-1}$  [44], up to  $4.11 \text{ min}^{-1}$ , with that maximum  
256 chosen so as to keep a similar maximum:basal rate ratio as that of  $r_{Rep\_to\_Int}$ :

257

$$258 \quad r_{Int\_to\_Rep} = 4.11P_R + 0.67(1 - P_R).$$

259

260 We assume that repressors disrupt the assembly of transcription machinery [45] to such a  
261 degree that conversion from Intermediate to Active does not occur if even a single repressor is  
262 bound. In the absence of repressors, activators facilitate the assembly of transcription  
263 machinery [46]. Brown et al. [40] reported that the rate of transcription machinery assembly is  
264  $3.3 \text{ min}^{-1}$  for a constitutively active PHO5 promoter, and  $0.025 \text{ min}^{-1}$  when the Pho4 activator of  
265 the PHO5 promoter is knocked out. We use this range to set

266

$$267 \quad r_{Int\_to\_Act} = 3.3P_{A\_no\_R} + 0.025P_{notA\_no\_R}$$

268

269 where  $P_{A\_no\_R}$  is the probability of having no repressors and either one (for an AND-gate-  
270 incapable gene) or two (for an AND-gate-capable gene) activators bound, and  $P_{notA\_no\_R}$  is the  
271 probability of having no TFs bound (for AND-gate-incapable genes) or having no repressors and  
272 not more than one activator bound (for AND-gate-capable genes).

273

274 The promoter sequence not only determines which specific TFBSs are present, but also  
275 influences non-specific components of the transcriptional machinery [47, 48]. We capture this  
276 via gene-specific but TF-binding-independent rates  $r_{Act\_to\_Int}$  with which the machinery

277 disassembles and a burst of transcription ends. In other words, we let TF binding regulate the  
278 frequency of “bursts” of transcription, while other properties of the cis-regulatory region  
279 regulate their duration. E.g., yeast transcription factor Pho4 regulates the frequency but not  
280 duration of bursts of PHO5 expression, by regulating the rates of nucleosome removal and of  
281 transition to but not from a transcriptionally active state [40]. We estimate the distribution of  
282  $r_{Act\_to\_Int}$  from the observed rates of mRNA production of 255 yeast genes [49] that are likely to  
283 have similarly low nucleosome occupancy [50] and thus are constitutively open to expression  
284 (see **S1 Text** section 2 for details and also for the bounds of  $r_{Act\_to\_Int}$ ). For modeling simplicity, we  
285 assume that the core promoter sequence responsible for the value of  $r_{Act\_to\_Int}$  is distinct from  
286 the 150-bp sequences in which our TFBSs are found.

287

### 288 **mRNA and protein dynamics**

289 Once in the Active state, a gene initiates new transcripts stochastically at rate  $r_{max\_transc\_init} = 6.75$   
290 mRNA/min [40]. There is a delay before transcription is completed, of duration  $1 + L / 600$   
291 minutes, where  $L$  is the length of the ORF in codons (see **S1 Text** section 3).

292

293 We model a second delay between the completion of a transcript and the production of the first  
294 protein from it. The delay comes from a combination of translation initiation and elongation; it  
295 ends when the mRNA is fully loaded with ribosomes all the way through to the stop codon and  
296 the first protein is produced. We ignore the time required for mRNA splicing; introns are rare in  
297 yeast [51]. mRNA transportation from nucleus to cytosol, which is likely diffusion-limited [52,  
298 53], is fast even in mammalian cells [54] let alone much smaller yeast cells, and the time it takes  
299 is also ignored. The median time in yeast for initiating translation is 0.5 minute [Table 1 in 55],  
300 and the genomic average peptide elongation rate is 330 codon/min [55]. After an mRNA is



301 produced, we therefore wait for  $0.5 + L / 330$  minutes, and then model protein production as  
302 continuous at a gene-specific rate  $r_{protein\_syn}$  (see **S1 Text** section 4 for details of  $r_{protein\_syn}$ ).  
303  
304 Protein transport into the nucleus is rapid [56] and is approximated as instantaneous and  
305 complete, so that the newly produced protein molecules immediately increase the probability of  
306 TF binding. Each gene has its own mRNA and protein decay rates, initialized from distributions  
307 taken from data (see **S1 Text** section 5).

308  
309 All the rates regarding transcription and translation are listed in **Table 1**, including distributions  
310 estimated from data, and hard bounds imposed to prevent unrealistic values arising during  
311 evolution.

312

### 313 **Developmental simulation**

314 Our algorithm is part-stochastic, part-deterministic. We use a Gillespie algorithm [57] to  
315 simulate stochastic transitions between Repressed, Intermediate, and Active chromatin states,  
316 and to simulate transcription initiation and mRNA decay events. Fixed (i.e. deterministic) delay  
317 times are simulated between transcription initiation and completion, and between transcript  
318 completion and the production of the first protein. Protein production and degradation are  
319 described deterministically with ODEs, and updated frequently in order to recalculate TF  
320 concentrations and hence chromatin transition rates. We initialize developmental simulations  
321 with no mRNA or protein (except for the signal), and all genes in the Repressed state. Details of  
322 our simulation algorithm are given in the **S1 Text** section 6.

323

### 324 **Selection conditions**

325 Filtering out short spurious signals is a special case of signal recognition more generally. In  
326 environment 1, expressing the effector is beneficial, and in environment 2 it is deleterious. We  
327 select for TRNs that take information from the signal and correctly decide whether to express  
328 the effector. In our control condition, the signal is “on” at a constant level when the effector is  
329 beneficial in environment 1, and off in environment 2. Fitness is a weighted average across  
330 these two environments. In our test condition (**Fig 4**), the signal is constantly on in environment  
331 1 and briefly on (for the first 10 minutes) in environment 2 – selection is to ignore this short  
332 spurious signal. The signal is treated as though it were an activating TF whose concentration is  
333 controlled externally, with an “off” concentration of zero and an “on” concentration of 1,000  
334 molecules per cell, which is the typical per-cell number of a yeast TF [58].

335

336 We make fitness quantitative in terms of a “benefit”  $B(t)$  as a function of the amount of  
337 effector protein  $N_e(t)$  at developmental time  $t$ . Our motivation is the scenario in which the  
338 effector protein directs resources from metabolic program I to II. When program II produces  
339 benefits,

340

341 
$$B(t) = \begin{cases} b_{max} \frac{N_e(t)}{N_{e\_sat}}, & N_e(t) < N_{e\_sat} \\ b_{max}, & N_e(t) \geq N_{e\_sat} \end{cases}, \quad (2)$$

342

343 where  $b_{max}$  is the maximum benefit if all resources were redirected to program II, and  $N_{e\_sat}$  is  
344 the minimum of amount of effector protein to achieve this. Similarly, when program I is  
345 beneficial,

346

$$347 \quad B(t) = \begin{cases} b_{max} - b_{max} \frac{N_e(t)}{N_{e_{sat}}}, & N_e(t) < N_{e_{sat}} \\ 0, & N_e(t) \geq N_{e_{sat}} \end{cases} \quad (3)$$

348

349 We set  $N_{e_{sat}}$  to 10,000 molecules, which is about the average molecule number of a  
350 metabolism-associated protein per cell in yeast [58]. Without loss of generality given that fitness  
351 is relative, we set  $b_{max}$  to 1.

352

353 A second contribution to fitness comes from the cost of gene expression  $C(t)$  (**Fig 2, bottom**  
354 **center**). We make this cost proportional to the total protein production rate. We estimate a  
355 fitness cost of gene expression of  $2 \times 10^{-6}$  per protein molecule translated per minute, based on  
356 the cost of expressing a non-toxic protein in yeast [59; see **S1 Text** section 7 for details].

357

358 We simulate gene expression for 90 minutes of developmental time (**Fig 4**), and calculate  
359 “cellular fitness” in a given environment as the average instantaneous fitness ( $B(t)-C(t)$ ) over  
360 these 90 minutes. We consider environment 2 to be twice as common as environment 1 (a  
361 “signal” should be for an uncommon event rather than the default), and take the appropriate  
362 weighted average.

363

364

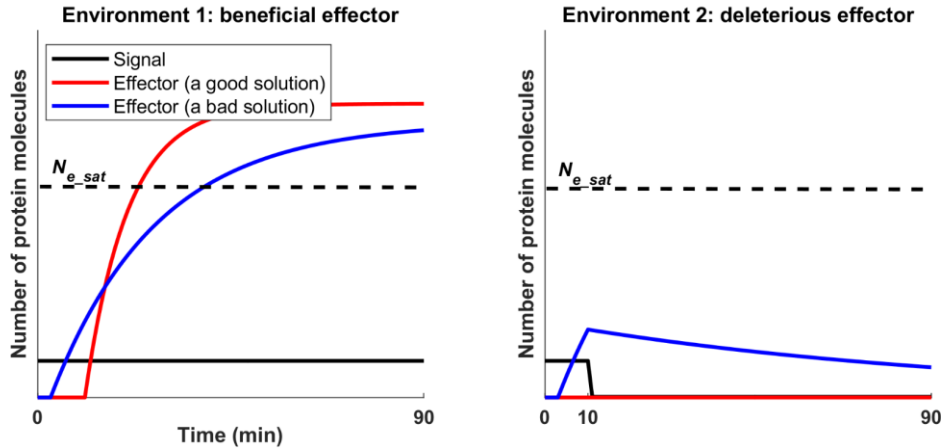

365

366 **Fig 4. Selection for filtering out short spurious signals.** The selection condition contains two  
 367 environments. Each environment is a 90 min simulation of gene expression given signal input  
 368 and the fitness effect of the effector. The signal is shown in black. Red illustrates favorable  
 369 behavior of the effector in each of the environments, and, in comparison, blue shows a poor  
 370 solution. See **S1 Fig** for examples of the evolved phenotypes.

371

### 372 Evolutionary simulation

373 We simulate a novel version of origin-fixation (weak-mutation-strong-selection) evolutionary  
 374 dynamics, i.e. the population contains only one resident genotype at any time, and mutant  
 375 genotypes are either rejected or chosen to be the next resident. Estimators  $\hat{F}$  of genotype  
 376 fitness are averaged over 200 developmental replicates per environment in the case of the  
 377 mutant, plus an additional 800 should it be chosen to be the next resident. The mutant replaces  
 378 the resident if

379

$$380 \frac{\hat{F}_{mutant} - \hat{F}_{resident}}{|\hat{F}_{resident}|} \geq 10^{-8}.$$

381

382 This differs from Kimura's [60] equation for fixation probability, but captures the same flavor;  
383 due to stochasticity in  $\hat{F}$ , fixation probability is a monotonic function of the true difference in  
384 fitness. Note that it is possible, especially at the beginning of an evolutionary simulation, for  
385 relative fitness to be paradoxically negative. In this rare case, for simplicity, we use the absolute  
386 value of  $\hat{F}$  on the denominator.

387

388 If 2000 successive mutants are all rejected, the simulation is terminated; upon inspection, we  
389 found that these resident genotypes had evolved to not express the effector in either  
390 environment. We refer to each change in resident genotype as an evolutionary step. We stop  
391 the simulation after 50,000 evolutionary steps; at this time, most replicate simulations seem to  
392 have reached a fitness plateau (**S2 Fig**); we use all replicates except those terminated early. To  
393 reduce the frequency of early termination in the case where the signal was not allowed to  
394 directly regulate the effector, we used a burn-in phase selecting on a more accessible  
395 intermediate phenotype (see **S1 Text** section 9). In this case, burn-in occurred for 1000  
396 evolutionary steps, followed by the usual 50,000 evolutionary steps with selection for the  
397 phenotype of interest (**S2 Fig**).

398

### 399 **Genotype Initialization**

400 We initialize genotypes with 3 activator genes, 3 repressor genes, and 1 effector gene. Cis-  
401 regulatory sequences and consensus binding sequences contain As, Cs, Gs, and Ts sampled with  
402 equal probability. Rate constants associated with the expression of each gene, are sampled from  
403 the distributions described above and summarized in **Table 1**.

404

### 405 **Mutation**

406 A genotype is subjected to 5 broad classes of mutation, at rates summarized in **Table 2** and  
 407 justified in **S1 Text** section 8. First are single nucleotide substitutions in the cis-regulatory  
 408 sequence; the resident nucleotide mutates into one of the other three types of nucleotides with  
 409 equal probability. Second are single nucleotide changes to the consensus binding sequence of a  
 410 TF, with the resident nucleotide mutated into one of the other three types at equal probability.  
 411 Both of these can affect the number and strength of TFBSs.

412

413

**Table 2. Mutation rates and effect sizes**

| Mutation                                          | Relative rate                                | Effect of mutation <sup>[1]</sup>            |
|---------------------------------------------------|----------------------------------------------|----------------------------------------------|
| Single nucleotide substitution                    | $5.25 \times 10^{-8}$ per gene               |                                              |
| Gene deletion                                     | $1.5 \times 10^{-7}$ per gene <sup>[2]</sup> |                                              |
| Gene duplication                                  | $1.5 \times 10^{-7}$ per gene <sup>[2]</sup> |                                              |
| Mutation to consensus sequence of a TF            | $3.5 \times 10^{-9}$ per gene                |                                              |
| Mutation to TF identity (activator vs. repressor) | $3.5 \times 10^{-9}$ per gene                |                                              |
| Mutation to $K_d(0)$                              | $3.5 \times 10^{-9}$ per gene                | $k = 0.5, \mu = -5^{[2]}, \sigma = 0.776$    |
| Mutation to $L$                                   | $1.2 \times 10^{-11}$ per codon              |                                              |
| Mutation to $r_{protein\_syn}$                    | $9.5 \times 10^{-12}$ per codon              | $k = 0.5, \mu = 0.021^{[2]}, \sigma = 0.760$ |
| Mutation to $r_{protein\_deg}$                    | $9.5 \times 10^{-12}$ per codon              | $k = 0.5, \mu = -1.88, \sigma = 0.739$       |
| Mutation to $r_{Act\_to\_Int}$                    | $9.5 \times 10^{-12}$ per codon              | $k = 0.5, \mu = 1.57^{[2]}, \sigma = 0.773$  |
| Mutation to $r_{mRNA\_deg}$                       | $9.5 \times 10^{-12}$ per codon              | $k = 0.5, \mu = -1.19, \sigma = 0.396$       |

414 Mutation to these quantitative rates takes the form  $\log_{10}x' = \log_{10}x + \text{Normal}(k(\mu -$   
 415  $\log_{10}x), \sigma)$ , where  $x$  is the original value of a rate and  $x'$  is the value after mutation. See **S1 Text**  
 416 section 8 for details.

417 <sup>2</sup>The value of this parameter is different during burn-in. See **S1 Text** section 8 for details.  
 418 Third are gene duplications or deletions. Because computational cost scales steeply (and non-  
 419 linearly) with network size, we do not allow effector genes to duplicate once there are 5 copies,  
 420 nor TF genes to duplicate once the total number of TF gene copies is 19. We also do not allow  
 421 the signal, the last effector gene, nor the last TF gene to be deleted.

422

423 Fourth are mutations to gene-specific expression parameters. Most of these ( $L, r_{Act\_to\_Int},$   
 424  $r_{protein\_syn}, r_{mRNA\_deg},$  and  $r_{protein\_deg}$ ) apply to both TFs and effector genes, while mutations to the  
 425 gene-specific values of  $K_d(0)$  apply only to TFs. Each mutation to  $L$  increases or decreases it by 1  
 426 codon, with equal probability unless  $L$  is at the upper or lower bound. Effect sizes of mutations  
 427 to the other five parameters are modeled in such a way that mutation would maintain log-

428 normal stationary distributions for these values, in the absence of selection or arbitrary bounds  
429 (see **S1 Text** section 8 for details). Upper and lower bounds (**S1 Text** section 8) are used to  
430 ensure that selection never drives these parameters to unrealistic values.

431

432 Fifth is conversion of a TF from being an activator to being a repressor, and vice versa. The signal  
433 is always an activator, and does not evolve.

434

435 Importantly, this scheme allows for divergence following gene duplication. When duplicates  
436 differ due only to mutations of class 4, i.e. protein function is unchanged, we refer to them as  
437 “copies” of the same gene, encoding “protein variants”. Mutations in classes 2 and 5 can create  
438 a new protein.

439

440

## 441 **Results**

### 442 **Functional AND-gated C1-FFLs evolve readily under selection for filtering out a short** 443 **spurious signal**

444 We begin by simulating the easiest case we can devise to allow the evolution of C1-FFLs for their  
445 purported function of filtering out short spurious signals. The signal is allowed to act directly on  
446 the AND-gate-capable effector, so all that needs to evolve is a single activating TF between the  
447 two, as well as AND-logic for the effector. We score motifs at the end of a set number of  
448 generations (see Methods). Evolved C1-FFLs are scored and classified into subtypes based on  
449 the presence of non-overlapping TFBSs (**Fig 3B**). The important subtype comparison for our  
450 purposes being the AND-gated C1-FFL vs. the next three non-AND-gated C1-FFL types combined  
451 (OR-gated, signal-controlled, and slow-TF-controlled); the remaining three logic subtypes are

452 vanishingly rare. The adaptive hypothesis predicts the evolution of the subtype with AND-  
453 regulatory logic, which requires both the effector to be stimulated both by the signal and by the  
454 slow TF. While all replicates show large increases in fitness, a multimodal distribution of final  
455 fitness states is observed, indicating whether or not the replicate was successful at evolving the  
456 phenotype of interest rather than becoming stuck at an alternative locally optimal phenotype  
457 (**Fig 5A**). AND-gated C1-FFLs frequently evolve in the high fitness outcomes, but not the low  
458 fitness outcomes (**Fig 5B**).

459

460 We also see C1-FFLs that, contrary to expectations, are not AND-gated; while found primarily in  
461 the low fitness replicates, some are also in the high fitness genotypes (**Fig 5B**). However, this is  
462 based on scoring motifs and their logic gates on the basis of all TFBSs, even those with two  
463 mismatches and hence low binding affinity. Unless these weak TFBSs are deleterious, they will  
464 appear quite often by chance alone. A random 8-bp sequence has probability  $\binom{8}{2} \times 0.25^6 \times$   
465  $0.75^2 = 0.0038$  of being a two-mismatch binding site for a given TF. In our model, a TF has the  
466 potential to recognize 137 different sites in a 150-bp cis-regulatory sequence (taking into  
467 account steric hindrance at the edges), each with 2 orientations. Thus, by chance alone a given  
468 TF will have  $0.0038 \times 137 \times 2 \approx 1$  two-mismatch binding sites in a given cis-regulatory  
469 sequence (ignoring palindromes for simplicity), compared to only  $\sim 0.1$  one-mismatch TFBSs.  
470 Excluding two-mismatch TFBSs when scoring motifs significantly reduces the non-AND-gated C1-  
471 FFLs, while only modestly reducing the observed frequency of adaptively evolved AND-gated C1-  
472 FFLs in the high fitness mode (**Fig 5C**).

473



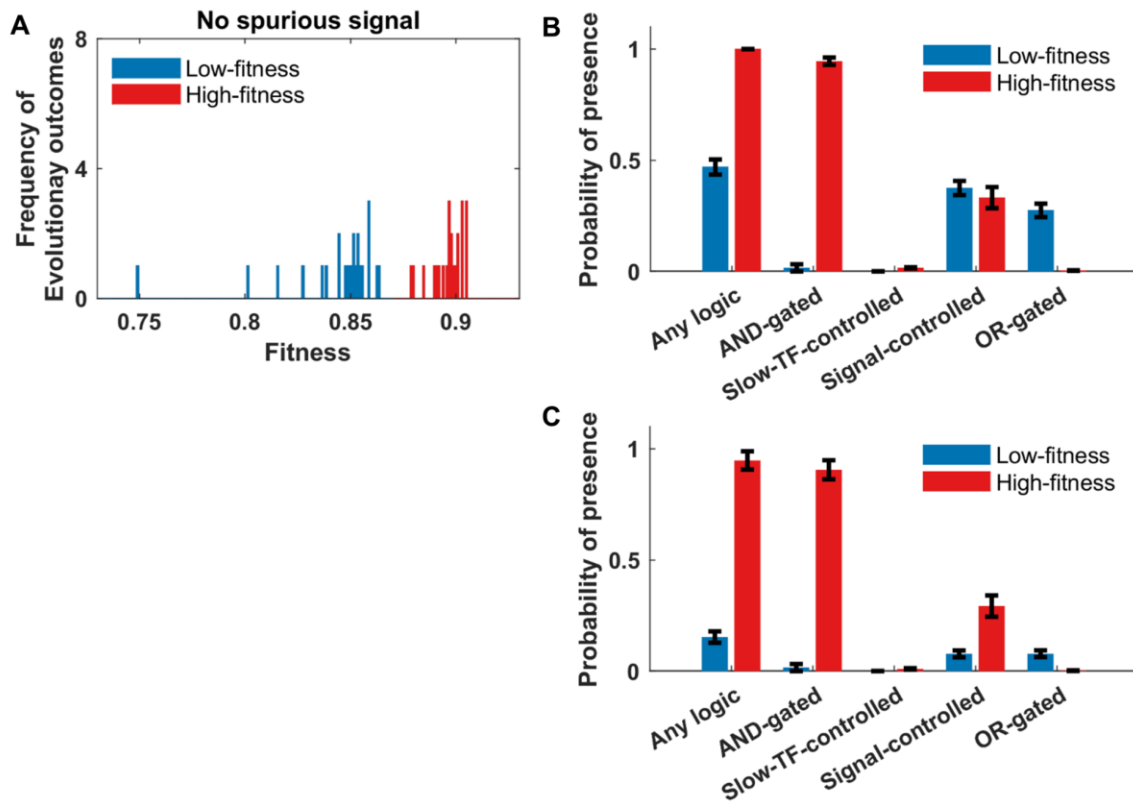

474

475 **Fig 5. AND-gated C1-FFLs are associated with a successful response to selection for filtering**

476 **out short spurious signals. (A)** Distribution of fitness outcomes across replicate simulations,

477 calculated as the average fitness over the last 10,000 steps of the evolutionary simulation. We

478 divide genotypes into a low-fitness group (blue) and a high-fitness group (red) using as a

479 threshold an observed gap in the distribution. **(B)** High fitness outcomes are characterized by

480 the presence of an AND-gated C1-FFL. “Any logic” counts all seven subtypes shown in **Fig 3B**.

481 Because one TRN can contain multiple C1-FFLs of different subtypes, “Any logic” will generally

482 be less than the sum of the occurrences of all seven subtypes. See **S1 Text** section 10 for details

483 on the calculation of the y-axis. **(C)** The over-representation of AND-gated C1-FFLs becomes

484 even more pronounced relative to alternative logic-gating when weak (two-mismatch) TFBSs are

485 excluded while scoring motifs. Data are shown as mean $\pm$ SE of the occurrence over replicate

486 evolution simulations.  $n = 23$  for high-fitness group, and  $n = 24$  for low-fitness group.

487

488 To confirm the functionality of these AND-gated C1-FFLs, we mutated the evolved genotype in  
489 two different ways (**Fig 6A**) to remove the AND regulatory logic. As expected, this lowers fitness  
490 in the presence of the short spurious signal but increases fitness in the presence of constant  
491 signal, with a net reduction in fitness (**Fig 6B**). This is consistent with AND-gated C1-FFLs  
492 representing a tradeoff, by which a more rapid response to a true signal is sacrificed in favor of  
493 the greater reliability of filtering out short spurious signals.

494

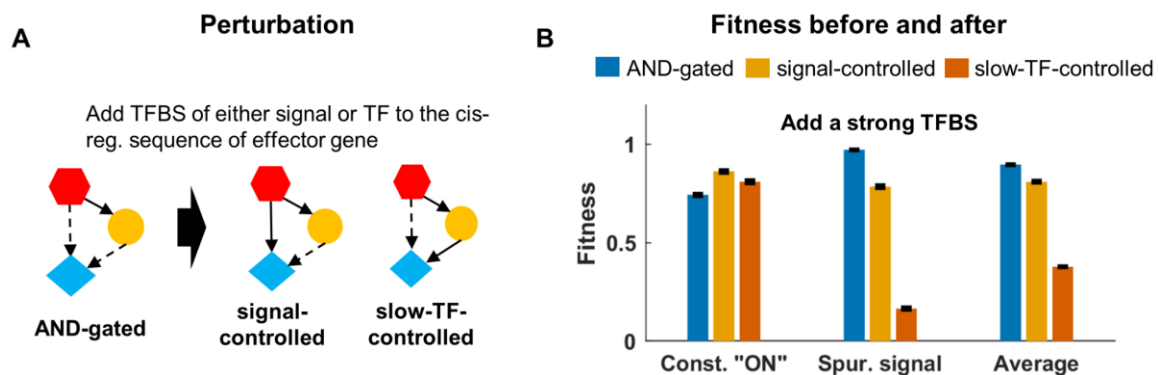

495

496 **Fig 6. Destroying the AND-logic of a C1-FFL removes its ability to filter out short spurious**  
497 **signals. (A)** For each of the  $n = 23$  replicates in the high fitness group in **Fig 5**, we perturbed the  
498 AND-logic in two ways, by adding one binding site of either the signal or the slow TF to the cis-  
499 regulatory sequence of the effector gene, done for the subset of evolutionary steps for that  
500 replicate with AND-gated C1-FFLs and lacking other potentially confounding motifs (see **S1 Text**  
501 section 11 for details). **(B)** Destroying the AND-logic slightly increases the ability to respond to  
502 the signal, but leads to a larger loss of fitness when short spurious signals are responded to.  
503 Data are shown as mean $\pm$ SE over replicate evolutionary simulations.

504

505 To test the extent to which C1-FFLs can evolve non-adaptively, we simulated evolution under  
506 three negative control conditions: 1) neutrality, i.e. all mutations are accepted to become the  
507 new resident genotype; 2) no spurious signal, i.e. the effector should be expressed under a  
508 constant “ON” signal and not under a constant “OFF” signal; 3) harmless spurious signal, i.e. the  
509 effector should be expressed under a constant “ON” environment whereas effector expression  
510 in the “OFF” environment with short spurious signals is neither punished nor rewarded beyond  
511 the cost of unnecessary gene expression. AND-gated C1-FFLs evolve much less often under all  
512 three negative control conditions (**Fig 7**). Non-AND-gated C1-FFLs do evolve under the negative  
513 control conditions (**Fig 7A**), but disappear when weak TFBSs are excluded during motif scoring  
514 (**Fig 7B**).

515

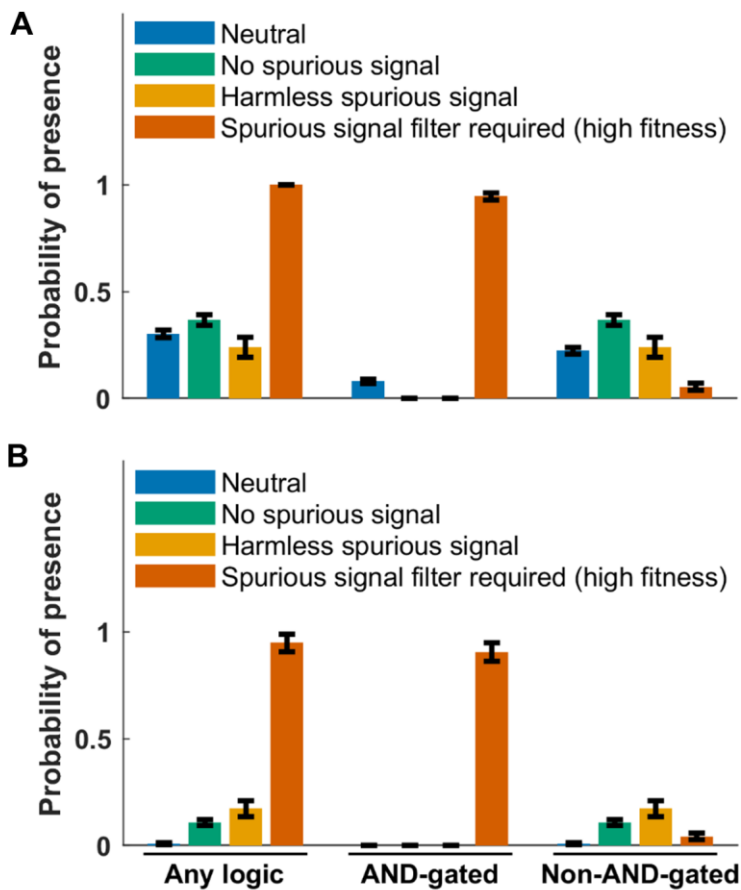

516

517 **Fig 7. Selection for filtering out short spurious signals is the primary cause of C1-FFLs.** TRNs are  
518 evolved under different selection conditions, and we score the probability that at least one C1-  
519 FFL is present (**S1 Text** section 10). Weak (two-mismatch) TFBSs are included (**A**) or excluded (**B**)  
520 during motif scoring. Data are shown as mean $\pm$ SE over evolutionary replicates. C1-FFL  
521 occurrence is similar for high-fitness and low-fitness outcomes in control selective conditions (**S3**  
522 **Fig**), and so all evolutionary outcomes were combined.  $n = 30$  for “Neutral”,  $n = 34$  for “No  
523 spurious signal”,  $n = 30$  for “Harmless spurious signal”. “Spurious signal filter required (high  
524 fitness subset)” uses the same data as in **Fig 5**.

525

### 526 **Diamond motifs are an alternative adaptation in more complex networks**

527 Sometimes the source signal will not be able to directly regulate an effector, and must instead  
528 operate via a longer regulatory pathway involving intermediate TFs [61]. In this case, even if the  
529 signal itself takes the idealized form shown in **Fig 4**, its shape after propagation may become  
530 distorted by the intrinsic processes of transcription. Motifs are under selection to handle this  
531 distortion.

532

533 To enforce indirect regulation, we ran simulations in which the signal was not allowed to bind to  
534 the cis-regulatory sequence of effector genes. The fitness distribution of the evolutionary  
535 replicates has only one mode (**S4 Fig**), so we compared the highest fitness, lowest fitness, and  
536 median fitness replicates. In agreement with results when direct regulation is allowed,  
537 genotypes of low and medium fitness contain few AND-gated C1-FFLs, while high fitness  
538 genotypes contain many (**Fig 8A, left**).

539

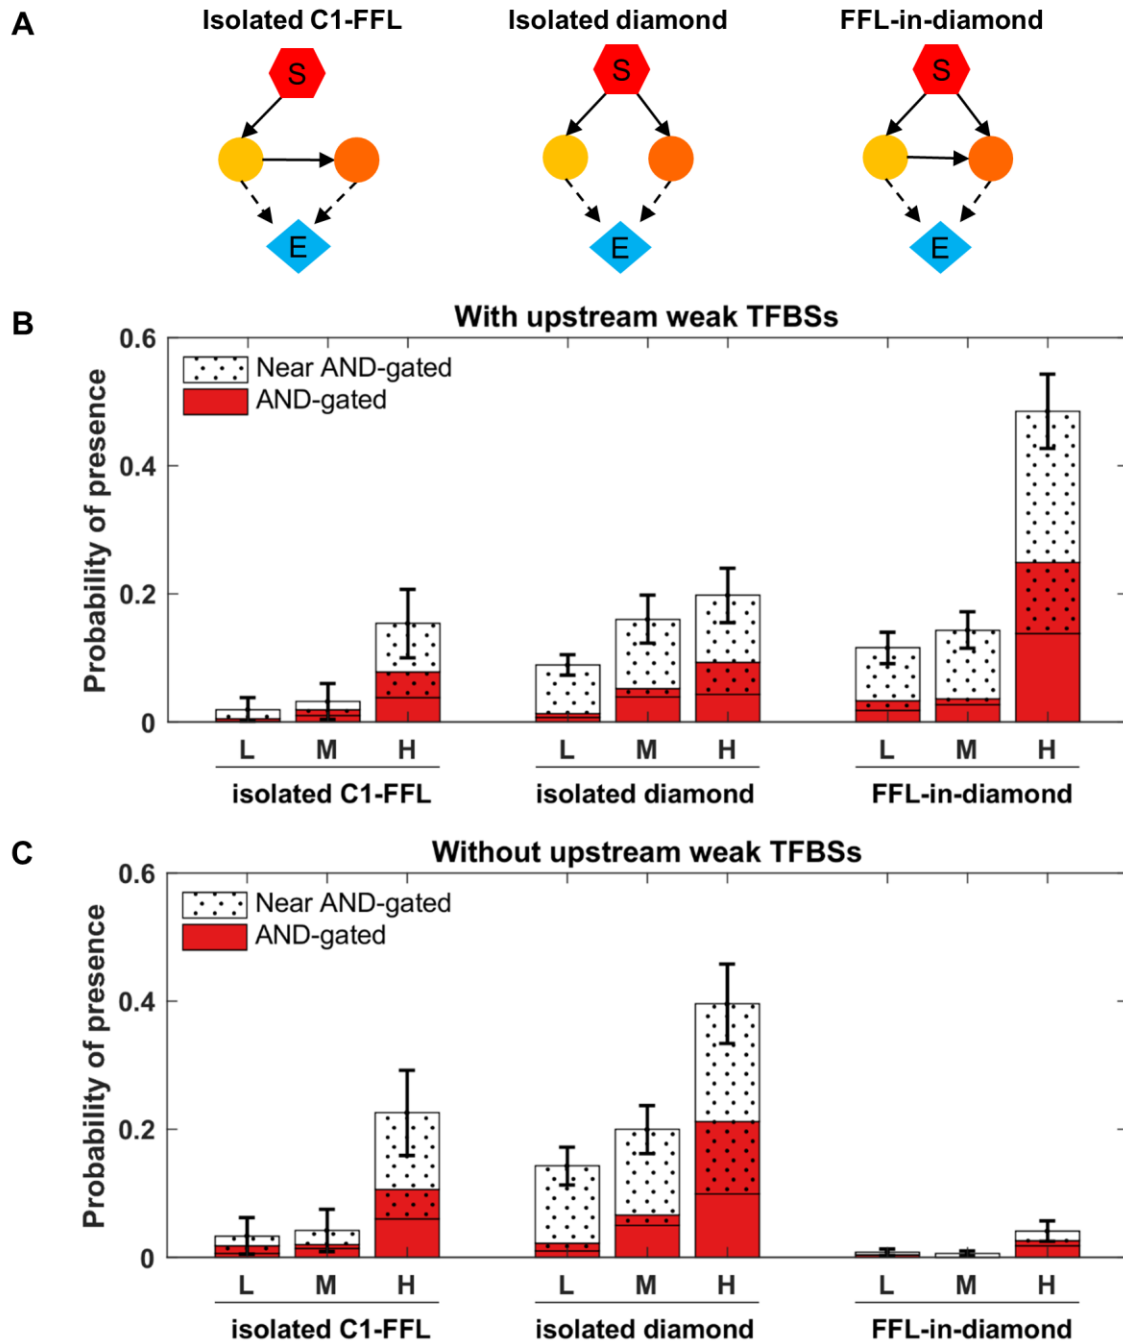

540

541 **Fig 8. Both AND-gated C1-FFLs and AND-gated diamonds (A) are associated with high fitness in**  
 542 **complex networks under selection to filter out short spurious signals.** Out of 115 simulations  
 543 **(S4 Fig), we took the 30 with the highest fitness (H), the 30 with the lowest fitness (L), and 30 of**  
 544 **around median fitness (M). AND-gated motifs are scored while including weak TFBSs, near-AND-**

545 gated motifs are those scored only when these are excluded. It is possible for the same  
546 genotype to contain one of each, resulting in overlap between the red AND-gated columns and  
547 the dotted near-AND-gated columns. Weak TFBSs upstream, i.e. not in the effector, are shown  
548 both included (**B**) and excluded (**C**). See **S1 Text** section 10 for y-axis calculation details. Error  
549 bars show mean $\pm$ SE over replicate evolutionary simulations.

550

551 While visually examining the network context of these C1-FFLs, we discovered that many were  
552 embedded within AND-gated “diamonds” to form “FFL-in-diamonds” (**Fig 8A right**). This led us  
553 to discover that AND-gated diamonds also occurred frequently without AND-gated C1-FFLs to  
554 form “isolated diamonds” (**Fig 8A middle**). Note that it is in theory possible, but in practice  
555 uncommon, for diamonds to be part of more complex conjugates. Systematically scoring the  
556 AND-gated isolated diamond motif confirmed its high occurrence (**Fig 8B, middle**).

557

558 An AND-gated C1-FFL integrates information from a short/fast regulatory pathway with  
559 information from a long/slow pathway, in order to filter out short spurious signals. A diamond  
560 achieves the same end of integrating fast and slow transmitted information via differences in  
561 the gene expression dynamics of the two regulatory pathways, rather than via topological length  
562 (**Fig 9**).

563

564 Note that a simple transcriptional cascade, signal  $\rightarrow$  TF  $\rightarrow$  effector, has also been found  
565 experimentally to filter out short spurious signals, e.g. when the intermediate TF is rapidly  
566 degraded, dampening the effect of a brief signal [62]. Two such transcriptional cascades  
567 involving different intermediate TFs form a diamond, so the utility of a single cascade is a  
568 potential explanation for the high prevalence of double-cascade diamonds. However, in this

569 case we would have no reason to expect marked differences in expression dynamics between  
570 the two TFs, as illustrated in Fig 9. We will also see below that AND-gates evolve between the  
571 two cascades.  
572

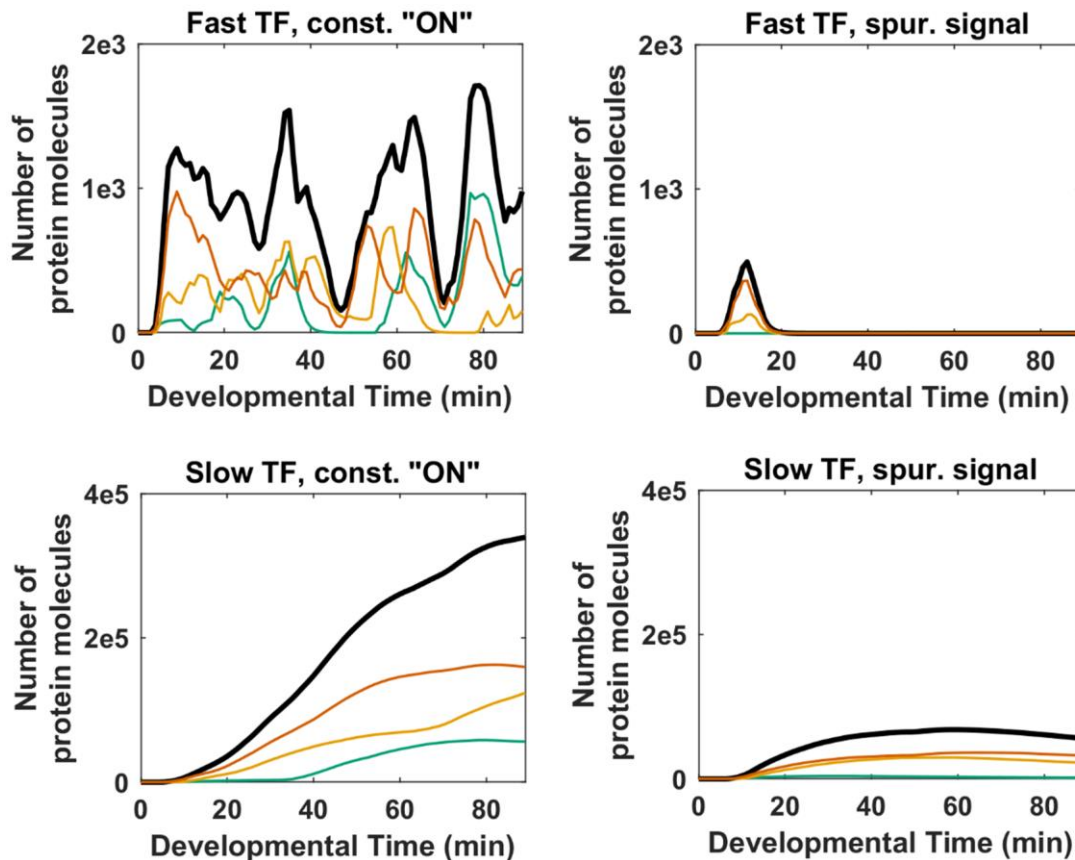

573  
574 **Fig 9. The two intermediate TFs in an AND-gated “diamond” motif have different expression**  
575 **dynamics and propagate the signal at different speeds.** The expression of the two TFs in one  
576 representative AND-gated isolated diamond from a high-fitness genotype in Fig 8B is shown.  
577 Each TFs is a different protein, and each is encoded by 3 gene copies, shown separately in  
578 colors, with the total in thick black. The expression of one TF plateaus faster than that of the  
579 other; this is characteristic of the AND-gated diamond motif, and leads to the same functionality  
580 as the AND-gated C1-FFL. The two TFs are indistinguishable topologically, but can be easily and

581 reliably assigned identities as “fast” and “slow” by using the fact that the fast TF degrades faster  
582 (has higher  $r_{protein\_deg}$ ). We use the geometric mean  $r_{protein\_deg}$  over gene copies of a TF in order to  
583 differentiate the two TFs for analysis in **Fig 9** and elsewhere.

584

### 585 **Weak TFBSs make motif scoring more difficult**

586 Results depend on whether we include weak TFBSs when scoring motifs. Weak TFBSs can either  
587 be in the effector’s cis-regulatory region, affecting how the regulatory logic is scored, or  
588 upstream, affecting only the presence or absence of motifs. When a motif is scored as AND-  
589 gated only when two-mismatch TFBSs in the effector are excluded, we call it a “near-AND-  
590 gated” motif. Recall from **Fig 3B** that effector expression requires two TFs to be bound, with  
591 only one TFBS of each type creating an AND-gate. When a second, two-mismatch TFBS of the  
592 same type is present, we have a near-AND-gate. TFs may bind so rarely to this weak affinity TFBS  
593 that its presence changes little, making the regulatory logic still effectively AND-gated. A near-  
594 AND-gated motif may therefore evolve for the same adaptive reasons as an AND-gated one. **Fig**  
595 **8B** and **C** shows that both AND-gated and near-AND-gated motifs are enriched in the high fitness  
596 genotypes.

597

598 When we exclude upstream weak TFBSs while scoring motifs, FFL-in-diamonds are no longer  
599 found, while the occurrence of isolated C1-FFLs and diamonds increases (**Fig 8C**). This makes  
600 sense, because adding one weak TFBS, which can easily happen by chance alone, can convert an  
601 isolated diamond or C1-FFL into a FFL-in-diamond (added between intermediate TFs, or from  
602 signal to slow TF, respectively).

603



604 AND-gated isolated C1-FFLs appear mainly in the highest fitness outcomes, while AND-gated  
605 isolated diamonds appear in all fitness groups (**Fig 8C**), suggesting that diamonds are easier to  
606 evolve. 18 out of 30 high-fitness evolutionary replicates are scored as having a putatively  
607 adaptive AND-gated or near-AND-gated motif in at least 50% of their evolutionary steps when  
608 upstream weak TFBSs are ignored (close to addition of bars in **Fig 8C**, because these two AND-  
609 gated motifs rarely coexist in a high-fitness genotype). The remaining 12 have more complex  
610 arrangements of weak TFBSs that mimic a single strong one.

611

612 Just as for the AND-gated C1-FFLs evolved under direct regulation and analyzed in **Fig 6**,  
613 perturbation analysis supports an adaptive function for AND-gated C1-FFLs and diamonds  
614 evolved under indirect regulation (**Fig 10A.i, 10B.i**). Breaking the AND-gate logic of these motifs  
615 by adding a (strong) TFBS to the effector cis-regulatory region reduces the fitness under the  
616 spurious signal but increases it under the constant “ON” beneficial signal, resulting in a net  
617 decrease in the overall fitness.

618

619 If we add a two-mismatch TFBS instead, this converts an AND-gated motif to a near-AND-gated  
620 motif. This lowers fitness only when the extra link is from the slow TF to the effector, and not  
621 when the extra link is from the fast TF to the effector (**Fig 10B.ii, 10C.ii**). Indeed, these extra  
622 links are tolerated during evolution too: if we take the 7 high-fitness replicates that contain a  
623 near-AND-gated C1-FFL in at least 5% of the evolutionary steps, in all 7 cases this motif is near-  
624 AND-gated rather than AND-gated because of an extra weak TFBS for the fast TF, while this is  
625 never due to a weak TFBS for the slow TF in C1-FFLs. Similarly, out of the 20 high-fitness  
626 replicates that contain a near-AND-gated diamond, 11 cases are primarily because of an extra  
627 weak TFBS of the fast TF, 9 cases (all of them OR-gated) are because of weak TFBSs for both TFs,

628 and no cases are primarily due to an extra TFBS for the slow TF. By chance alone, fast and slow  
 629 TF should be equally likely to contribute the weak TFBS that makes a motif near-AND-gated  
 630 rather than AND-gated. This non-random occurrence of weak TFBSs creating near-AND-gates  
 631 illustrates how even weak TFBSs can be shaped by selection against some (but not all) motif-  
 632 breaking links.

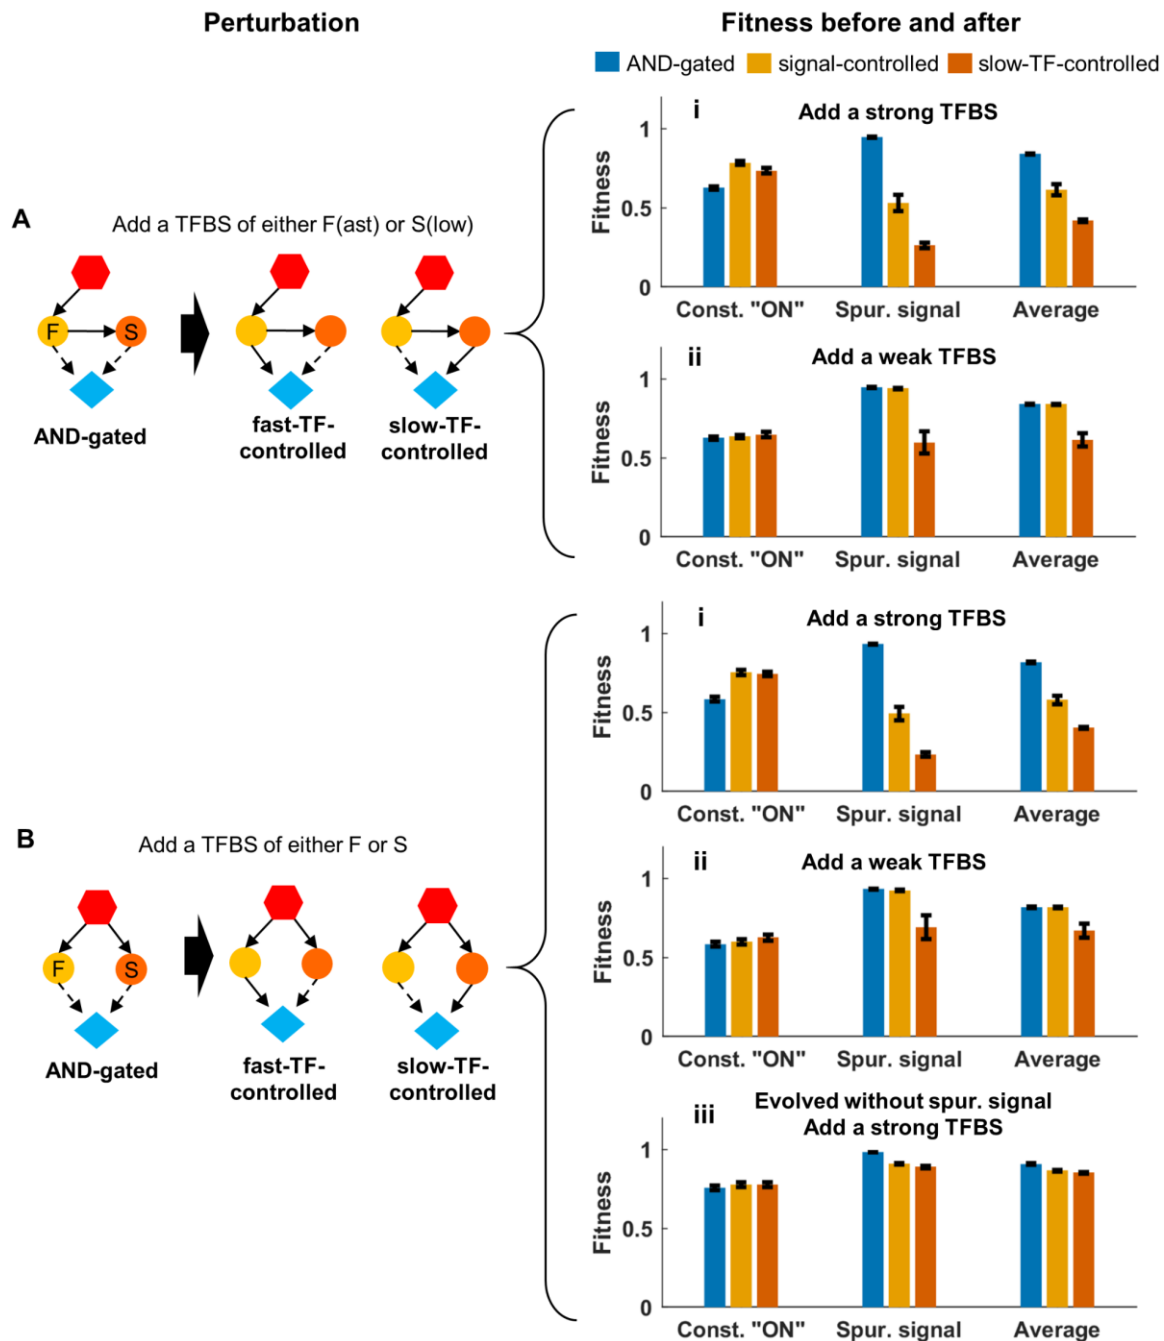

633 **Fig 10. Perturbation analysis shows that AND-gated C1-FFLs (A) and diamonds (B) filter out**  
634 **short spurious signals.** We add a strong TFBS (i) or a two-mismatch TFBS (ii) or (iii); the latter  
635 creates near-AND-gated motifs. Allowing the effector to respond to the slow TF alone slightly  
636 increases the ability to respond to the signal, but leads to a larger loss of fitness when effector  
637 expression is undesirable. Allowing the effector to respond to the fast TF alone does so only  
638 when the conversion uses a strong TFBS not a two-mismatch TFBS. (A) We perform the  
639 perturbation on 5 of the 11 high-fitness replicates from **Fig 8B** that evolved an AND-gated C1-  
640 FFL. (B) (i) and (ii) are based on 4 of the 26 high-fitness replicates from selection to filter out  
641 short spurious external signals (**Fig 8B**), (iii) is based on 18 of the 31 replicates from selection for  
642 signal recognition in the absence of an external spurious signal (**Fig 11B**). The 26 and 31  
643 replicates were the ones with AND-gated diamond. Replicate exclusion was based on the co-  
644 occurrence of other motifs with the potential to confound results (see **S1 Text** section 11 for  
645 details). Data are shown as mean $\pm$ SE of the averaged fitness over replicate evolutionary  
646 simulations.

647

648 **AND-gated isolated diamonds also evolve in the absence of external spurious signals**

649 We simulated evolution under the same three control conditions as before, this time without  
650 allowing the signal to directly regulate the effector. In the “no spurious signal” and “harmless  
651 spurious signal” control conditions, motif frequencies are similar between low and high fitness  
652 genotypes (**S5 Fig, S6 Fig**), and so our analysis includes all evolutionary replicates. When weak  
653 (two-mismatch) TFBSs are excluded, AND-gated isolated C1-FFLs are seen only after selection  
654 for filtering out a spurious signal, and not under other selection conditions (**Fig 11A**). However,  
655 AND-gated isolated diamonds also evolve in the absence of spurious signals, indeed at even  
656 higher frequency (**Fig 11B**). Results including weak TFBSs are similar (**S7 Fig**).

657 Perturbing the AND-gate logic in these isolated diamonds reduces fitness via effects in the  
658 environment where expressing the effector is deleterious (**Fig 10B.iii**). Even in the absence of  
659 external short spurious signals, the stochastic expression of intermediate TFs might effectively  
660 create short spurious signals when the external signal is set to “OFF”. It seems that AND-gated  
661 diamonds evolve to mitigate this risk, but that AND-gated C1-FFLs do not. The duration of  
662 internally generated spurious signals has an exponential distribution, which means that the  
663 optimal filter would be one that does not delay gene expression [63]. The two TFs in an AND-  
664 gated diamond can be activated simultaneously, but they must be activated sequentially in an  
665 AND-gated C1-FFL; the shorter delays possible with AND-gated diamonds might explain why  
666 only diamonds and not FFLs evolve to filter out intrinsic noise in gene expression.  
667

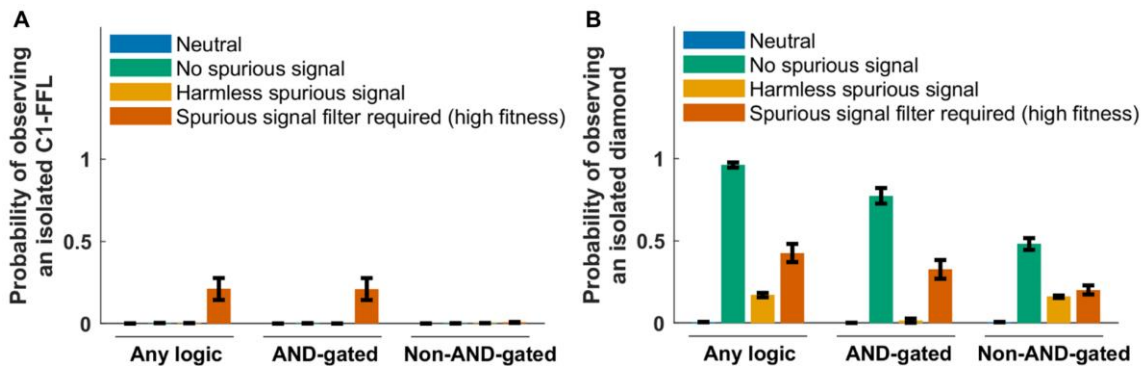

668  
669 **Fig 11. Selection for filtering out a short spurious signal is the primary way to evolve AND-**  
670 **gated isolated C1-FFLs (A), but AND-gated isolated diamonds also evolve in the absence of**  
671 **spurious signals (B).** The selection conditions are the same as in **Fig 7**, but we do not allow the  
672 signal to directly regulate the effector. When scoring motifs, we exclude all two-mismatch  
673 TFBSs; more comprehensive results are shown in **S7 Fig**. See **S1 Text** section 10 for the  
674 calculation of y-axis. Data are shown as mean±SE over evolutionary replicates.  $n = 30$  for

675 “Neutral”,  $n = 50$  for “No spurious signal”, and  $n = 60$  for “Harmless spurious signal”. We reused  
676 data from **Fig 8** for “Spurious signal filter required (high fitness)”,  $n = 30$ .

677

678

## 679 **Discussion**

680 There has never been sufficient evidence to satisfy evolutionary biologists that motifs in TRNs  
681 represent adaptations for particular functions. Critiques by evolutionary biologists to this effect  
682 [13-23] have been neglected, rather than answered, until now. While C1-FFLs can be conserved  
683 across different species [64-67], this does not imply that specific “just-so” stories about their  
684 function are correct. In this work, we study the evolution of AND-gated C1-FFLs, which are  
685 hypothesized to be adaptations for filtering out short spurious signal [3]. Using a novel and more  
686 mechanistic computational model to simulate TRN evolution, we found that AND-gated C1-FFLs  
687 evolve readily under selection for filtering out a short spurious signal, and not under control  
688 conditions. Our results support the adaptive hypothesis about C1-FFLs.

689

690 Previous studies have also attempted to evolve adaptive motifs in a computational TRN,  
691 successfully under selection for circadian rhythm and for multiple steady states [68], and  
692 unsuccessfully under selection to produce a sine wave in response to a periodic pulse [23]. Our  
693 successful simulation might offer some methodological lessons, especially a focus on high-  
694 fitness evolutionary replicates, which was done by us and by Burda et al. [68] but not by Knabe  
695 et al. [23]. Knabe et al. [23] suggested that including a cost for gene expression may suppress  
696 unnecessary links and promote motifs. However, we found AND-gated C1-FFLs still evolve in the  
697 high-fitness genotypes under selection for filtering out a spurious signal, even when there is no  
698 cost of gene expression (**S8 Fig**).

699

700 AND-gated C1-FFLs express an effector after a noise-filtering delay when the signal is turned on,  
701 but shut down expression immediately when the signal is turned off, giving rise to a “sign-  
702 sensitive delay” [3, 7]. Rapidly switching off has been hypothesized to be part of their selective  
703 advantage, above and beyond the function of filtering out short spurious signals [63]. We  
704 selected only for filtering out a short spurious signal, and not for fast turn-off, and found that  
705 this was sufficient for the adaptive evolution of AND-gated C1-FFLs.

706

707 Most previous research on C1-FFLs has used an idealized implementation (e.g. a square wave) of  
708 what a short spurious signal entails [4, 63, 69]. In real networks, noise arises intrinsically in a  
709 greater diversity of forms, which our model does more to capture. Even when a “clean” form of  
710 noise enters a TRN, it subsequently gets distorted with the addition of intrinsic noise [70].  
711 Intrinsic noise is ubiquitous and dealing with it is an omnipresent challenge for selection.  
712 Indeed, we see adaptive diamonds evolve to suppress intrinsic noise, even when we select in  
713 the complete absence of extrinsic spurious signals.

714

715 Our model, while complex for a model and hence capable of capturing intrinsic noise, is  
716 inevitably less complex than the biological reality. However, we hope to have captured key  
717 phenomena, albeit in simplified form. E.g., a key phenomenon is that TFBSs are not simply  
718 present vs. absent but can be strong or weak, i.e. the TRN is not just a directed graph, but its  
719 connections vary in strength. Our model, like that of Burda et al. [68] in the context of circadian  
720 rhythms, captures this fact by basing TF binding affinity on the number of mismatch deviations  
721 from a consensus TFBS sequence. While in reality, the strength of TF binding is determined by  
722 additional factors, such as broader nucleic context and cooperative behavior between TFs

723 (reviewed in Inukai et al. [71]), these complications are unlikely to change the basic dynamics of  
724 frequent appearance of weak TFBSs and enhanced mutational accessibility of strong TFBSs from  
725 weak ones. Similarly, AND-gating can be quantitative rather than qualitative [72], a  
726 phenomenon that weak TFBSs in our model provide a simplified version of. Note that our  
727 model, while powerful in some ways, is computationally limited to small TRNs.  
728 Core links in adaptive motifs involve strong not weak TFBSs. However, weak (two-mismatch)  
729 TFBSs can create additional links that prevent an adaptive motif from being scored as such.  
730 Some potential additional links are neutral while others are deleterious; the observed links are  
731 thus shaped by this selective filter, without being adaptive. Note that there have been  
732 experimental reports that even weak TFBSs can be functionally important [73, 74]; these might,  
733 however, better correspond to 1-mismatch TFBSs in our model than two-mismatch TFBSs.  
734 Ramos et al. [74] and Crocker et al. [73] identified their “weak” TFBSs in comparison to the  
735 strongest possible TFBS, not in comparison to the weakest still showing affinity above baseline.  
736  
737 A striking and unexpected finding of our study was that AND-gated diamonds evolved as an  
738 alternative motif for filtering out short spurious external signals, and that these, unlike FFLs,  
739 were also effective at filtering out intrinsic noise. Diamonds are not overrepresented in the TRNs  
740 of bacteria [2] or yeast [75], but are overrepresented in signaling networks (in which post-  
741 translational modification plays a larger role) [76], and in neuron networks [1]. In our model, we  
742 treated the external signal as though it were a transcription factor, simply as a matter of  
743 modeling convenience. In reality, signals external to a TRN are by definition not TFs (although  
744 they might be modifiers of TFs). This means that our indirect regulation case, in which the signal  
745 is not allowed to directly turn on the effector, is the most appropriate one to analyze if our  
746 interest is in TRN motifs that mediate contact between the two. Note that if we were to score

747 the signal as not itself a TF, we would observe adaptive C1-FFLs but not diamonds in this case, in  
748 agreement with the TRN data. However, this TRN data might miss functional diamond motifs  
749 that spanned levels of regulatory organization, i.e. that included both transcriptional and other  
750 forms of regulation. The greatest chance of finding diamonds within TRNs alone come from  
751 complex and multi-layered developmental cascades, rather than bacterial or yeast [77]. Multiple  
752 interwoven diamonds are hypothesized to be embedded with multi-layer perceptrons that are  
753 adaptations for complex computation in signaling networks [30].

754

755 The function of a motif relies ultimately on its dynamic behavior, with topology merely a means  
756 to that end. The C1-FFL motif is based on two pathways between signal and effector, one much  
757 faster than the other, which is achieved by making them different lengths. This same function  
758 was achieved non-topologically in our adaptively evolved diamond motifs. Multiple motifs have  
759 previously been found capable of generating the same steady state expression pattern [21];  
760 here we find multiple motifs for a much more complex function.

761

762 It is difficult to distinguish adaptations from “spandrels” [8]. Standard procedure is to look for  
763 motifs that are more frequent than expected from some randomized version of a TRN [2, 78].  
764 For this method to work, this randomization must control for all confounding factors that are  
765 non-adaptive with respect to the function in question, from patterns of mutation to a general  
766 tendency to hierarchy – a near-impossible task. Our approach to a null model is not to  
767 randomize, but to evolve with and without selection for the specific function of interest. This  
768 meets the standard of evolutionary biology for inferring the adaptive nature of a motif [13-23].

769

770



771 **Acknowledgements**

772 Work was supported by the University of Arizona and by a Pew Scholarship to JM, John  
773 Templeton Foundation grant 39667 to JM and KX, and by National Institutes of Health grants  
774 R35GM118170 to MLS and R01GM076041 to JM and AKL. We thank Hinrich Boeger for helpful  
775 discussions and careful reading of the manuscript, Jasmin Uribe for early work on this project,  
776 and the high-performance computing center at the University of Arizona for generous  
777 allocations.

## 778   **References**

779

- 780   1.     Milo R, Shen-Orr S, Itzkovitz S, Kashtan N, Chklovskii D, Alon U. Network motifs: Simple  
781         building blocks of complex networks. *Science*. 2002;298:824-827.
- 782   2.     Shen-Orr SS, Milo R, Mangan S, Alon U. Network motifs in the transcriptional regulation  
783         network of *Escherichia coli*. *Nat Genet*. 2002;31:64-68. doi: 10.1038/ng881.
- 784   3.     Alon U. Network motifs: theory and experimental approaches. *Nature Reviews Genetics*.  
785         2007;8:450-461.
- 786   4.     Mangan S, Alon U. Structure and function of the feed-forward loop network motif. *Proc*  
787         *Natl Acad Sci USA*. 2003;100:11980-11985. doi: 10.1073/pnas.2133841100.
- 788   5.     Jaeger KE, Pullen N, Lamzin S, Morris RJ, Wigge PA. Interlocking feedback loops govern  
789         the dynamic behavior of the floral transition in Arabidopsis. *The Plant Cell*. 2013;25:820-  
790         833. doi: 10.1105/tpc.113.109355.
- 791   6.     Peter IS, Davidson EH. Assessing regulatory information in developmental gene  
792         regulatory networks. *Proc Natl Acad Sci USA*. 2017;114:5862-5869. doi:  
793         10.1073/pnas.1610616114.
- 794   7.     Mangan S, Zaslaver A, Alon U. The coherent feedforward loop serves as a sign-sensitive  
795         delay element in transcription networks. *J Mol Biol*. 2003;334:197-204. doi:  
796         10.1016/j.jmb.2003.09.049.
- 797   8.     Gould SJ, Lewontin RC. The Spandrels of San Marco and the Panglossian Paradigm: A  
798         Critique of the Adaptationist Programme. *Proc R Soc Lond, Ser B: Biol Sci*. 1979;205:581-  
799         598.
- 800   9.     Graur D, Zheng Y, Price N, Azevedo RBR, Zufall RA, Elhaik E. On the Immortality of  
801         Television Sets: “Function” in the Human Genome According to the Evolution-Free

- 802 Gospel of ENCODE. *Genome Biology and Evolution*. 2013;5:578-590. doi:  
803 10.1093/gbe/evt028.
- 804 10. Masel J, Promislow DEL. Answering evolutionary questions: A guide for mechanistic  
805 biologists. *Bioessays*. 2016;38:704-711. doi: 10.1002/bies.201600029.
- 806 11. Widder S, Solé R, Macía J. Evolvability of feed-forward loop architecture biases its  
807 abundance in transcription networks. *BMC Systems Biology*. 2012;6:7. doi:  
808 10.1186/1752-0509-6-7.
- 809 12. Cordero OX, Hogeweg P. Feed-forward loop circuits as a side effect of genome  
810 evolution. *Mol Biol Evol*. 2006;23:1931-1936.
- 811 13. Artzy-Randrup Y, Fleishman SJ, Ben-Tal N, Stone L. Comment on "Network Motifs:  
812 Simple Building Blocks of Complex Networks" and "Superfamilies of Evolved and  
813 Designed Networks". *Science*. 2004;305:1107. doi: 10.1126/science.1099334.
- 814 14. Jenkins D, Stekel D. De Novo Evolution of Complex, Global and Hierarchical Gene  
815 Regulatory Mechanisms. *J Mol Evol*. 2010;71:128-140.
- 816 15. Lynch M. The evolution of genetic networks by non-adaptive processes. *Nature Reviews*  
817 *Genetics*. 2007;8:803-813. doi: 10.1038/nrg2192.
- 818 16. Mazurie A, Bottani S, Vergassola M. An evolutionary and functional assessment of  
819 regulatory network motifs. *Genome Biol*. 2005;6:R35.
- 820 17. Solé RV, Valverde S. Are network motifs the spandrels of cellular complexity? *Trends*  
821 *Ecol Evol*. 2006;21:419-422.
- 822 18. Tsuda ME, Kawata M. Evolution of Gene Regulatory Networks by Fluctuating Selection  
823 and Intrinsic Constraints. *PLoS Comp Biol*. 2010;6:e1000873.
- 824 19. Wagner A. Does Selection Mold Molecular Networks? *Sci STKE*. 2003;2003:pe41. doi:  
825 10.1126/stke.2003.202.pe41.

- 826 20. Kuo PD, Banzhaf W, Leier A. Network topology and the evolution of dynamics in an  
827 artificial genetic regulatory network model created by whole genome duplication and  
828 divergence. *BioSyst.* 2006;85:177-200. doi: 10.1016/j.biosystems.2006.01.004.
- 829 21. Payne JL, Wagner A. Function does not follow form in gene regulatory circuits. *Scientific*  
830 *Reports.* 2015;5:13015. doi: 10.1038/srep13015.
- 831 22. Ruths T, Nakhleh L. Neutral forces acting on intragenomic variability shape the  
832 *Escherichia coli* regulatory network topology. *Proc Natl Acad Sci USA.* 2013;110:7754-  
833 7759. doi: 10.1073/pnas.1217630110.
- 834 23. Knabe JF, Nehaniv CL, Schilstra MJ. Do motifs reflect evolved function?—No convergent  
835 evolution of genetic regulatory network subgraph topologies. *BioSyst.* 2008;94:68-74.  
836 doi: 10.1016/j.biosystems.2008.05.012.
- 837 24. Kærn M, Elston TC, Blake WJ, Collins JJ. Stochasticity in gene expression: from theories  
838 to phenotypes. *Nature Reviews Genetics.* 2005;6:451-464. doi: 10.1038/nrg1615.
- 839 25. Raser JM, O'Shea EK. Noise in Gene Expression: Origins, Consequences, and Control.  
840 *Science.* 2005;309:2010-2013.
- 841 26. Eldar A, Elowitz MB. Functional roles for noise in genetic circuits. *Nature.* 2010;467:167–  
842 173. doi: 10.1038/nature09326.
- 843 27. Draghi J, Whitlock M. Robustness to noise in gene expression evolves despite epistatic  
844 constraints in a model of gene networks. *Evolution.* 2015;69:2345-2358. doi:  
845 10.1111/evo.12732.
- 846 28. Jenkins DJ, Stekel DJ. A New Model for Investigating the Evolution of Transcription  
847 Control Networks. *Artif Life.* 2009;15:259-291. doi: doi:10.1162/artl.2009.Stekel.006.

- 848 29. Henry A, Hemery M, François P.  $\phi$ -evo: A program to evolve phenotypic models of  
849 biological networks. PLoS Comp Biol. 2018;14:e1006244. doi:  
850 10.1371/journal.pcbi.1006244.
- 851 30. Alon U. An Introduction to Systems Biology: Design Principles of Biological Circuits.  
852 London: Chapman and Hall/CRC; 2007.
- 853 31. Yuan GC, Liu YJ, Dion MF, Slack MD, Wu LF, Altschuler SJ, et al. Genome-scale  
854 identification of nucleosome positions in *S. cerevisiae*. Science. 2005;309:626-630.
- 855 32. Wunderlich Z, Mirny LA. Different gene regulation strategies revealed by analysis of  
856 binding motifs. Trends Genet. 2009;25:434-440. doi: 10.1016/j.tig.2009.08.003.
- 857 33. Maerkl SJ, Quake SR. A Systems Approach to Measuring the Binding Energy Landscapes  
858 of Transcription Factors. Science. 2007;315:233-237. doi: 10.1126/science.1131007.
- 859 34. Zhu J, Zhang MQ. SCPD: a promoter database of the yeast *Saccharomyces cerevisiae*.  
860 Bioinformatics. 1999;15:607-611. doi: 10.1093/bioinformatics/15.7.607.
- 861 35. Sharon E, Kalma Y, Sharp A, Raveh-sadka T, Levo M, Zeevi D, et al. Articles Inferring gene  
862 regulatory logic from high-throughput measurements of thousands of systematically  
863 designed promoters. Nat Biotechnol. 2012;30:521-530. doi: 10.1038/nbt.2205.
- 864 36. Benos PV, Bulyk ML, Stormo GD. Additivity in protein-DNA interactions: how good an  
865 approximation is it? Nucleic Acids Res. 2002;30:4442-4451.
- 866 37. Park S, Chung S, Kim KM, Jung KC, Park C, Hahm ER, et al. Determination of binding  
867 constant of transcription factor myc-max/max-max and E-box DNA: The effect of  
868 inhibitors on the binding. Biochim Biophys Acta Gen Subj. 2004;1670:217-228. doi:  
869 10.1016/j.bbagen.2003.12.007.

- 870 38. Nalefski EA, Nebelitsky E, Lloyd JA, Gullans SR. Single-molecule detection of transcription  
871 factor binding to DNA in real time: Specificity, equilibrium, and kinetic parameters.  
872 *Biochemistry*. 2006;45:13794-13806. doi: 10.1021/bi0602011.
- 873 39. Lee W, Tillo D, Bray N, Morse RH, Davis RW, Hughes TR, et al. A high-resolution atlas of  
874 nucleosome occupancy in yeast. *Nat Genet*. 2007;39:1235-44.
- 875 40. Brown CR, Mao C, Falkovskaia E, Jurica MS, Boeger H. Linking Stochastic Fluctuations in  
876 Chromatin Structure and Gene Expression. *PLoS Biol*. 2013;11:e1001621. doi:  
877 10.1371/journal.pbio.1001621.
- 878 41. Mao C, Brown CR, Falkovskaia E, Dong S, Hrabeta-Robinson E, Wenger L, et al.  
879 Quantitative analysis of the transcription control mechanism. *Mol Syst Biol*. 2010;6:431.  
880 doi: 10.1038/msb.2010.83.
- 881 42. Shahbazian MD, Grunstein M. Functions of Site-Specific Histone Acetylation and  
882 Deacetylation. *Annu Rev Biochem*. 2007;76:75-100. doi:  
883 10.1146/annurev.biochem.76.052705.162114.
- 884 43. Voss TC, Hager GL. Dynamic regulation of transcriptional states by chromatin and  
885 transcription factors. *Nature Reviews Genetics*. 2013;15:69-81. doi: 10.1038/nrg3623.
- 886 44. Katan-Khaykovich Y, Struhl K. Dynamics of global histone acetylation and deacetylation  
887 in vivo: rapid restoration of normal histone acetylation status upon removal of  
888 activators and repressors. *Genes Dev*. 2002;16:743-52. doi: 10.1101/gad.967302.
- 889 45. Courey AJ, Jia S. Transcriptional repression: the long and the short of it. *Genes Dev*.  
890 2001;15:2786-2796. doi: 10.1101/gad.939601.and.
- 891 46. Poss ZC, Ebmeier CC, Taatjes DJ. The Mediator complex and transcription regulation. *Crit*  
892 *Rev Biochem Mol Biol*. 2013;48:575-608. doi: 10.3109/10409238.2013.840259.

- 893 47. Decker KB, Hinton DM. Transcription Regulation at the Core: Similarities Among  
894 Bacterial, Archaeal, and Eukaryotic RNA Polymerases. *Annu Rev Microbiol.* 2013;67:113-  
895 139. doi: 10.1146/annurev-micro-092412-155756.
- 896 48. Roy AL, Singer DS. Core promoters in transcription: old problem, new insights. *Trends*  
897 *Biochem Sci.* 2015;40:165-171. doi: 10.1016/j.tibs.2015.01.007.
- 898 49. Pelechano V, Chávez S, Pérez-Ortín JE. A Complete Set of Nascent Transcription Rates  
899 for Yeast Genes. *PLoS ONE.* 2010;5:e115560.
- 900 50. Guillemette B, Bataille AR, Gevry N, Adam M, Blanchette M, Robert F, et al. Variant  
901 histone H2A.Z is globally localized to the promoters of inactive yeast genes and  
902 regulates nucleosome positioning. *PLoS Biol.* 2005;3:e384.
- 903 51. Dujon B. The yeast genome project: what did we learn? *Trends Genet.* 1996;12:263-270.  
904 doi: 10.1016/0168-9525(96)10027-5.
- 905 52. Niño CA, Hérisant L, Babour A, Dargemont C. mRNA nuclear export in yeast. *Chemical*  
906 *Reviews.* 2013;113:8523-8545. doi: 10.1021/cr400002g.
- 907 53. Smith C, Lari A, Derrer CP, Ouwehand A, Rossouw A, Huisman M, et al. In vivo single-  
908 particle imaging of nuclear mRNA export in budding yeast demonstrates an essential  
909 role for Mex67p. *J Cell Biol.* 2015;211:1121-1130. doi: 10.1083/jcb.201503135.
- 910 54. Mor A, Suliman S, Ben-Yishay R, Yunger S, Brody Y, Shav-Tal Y. Dynamics of single mRNP  
911 nucleocytoplasmic transport and export through the nuclear pore in living cells. *Nat Cell*  
912 *Biol.* 2010;12:543-552. doi: 10.1038/ncb2056.
- 913 55. Siwiak M, Zielenkiewicz P, Jacobson A, Grebogi C, Kito K. A Comprehensive,  
914 Quantitative, and Genome-Wide Model of Translation. *PLoS Comp Biol.*  
915 2010;6:e1000865. doi: 10.1371/journal.pcbi.1000865.

- 916 56. van Drogen F, Stucke VM, Jorritsma G, Peter M. MAP kinase dynamics in response to  
917 pheromones in budding yeast. *Nat Cell Biol.* 2001;3:1051.
- 918 57. Gillespie DT. Exact stochastic simulation of coupled chemical reactions. *Journal of*  
919 *Physical Chemistry.* 1977;81:2340-2361.
- 920 58. Ghaemmaghami S, Huh W-K, Bower K, Howson RW, Belle A, Dephoure N, et al. Global  
921 analysis of protein expression in yeast. *Nature.* 2003;425:737-741. doi:  
922 10.1038/nature02046.
- 923 59. Kafri M, Metzl-Raz E, Jona G, Barkai N. The Cost of Protein Production. *Cell Reports.*  
924 2016;14:22-31. doi: 10.1016/j.celrep.2015.12.015.
- 925 60. Kimura M. On the probability of fixation of mutant genes in a population. *Genetics.*  
926 1962;47:713-719.
- 927 61. Balázsi G, Barabási AL, Oltvai ZN. Topological units of environmental signal processing in  
928 the transcriptional regulatory network of *Escherichia coli*. *Proc Natl Acad Sci USA.*  
929 2005;102:7841-7846.
- 930 62. Hooshangi S, Thiberge S, Weiss R. Ultrasensitivity and noise propagation in a synthetic  
931 transcriptional cascade. *Proc Natl Acad Sci USA.* 2005;102:3581-3586. doi:  
932 10.1073/pnas.0408507102.
- 933 63. Dekel E, Mangan S, Alon U. Environmental selection of the feed-forward loop circuit in  
934 gene-regulation networks. *Phys Biol.* 2005;2:81.
- 935 64. Boyle AP, Araya CL, Brdlik C, Cayting P, Cheng C, Cheng Y, et al. Comparative analysis of  
936 regulatory information and circuits across distant species. *Nature.* 2014;512:453-456.  
937 doi: 10.1038/nature13668.



- 938 65. Kemmeren P, Sameith K, van de Pasch LAL, Benschop JJ, Lenstra TL, Margaritis T, et al.  
939 Large-Scale Genetic Perturbations Reveal Regulatory Networks and an Abundance of  
940 Gene-Specific Repressors. *Cell*. 2014;157:740-752. doi: 10.1016/j.cell.2014.02.054.
- 941 66. Stergachis AB, Neph S, Sandstrom R, Haugen E, Reynolds AP, Zhang M, et al.  
942 Conservation of trans-acting circuitry during mammalian regulatory evolution. *Nature*.  
943 2014;515:365-370. doi: 10.1038/nature13972.
- 944 67. Madan Babu M, Teichmann SA, Aravind L. Evolutionary Dynamics of Prokaryotic  
945 Transcriptional Regulatory Networks. *J Mol Biol*. 2006;358:614-633. doi:  
946 10.1016/j.jmb.2006.02.019.
- 947 68. Burda Z, Krzywicki A, Martin OC, Zagorski M. Motifs emerge from function in model  
948 gene regulatory networks. *Proc Natl Acad Sci USA*. 2011;108:17263-17268. doi:  
949 10.1073/pnas.1109435108.
- 950 69. Hayot F, Jayaprakash C. A feedforward loop motif in transcriptional regulation: induction  
951 and repression. *J Theor Biol*. 2005;234:133-143.
- 952 70. Pedraza JM, van Oudenaarden A. Noise Propagation in Gene Networks. *Science*.  
953 2005;307:1965-1969. doi: 10.1126/science.1109090.
- 954 71. Inukai S, Kock KH, Bulyk ML. Transcription factor–DNA binding: beyond binding site  
955 motifs. *Curr Opin Genet Dev*. 2017;43:110-119. doi: 10.1016/j.gde.2017.02.007.
- 956 72. Wang D, Yan K-K, Sisu C, Cheng C, Rozowsky J, Meyerson W, et al. Loregic: A Method to  
957 Characterize the Cooperative Logic of Regulatory Factors. *PLoS Comp Biol*.  
958 2015;11:e1004132. doi: 10.1371/journal.pcbi.1004132.
- 959 73. Crocker J, Abe N, Rinaldi L, McGregor Alistair P, Frankel N, Wang S, et al. Low Affinity  
960 Binding Site Clusters Confer Hox Specificity and Regulatory Robustness. *Cell*.  
961 2015;160:191-203. doi: 10.1016/J.CELL.2014.11.041.

- 962 74. Ramos AI, Barolo S. Low-affinity transcription factor binding sites shape morphogen  
963 responses and enhancer evolution. *Philosophical transactions of the Royal Society of*  
964 *London Series B, Biological sciences*. 2013;368:20130018. doi: 10.1098/rstb.2013.0018.
- 965 75. Lee TI, Rinaldi NJ, Robert F, Odom DT, Bar-Joseph Z, Gerber GK, et al. Transcriptional  
966 regulatory networks in *Saccharomyces cerevisiae*. *Science*. 2002;298:799-804.
- 967 76. Ma'ayan A, Jenkins SL, Neves S, Hasseldine A, Grace E, Dubin-Thaler B, et al. Formation  
968 of regulatory patterns during signal propagation in a mammalian cellular network.  
969 *Science*. 2005;309:1078-1083. doi: 10.1126/science.1108876.
- 970 77. Rosenfeld N, Alon U. Response Delays and the Structure of Transcription Networks. *J*  
971 *Mol Biol*. 2003;329:645-654. doi: 10.1016/S0022-2836(03)00506-0.
- 972 78. Kashtan N, Itzkovitz S, Milo R, Alon U. Efficient sampling algorithm for estimating  
973 subgraph concentrations and detecting network motifs. *Bioinformatics*. 2004;20:1746-  
974 1758. doi: 10.1093/bioinformatics/bth163.
- 975 79. SGD Project. [cited 2018 April 2]. Available from: <https://yeastmine.yeastgenome.org>.
- 976 80. Hocine S, Raymond P, Zenklusen D, Chao JA, Singer RH. Single-molecule analysis of gene  
977 expression using two-color RNA labeling in live yeast. *Nat Methods*. 2013;10:119-121.  
978 doi: 10.1038/nmeth.2305.
- 979 81. Larson DR, Zenklusen D, Wu B, Chao JA, Singer RH. Real-time observation of  
980 transcription initiation and elongation on an endogenous yeast gene. *Science*.  
981 2011;332:475-478. doi: 10.1126/science.1202142.
- 982 82. Wang Y, Liu CL, Storey JD, Tibshirani RJ, Herschlag D, Brown PO. Precision and functional  
983 specificity in mRNA decay. *Proc Natl Acad Sci USA*. 2002;99:5860-5865. doi:  
984 10.1073/pnas.092538799.

985 83. Belle A, Tanay A, Bitincka L, Shamir R, O'Shea EK. Quantification of protein half-lives in  
986 the budding yeast proteome. Proc Natl Acad Sci USA. 2006;103:13004-13009. doi:  
987 10.1073/pnas.0605420103.  
988

## 989 **Supporting information**

### 990 **S1 Fig. Examples of evolved phenotypes under selection for filtering out a short spurious**

991 **signal.** The figure shows the average expression of the effector protein over 200 replicate  
992 developmental simulations in each of the two environments. A high-fitness phenotype and a  
993 low-fitness phenotype, as defined in **Fig 5**, are shown for comparison. The signal is allowed to  
994 directly regulate the effector in these simulations.

995

### 996 **S2 Fig. Representative fitness trajectories under selection to filter out short spurious signals.**

997 **(A)** The signal is allowed to directly regulate the effector genes. **(B)** The signal cannot directly  
998 regulate the effector genes. Note the average is weighted, with environment 2 being considered  
999 twice as common as environment 1.

1000

### 1001 **S3 Fig. Genotypes evolved under control selective conditions: (A) “harmless spurious signal”,**

1002 **and (B) “no spurious signal”.** There is no clear evidence of a multimodal distribution of fitness  
1003 outcomes among replicates (left), and C1-FFLs occur equally in the 10 genotypes of the highest  
1004 fitness vs. the 10 genotypes of the lowest fitness (right), and so the entire distribution (left) was  
1005 used to produce **Fig 7**. Data are shown as mean $\pm$ SE over evolutionary replicates.

1006

### 1007 **S4 Fig. Fitness distribution of 115 evolutionary replicates under selection for filtering out short**

1008 **spurious signals, when the signal cannot directly regulate the effector.** The fitness of a  
1009 replicate is the average genotype fitness over the last 10,000 evolutionary steps. Colors indicate  
1010 replicates analyzed elsewhere.

1011

1012 **S5 Fig. Evolution when responding to a spurious signal is harmless, when the signal is not**  
1013 **allowed to directly regulate the effector. (A)** Fitness distribution of 60 replicate simulations.  
1014 The occurrence of both **(B)** FFL-in-diamonds and **(C)** isolated diamonds were similar in the 10  
1015 genotypes with the highest fitness vs. in 10 genotypes with the lowest fitness. Weak (two-  
1016 mismatch) TFBSs are included when scoring motifs. Data are shown as mean±SE over replicates.  
1017 Isolated C1-FFLs rarely evolve under this condition, therefore their occurrence is not plotted.  
1018  
1019 **S6 Fig. Evolution when there is no spurious signal, when the signal is not allowed to directly**  
1020 **regulate the effector. (A)** Fitness distribution of 50 replicate simulations. The occurrence of both  
1021 **(B)** FFL-in-diamonds and **(C)** isolated diamonds were similar in the 10 genotypes with the highest  
1022 fitness vs. in the 10 genotypes with the lowest fitness. Weak (two-mismatch) TFBSs are included  
1023 when scoring motifs. Data are shown as mean±SE over replicates. Isolated C1-FFLs rarely evolve  
1024 under this condition, therefore their occurrence is not plotted.  
1025  
1026 **S7 Fig. Selection for filtering out a short spurious signal is the primary way to evolve AND-**  
1027 **gated C1-FFLs (A), but AND-gated isolated diamonds also evolve in the absence of spurious**  
1028 **signals (B).** The signal is not allowed to directly regulate the effector, and the right hand sides of  
1029 **(A)** and **(B)** are identical to **Fig 11**. When scoring motifs, we either include (left) or exclude (right)  
1030 all two-mismatch TFBSs in the cis-regulatory sequences of intermediate TF genes and effector  
1031 genes. See **S1 Text** section 10 for the calculation of y-axis. Data are shown as mean±SE over  
1032 evolutionary replicates.  
1033  
1034 **S8 Fig. After removing the cost of gene expression, AND-gated C1-FFLs are still associated with**  
1035 **a successful response to selection for filtering out a short spurious signal.** The signal can

1036 directly regulate the effector genes. **(A)** Distribution of fitness outcomes across 46 replicate  
1037 simulations. **(B)** 10 out of 13 replicates with the highest fitness [the 13 replicates are in red in  
1038 **(A)**] still evolve AND-gated C1-FFLs. Replicates with the 4<sup>th</sup>, 6<sup>th</sup>, and 8<sup>th</sup> highest fitness evolve the  
1039 motif shown in **(C)** rather than AND-gated C1-FFLs. The “high-fitness” group therefore replace  
1040 the three replicates with replicates with the 11<sup>th</sup> to 13<sup>th</sup> highest fitness. Bars are mean±SE of the  
1041 occurrence over replicate evolutionary simulations. 5 replicates [blue in **(A)**] with the lowest  
1042 fitness do not contain AND-gated C1-FFLs or the motif in **(C)**. **(C)** AND-gated C1-FFLs with a long  
1043 arm. Note that both S and B need to be present to induce the expression of E, therefore this  
1044 motif can also act as spurious signal filter.

1045

1046 **S1 Text. Additional details of the model and algorithms**
