1           **Feed-forward regulation adaptively**  
2           **evolves via dynamics rather than**  
3           **topology when there is intrinsic noise**

4

5   **Short title:** Adaptive evolution of feed-forward regulation

6

7                           Kun Xiong<sup>1</sup>, Alex K. Lancaster<sup>2</sup>, Mark L. Siegal<sup>3</sup>, Joanna Masel<sup>4\*</sup>

8

9   <sup>1</sup> Department of Molecular and Cellular Biology, University of Arizona, Tucson, Arizona, United  
10 States of America

11   <sup>2</sup> Ronin Institute, Montclair, New Jersey, United States of America

12   <sup>3</sup> Center for Genomics and Systems Biology, Department of Biology, New York University, New  
13 York, New York, United States of America

14   <sup>4</sup> Department of Ecology and Evolutionary Biology, University of Arizona, Tucson, Arizona,  
15 United States of America

16

17   \* Corresponding author

18   Email: [masel@email.arizona.edu](mailto:masel@email.arizona.edu)

## 19 **Abstract**

20

21 We develop a null model of the evolution of transcriptional regulatory networks, and use it to  
22 support an adaptive origin for a canonical “motif”, a 3-node feed-forward loop (FFL)  
23 hypothesized to filter out short spurious signals by integrating information from a fast and a  
24 slow pathway. Our mutational model captures the intrinsically high prevalence of weak affinity  
25 transcription factor binding sites. We also capture stochasticity and delays in gene expression  
26 that distort external signals and intrinsically generate noise. Functional FFLs evolve readily under  
27 selection for the hypothesized function, but not in negative controls. Interestingly, a 4-node  
28 “diamond” motif also emerged as a short spurious signal filter. The diamond uses expression  
29 dynamics rather than path length to provide fast and slow pathways. When there is no external  
30 spurious signal to filter out, but only internally generated noise, only the diamond and not the  
31 FFL evolves.

## 32 Introduction

33

34 Transcriptional regulatory networks (TRNs) are integral to development and physiology, and  
35 underlie all complex traits. An intriguing finding about TRNs is that certain topological “motifs”  
36 of interconnected transcription factors (TFs) are over-represented relative to random re-wirings  
37 that preserve the frequency distribution of connections. The significance of this finding remains  
38 open to debate.

39

40 The canonical example is the feed-forward loop (FFL), in which TF A regulates a target C both  
41 directly, and indirectly via TF B, and no regulatory connections exist in the opposite direction<sup>1-3</sup>.  
42 Each of the three regulatory interactions in a FFL can be either activating or repressing, so there  
43 are eight distinct kinds of FFLs (**Fig. S1**)<sup>4</sup>. Given the eight frequencies expected from the ratio of  
44 activators to repressors, two of these kinds of FFLs are significantly over-represented<sup>4</sup>. In this  
45 paper, we focus on one of these two over-represented types, namely the type 1 coherent FFL  
46 (C1-FFL), in which all three links are activating rather than repressing (**Fig. S1**, top left). C1-FFL  
47 motifs are an active part of systems biology research today, e.g. they are used to infer the  
48 function of specific regulatory pathways<sup>5, 6</sup>.

49

50 The over-representation of FFLs in observed TRNs is normally explained in terms of selection  
51 favoring a function of FFLs. Specifically, the most common adaptive hypothesis is that cells often  
52 benefit from ignoring short-lived signals and responding only to durable signals<sup>3, 4, 7</sup>. Evidence  
53 that C1-FFLs can perform this function comes from the behavior both of theoretical models<sup>4</sup> and  
54 of *in vivo* gene circuits<sup>7</sup>. A C1-FFL can achieve this function when its regulatory logic is that of an  
55 “AND” gate, i.e. both the direct path from A to C and the indirect path from A to B to C must be

56 activated before the response is triggered. In this case, the response will only be triggered if, by  
57 the time the signal trickles through the longer path, it is still active on the shorter path as well.  
58 This yields a response to long-lived signals but not short-lived signals.

59

60 However, just because a behavior is observed, we cannot conclude that the behavior is a  
61 historical consequence of past selection favoring that behavior<sup>8,9</sup>. The explanatory power of this  
62 adaptive hypothesis of filtering out short-lived and spurious signals needs to be compared to  
63 that of alternative, non-adaptive hypotheses<sup>10</sup>. The over-representation of C1-FFLs might be a  
64 byproduct of some other behavior that was the true target of selection<sup>11</sup>. Alternatively, it might  
65 be an intrinsic property of TRNs generated by mutational processes – gene duplication patterns  
66 have been found to enrich for FFLs in general<sup>12</sup>, although not yet C1-FFLs in particular.

67 Adaptationist claims about TRN organization have been accused of being just-so stories, with  
68 adaptive hypotheses still in need of testing against an appropriate null model of network  
69 evolution<sup>13-23</sup>.

70

71 Here we develop such a computational null model of TRN evolution, and apply it to the case of  
72 C1-FFL over-representation. We include sufficient realism in our model of cis-regulatory  
73 evolution to capture the non-adaptive effects of mutation in shaping TRNs. In particular, we  
74 consider “weak” TF binding sites (TFBSs) that can easily appear *de novo* by chance alone, and  
75 from there be selected to bind a TF more strongly, as well as simulating mutations that duplicate  
76 and delete genes.

77

78 We also capture the stochasticity of gene expression, which causes the number of mRNAs and  
79 hence proteins to fluctuate<sup>24,25</sup>. This is important, because demand for spurious signal filtering

80 and hence C1-FFL function may arise not just from external signals, but also from internal  
81 fluctuations. Stochasticity in gene expression also shapes how external spurious signals are  
82 propagated. Stochasticity is a constraint on what TRNs can achieve, but it can also be adaptively  
83 co-opted in evolution<sup>26</sup>; either way, it might underlie the evolution of certain motifs. Most other  
84 computational models of TRN evolution that consider gene expression as the major phenotype  
85 do not simulate stochasticity in gene expression (but see three notable exceptions<sup>27-29</sup>).

86

87 Here we ask whether AND-gated C1-FFLs evolve as a response to selection for filtering out short  
88 and spurious external signals. Our new model allows us to compare the frequencies of network  
89 motifs arising in the presence of this hypothesized evolutionary cause to motif frequencies  
90 arising under non-adaptive control simulations, i.e. evolution under conditions that lack short  
91 spurious external signals while controlling both for mutational biases and for less specific forms  
92 of selection. We also ask whether other network motifs evolve to filter out short spurious  
93 signals, and if so, whether different conditions favor the appearance of different motifs during  
94 evolution.

95

## 96 **Model overview**

97

98 We simulate the dynamics of TRNs as the TFs activate and repress one another's transcription  
99 over developmental time, to generate gene expression phenotypes on which selection then acts  
100 over longer evolutionary timescales. For each moment in developmental time, we simulate the  
101 numbers of nuclear and cytoplasmic mRNAs in a cell, the protein concentrations, and the  
102 chromatin state of each gene in a haploid genome. Transitions between three possible  
103 chromatin states -- Repressed, Intermediate, and Active -- are a stochastic function of TF

104 binding, and transcription initiation from the Active state is also stochastic. An overview of the  
105 model is shown in **Fig. 1**. The pattern of TF binding affects chromatin, which affects transcription  
106 rates, eventually feeding back to affect the concentration of TFs and hence their binding. The  
107 genotype is specified by a set of cis-regulatory sequences that contain TFBSs to which TFs may  
108 bind, by which consensus sequence each TF recognizes and with what affinity, and by 5 gene-  
109 specific parameters that control gene expression as a function of TF binding: mean duration of  
110 transcriptional bursts, mRNA degradation, protein production, and protein degradation rates,  
111 and gene length (which affects delays in transcription and translation). An external signal (**Fig.**  
112 **1A red**) is treated like another TF, and the concentration of an effector gene (**Fig. 1A blue**) in  
113 response is a primary determinant of fitness, combined with a cost associated with gene  
114 expression (**Fig. 1B**). Mutants replace resident genotypes as a function of the difference in  
115 estimated fitness (**Fig. 1C**). Parameter values, taken as far as possible from *Saccharomyces*  
116 *cerevisiae*, are summarized in **Table S1**. Source code in C is available at  
117 <https://github.com/MaselLab/network-evolution-simulator>.

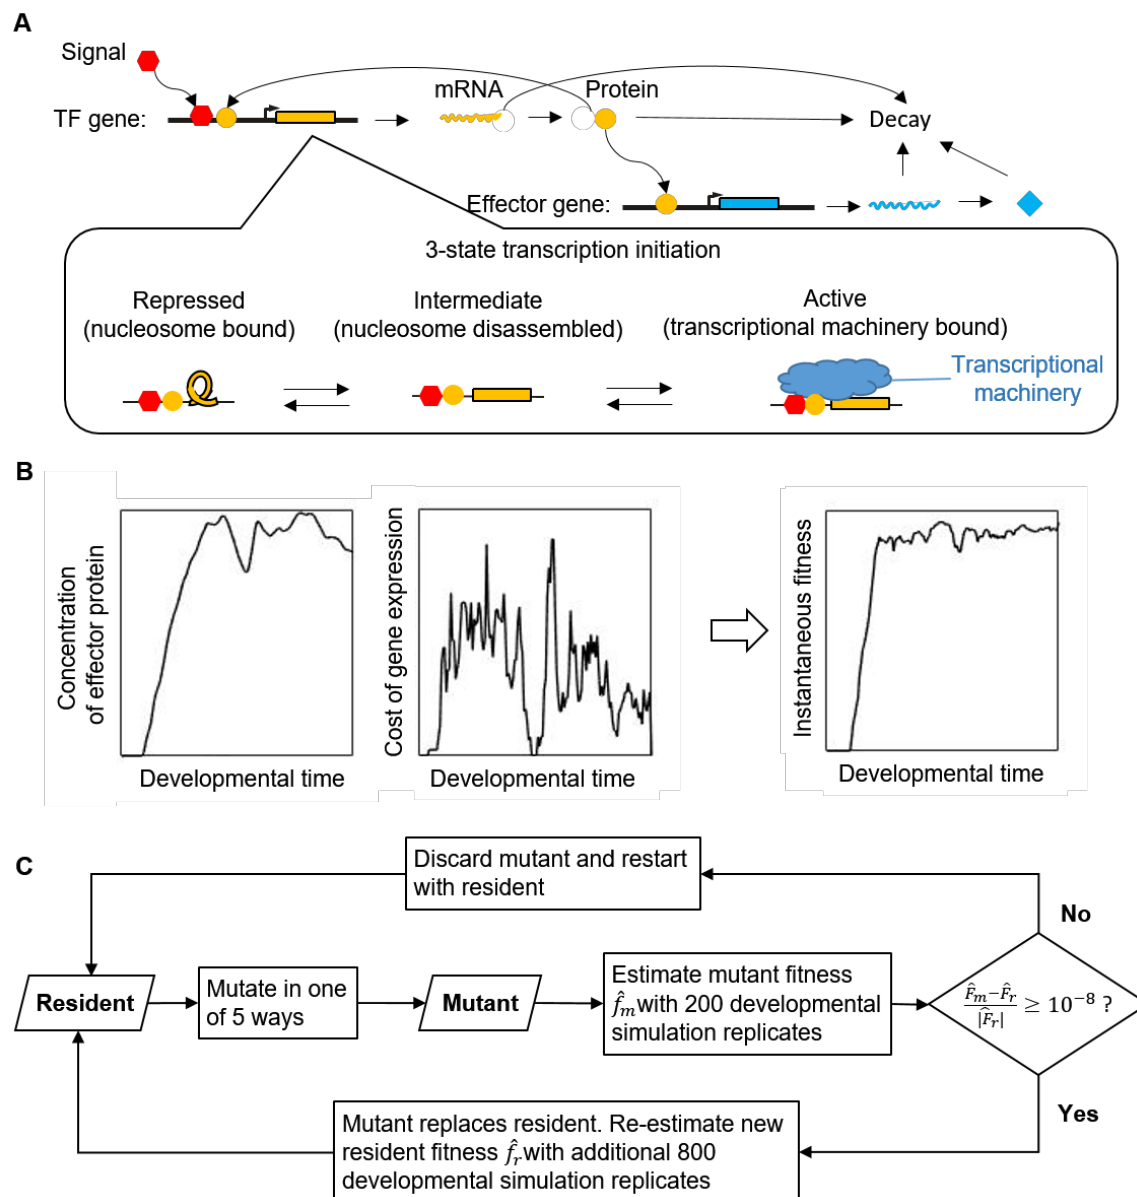

118

119 **Figure 1. Overview of the model. (A) Simulation of gene expression phenotypes.** We show a  
 120 simple TRN with one TF (yellow) and one effector gene (blue), with arrows for major biological  
 121 processes simulated in the model. **(B) Phenotype-fitness relationship.** Fitness is primarily  
 122 determined by the concentration of an effector protein (here shown as beneficial as in Eq. 1, but  
 123 potentially deleterious in a different environment as in Eq. 2), with a secondary component  
 124 coming from the cost of gene expression (proportional to the rate of protein production),  
 125 combined to give an instantaneous fitness at each moment in developmental time. **(C)**  
 126 **Evolutionary simulation.** A single resident genotype is replaced when a mutant's estimated  
 127 fitness is high enough. Stochastic gene expression adds uncertainty to the estimated fitness,  
 128 allowing less fit mutants to occasionally replace the resident, capturing the flavor of genetic  
 129 drift.

130 **Transcription factor binding**

131

132 Transcription of each gene is controlled by TFBSs present within a 150-bp cis-regulatory region.

133 When bound, a TF occupies a stretch of DNA 14 bp long. In the center of this stretch, each TF

134 recognizes an 8-bp consensus sequence, and binds to it with a TF-specific (and mutable)

135 dissociation constant  $K_d(0)$ . TFs also bind somewhat specifically when there are one or two

136 mismatches, with  $K_d(1)$  and  $K_d(2)$  values calculated from  $K_d(0)$  according to a model of

137 approximately additive binding energy per base pair. With three mismatches, binding occurs at

138 the same background affinity as to any 14 bp stretch of DNA. We model competition between a

139 smaller number of specific higher-affinity binding sites and the much larger number of non-

140 specific binding sites, the latter corresponding to the total amount of nucleosome-free sequence

141 in *S. cerevisiae*. Competition with non-specific binding can be approximated by using an

142 effective dissociation constant  $\hat{K}_d = 10K_d$ . See Supplementary Text Section 1 for justification

143 and details of these model choices.

144

145 Each TF is either an activator or a repressor. The algorithm for obtaining the probability

146 distribution for  $A$  activators and  $R$  repressors being bound to a given cis-regulatory region at a

147 given moment in developmental time is described in Supplementary Text Section 2.

148

149 **Transcriptional regulation**

150

151 Activation of the effector gene requires at least two TFBSs to be occupied by activators – not

152 necessarily different activators. The requirement for two activators makes the effector gene

153 capable of evolving an AND-gate via a configuration of TFBSs in which the only way to have two



154 TFs bound is for them to be different TFs (**Fig. 2**). All other genes are AND-gate-incapable,  
 155 meaning that their activation requires only one TFBS to be occupied by an activator.  $P_A$  denotes  
 156 the probability of having at least one activator bound for an AND-gate-incapable gene, or two  
 157 for an AND-gate-capable gene.  $P_R$  denotes the probability of having at least one repressor  
 158 bound.

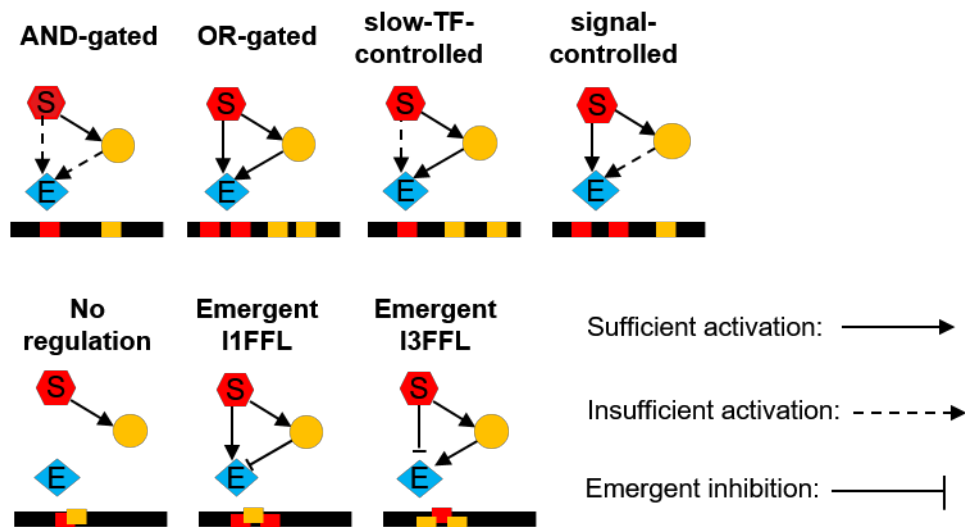

159 **Figure 2. The numbers of TFBSs, and any hindrance between them, determine the regulatory**  
 160 **logic of effector expression.** We use the pattern of TFBSs (red and yellow bars along black cis-  
 161 regulatory sequences) to classify the regulatory logic of the effector gene. C1-FFLs are classified  
 162 first by whether or not they are capable of simultaneously binding the signal and the TF (top vs  
 163 bottom). Further classification is based on whether either the signal or the TF has multiple non-  
 164 overlapping TFBSs, allowing it to activate the effector without help from the other (solid arrow).  
 165 The three subtypes on the bottom (where the signal and TF cannot bind simultaneously) are  
 166 rarely seen; they are unless otherwise indicated included in “Any logic” and “non-AND-gated”  
 167 tallies, but are not analyzed separately. Two of them involve emergent repression, creating  
 168 “incoherent” feed-forward loops (see **Fig. S1** for full FFL naming scheme). Emergent repression  
 169 occurs when the binding of one activator to its only TFBS prevents the other activator from  
 170 binding to either of its two TFBSs, hence preventing simultaneous binding of two activators.  
 171

172 Noise in yeast gene expression is well described by a two step process of transcriptional  
173 activation<sup>30,31</sup>, e.g. nucleosome disassembly followed by transcription machinery assembly. We  
174 denote the three corresponding possible states of the transcription start site as Repressed,  
175 Intermediate, and Active (**Fig. 1A**). Transitions between the states depend on the numbers of  
176 activator and repressor TFs bound (e.g. via recruitment of histone-modifying enzymes<sup>32,33</sup>). We  
177 make conversion from Repressed to Intermediate a linear function of  $P_A$ , ranging from the  
178 background rate  $0.15 \text{ min}^{-1}$  of histone acetylation<sup>34</sup> (presumed to be followed by nucleosome  
179 disassembly), to the rate of nucleosome disassembly  $0.92 \text{ min}^{-1}$  for the constitutively active  
180 PHO5 promoter<sup>30</sup>:

181

$$182 \quad r_{Rep\_to\_Int} = 0.92P_A + 0.15(1 - P_A).$$

183

184 We make conversion from Intermediate to Repressed a linear function of  $P_R$ , ranging from a  
185 background histone de-acetylation rate of  $0.67 \text{ min}^{-1}$ <sup>[34]</sup>, up to a maximum of  $4.11 \text{ min}^{-1}$  (the  
186 latter chosen so as to keep a similar maximum:basal rate ratio as that of  $r_{Rep\_to\_Int}$ ):

187

$$188 \quad r_{Int\_to\_Rep} = 4.11P_R + 0.67(1 - P_R).$$

189

190 We assume that repressors disrupt the assembly of transcription machinery<sup>35</sup> to such a degree  
191 that conversion from Intermediate to Active does not occur if even a single repressor is bound.

192 In the absence of repressors, activators facilitate the assembly of transcription machinery<sup>36</sup>.

193 Brown et al.<sup>30</sup> reported that the rate of transcription machinery assembly is  $3.3 \text{ min}^{-1}$  for a  
194 constitutively active PHO5 promoter, and  $0.025 \text{ min}^{-1}$  when the Pho4 activator of the PHO5  
195 promoter is knocked out. We use this range to set

196

197 
$$r_{Int\_to\_Act} = 3.3P_{A\_no\_R} + 0.025P_{notA\_no\_R}$$

198

199 where  $P_{A\_no\_R}$  is the probability of having no repressors and either one (for an AND-gate-  
200 incapable gene) or two (for an AND-gate-capable gene) activators bound, and  $P_{notA\_no\_R}$  is the  
201 probability of having no TFs bound (for AND-gate-incapable genes) or having no repressors and  
202 not more than one activator bound (for AND-gate-capable genes).

203

204 The promoter sequence not only determines which specific TFBSs are present, but also  
205 influences non-specific components of the transcriptional machinery<sup>37, 38</sup>. We capture this via  
206 gene-specific but TF-binding-independent rates  $r_{Act\_to\_Int}$  with which the machinery disassembles  
207 and a burst of transcription ends. In other words, we let TF binding regulate the frequency of  
208 “bursts” of transcription, while other properties of the cis-regulatory region regulate their  
209 duration. For example, the yeast transcription factor Pho4 regulates the frequency but not  
210 duration of bursts of PHO5 expression, by regulating the rates of nucleosome removal and of  
211 transition to but not from a transcriptionally active state<sup>30</sup>. Parameterization of  $r_{Act\_to\_Int}$  is  
212 described in Supplementary Text Section 3.

213

#### 214 **mRNA and protein dynamics**

215

216 All genes in the Active state initiate new transcripts stochastically at rate  $r_{max\_transc\_init} = 6.75$   
217 mRNA/min<sup>30</sup>, while the time for completing transcription depends on gene length (see  
218 Supplementary Text Section 4 for parameterization of gene length and associated delay times).  
219 We model a second delay before a newly completed transcript produces the first protein, which

220 we assume is dominated by translation initiation (length-independent) plus elongation (length-  
221 dependent) and not splicing or mRNA export (see Supplementary Text Section 5). After the  
222 second delay, we model protein production as continuous at a gene-specific rate  $r_{protein\_syn}$  (see  
223 Supplementary Text Section 5).

224

225 Protein transport into the nucleus is rapid<sup>39</sup> and is approximated as instantaneous and  
226 complete, so that the newly produced protein molecules immediately increase the probability of  
227 TF binding. Each gene has its own mRNA and protein decay rates, initialized from distributions  
228 taken from data (see Supplementary Text Section 6).

229

230 All the rates regarding transcription and translation are listed in **Table S1**, including distributions  
231 estimated from data, and hard bounds imposed to prevent unrealistic values arising during  
232 evolutionary simulations.

233

### 234 **Developmental simulation**

235

236 Our algorithm is part stochastic, part deterministic. We use a Gillespie algorithm<sup>40</sup> to simulate  
237 stochastic transitions between Repressed, Intermediate, and Active chromatin states, and to  
238 simulate transcription initiation and mRNA decay events. Fixed (i.e. deterministic) delay times  
239 are simulated between transcription initiation and completion, and between transcript  
240 completion and the production of the first protein. Protein production and degradation are  
241 described deterministically with ODEs, and updated frequently in order to recalculate TF  
242 concentrations and hence chromatin transition rates. Details of our simulation algorithm are

243 given in the Supplementary Text Section 7. We initialize developmental simulations with no

244 mRNA or protein, and all genes in the Repressed state.

245

## 246 **Selection**

247

248 Filtering out short spurious signals is a special case of signal recognition. In environment 1,

249 expressing the effector is beneficial, and in environment 2 it is deleterious. We select for TRNs

250 that take information from the signal and correctly decide whether to express the effector.

251 Fitness is a weighted average across separate developmental simulations in the two

252 environments, one with a signal and one without. In both cases, we begin each developmental

253 simulation with no signal. To ensure that gene expression changes in response to the signal, and

254 not via an internal timer, we simulate a burn-in phase with duration drawn from an exponential

255 distributed truncated at 30 minutes, with un-truncated mean of 10 minutes. By having no fitness

256 effects of gene expression during the burn-in, we eliminate a significant source of noise in

257 fitness estimation due to variable burn-in duration. In our control condition, at the end of the

258 burn-in, the signal suddenly switches to a constant “on” level in environment 1, and remains off

259 in environment 2. In our test condition (**Fig. 3**), the signal is turned on in the same way in

260 environment 1 but is also briefly turned on (for the first 10 minutes after the burn-in) in

261 environment 2 – selection is to ignore this short spurious signal. The signal is treated as though

262 it were an activating TF whose concentration is controlled externally, with an “off”

263 concentration of zero and an “on” concentration of 1,000 molecules per cell, which is the typical

264 per-cell number of a yeast TF<sup>41</sup>.

265

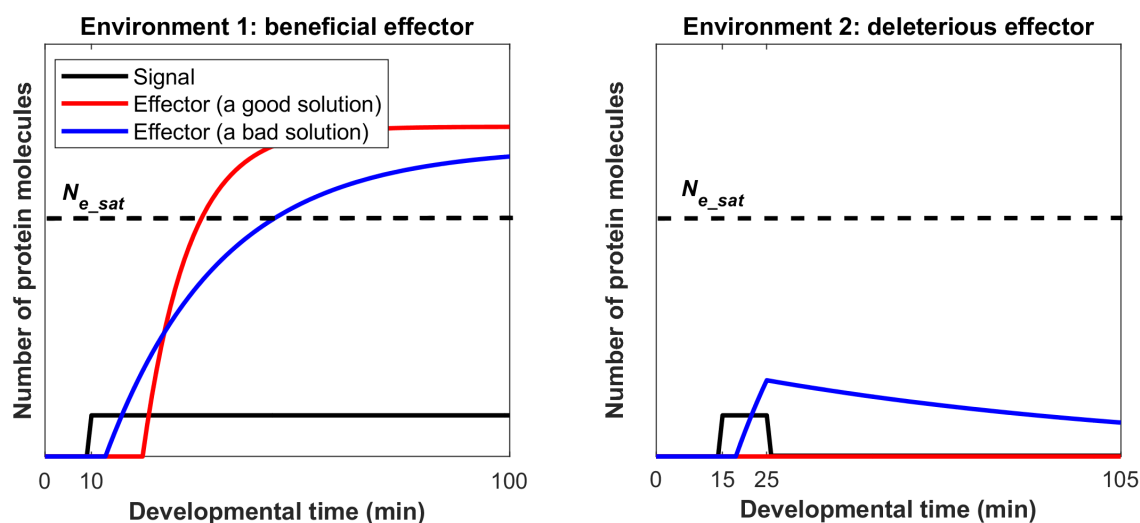

266

267 **Figure 3. Selection for filtering out short spurious signals.** Each selection condition averages

268 fitness across simulations in two environments. The effectors have different fitness effects in

269 the two environments, and the signal also behaves differently in the two environments.

270 Simulations begin with zero mRNA and protein, and all genes at the Repressed state. Each

271 simulation is burned in for a randomly sampled length of time in the absence of signal (shown

272 here as 10 minutes in environment 1, and 15 minutes in environment 2), and continues for

273 another 90 minutes after the burn-in. The signal is shown in black. Red illustrates a good

274 solution in which the effector responds appropriately in each of the environments, while blue

275 shows an inferior solution. See **Fig. S2** for examples of high-fitness and low-fitness evolved

276 phenotypes, where, as shown in this schematic, high-fitness solutions have longer delays

277 followed by more rapid responses thereafter.

278

279 We make fitness quantitative in terms of a “benefit”  $B(t)$  as a function of the amount of

280 effector protein  $N_e(t)$  at developmental time  $t$ . Our motivation is a scenario in which the effector

281 protein is responsible for directing resources from a metabolic program favored in environment

282 2 to a metabolic program favored in environment 1. In environment 1, where the effector

283 produces benefits,

284

$$285 \quad B(t) = \begin{cases} b_{max} \frac{N_e(t)}{N_{e\_sat}}, & N_e(t) < N_{e\_sat} \\ b_{max}, & N_e(t) \geq N_{e\_sat} \end{cases}, \quad (1)$$

286

287 where  $b_{max}$  is the maximum benefit if all resources were redirected, and  $N_{e\_sat}$  is the minimum

288 amount of effector protein needed to achieve this. Similarly, in environment 2

289

$$290 \quad B(t) = \begin{cases} b_{max} - b_{max} \frac{N_e(t)}{N_{e\_sat}}, & N_e(t) < N_{e\_sat} \\ 0, & N_e(t) \geq N_{e\_sat} \end{cases}. \quad (2)$$

291

292 We set  $N_{e\_sat}$  to 10,000 molecules, which is about the average number of molecules of a

293 metabolism-associated protein per cell in yeast<sup>41</sup>. Without loss of generality given that fitness is

294 relative, we set  $b_{max}$  to 1.

295

296 A second contribution to fitness comes from the cost of gene expression  $C(t)$  (**Fig. 1B, middle**).

297 We make this cost proportional to the total protein production rate. We estimate a fitness cost

298 of gene expression of  $2 \times 10^{-6}$  per protein molecule translated per minute, based on the cost of

299 expressing a non-toxic protein in yeast<sup>42</sup> (see Supplementary Text Section 7 for details).

300

301 We simulate gene expression for 90 minutes plus the duration of the burn-in (**Fig. 3**). A “cellular

302 fitness” in a given environment is calculated as the average instantaneous fitness  $B(t)-C(t)$  over

303 the 90 minutes. We consider environment 2 to be twice as common as environment 1 (a

304 “signal” should be for an uncommon event rather than the default), and take the corresponding  
305 weighted average.

306

### 307 **Evolutionary simulation**

308

309 We simulate a novel version of origin-fixation (weak-mutation-strong-selection) evolutionary  
310 dynamics, i.e. the population contains only one resident genotype at any time, and mutant  
311 genotypes are either rejected or chosen to be the next resident (Fig. 1C). Despite the fact that  
312 our mutant acceptance rule (see below) was chosen to maximize computational efficiency, our  
313 model usually takes 10 CPUs 1-3 days to complete an evolutionary simulation; modeling a  
314 heterogeneous population is clearly out of the question. We note that genetic homogeneity  
315 entails ignoring some important population genetic phenomena. First, if there were  
316 recombination, heterogeneity would favor mutations that combine well with a range of other  
317 genotypes. Second, clonal interference would shift evolution toward beneficial mutations of  
318 larger effect<sup>43</sup> (an effect we can mimic by modifying the value  $10^{-8}$  in the equation below). Third,  
319 polymorphic populations would evolve mutational robustness<sup>44</sup>. None of these three effects  
320 seems *a priori* likely to change our conclusions, although the possibility cannot be ruled out.

321

322 Estimators  $\hat{F}$  of genotype fitness are averages of the cellular fitness values of 200  
323 developmental replicates per environment in the case of the mutant, plus an additional 800  
324 should it be chosen to be the next resident. The mutant replaces the resident if

325

$$326 \quad \frac{\hat{F}_{mutant} - \hat{F}_{resident}}{|\hat{F}_{resident}|} \geq 10^{-8}.$$

327



328 This differs from Kimura's<sup>45</sup> equation for fixation probability, but captures the flavor of genetic  
329 drift. Genetic drift allows slightly deleterious mutations to occasionally fix, and beneficial  
330 mutations to sometimes fail to do so, even as the probability of fixation is monotonic with  
331 fitness. This is also achieved by our procedure, because of stochastic deviations of  $\hat{F}$  from true  
332 genotype fitness. The number of developmental replicates captures the flavor of effective  
333 population size.

334

335 Note that it is possible, especially at the beginning of an evolutionary simulation, for relative  
336 fitness to be paradoxically negative. This occurs when a randomly initialized genotype does not  
337 express the effector (garnering no fitness benefit), but does express other genes (accruing a cost  
338 of expression); this combination makes fitness negative. In this rare case, for simplicity, we use  
339 the absolute value of  $\hat{F}$  on the denominator.

340

341 If 2,000 successive mutants are all rejected, the simulation is terminated; upon inspection, we  
342 found that these resident genotypes had evolved to not express the effector in either  
343 environment. We refer to each change in resident genotype as an evolutionary step. We stop  
344 the simulation after 50,000 evolutionary steps; at this time, most replicate simulations seem to  
345 have reached a fitness plateau (**Fig. S3**); we analyze all replicates except those terminated early.  
346 To reduce the frequency of early termination in the case where the signal was not allowed to  
347 directly regulate the effector, we used a burn-in phase selecting on a more accessible  
348 intermediate phenotype (see Supplementary Text Section 10). In this case, burn-in occurred for  
349 1,000 evolutionary steps, followed by the usual 50,000 evolutionary steps with selection for the  
350 phenotype of interest (**Fig. S3**, right panels). Most replicates found a stable fitness plateau

351 within 10,000 evolutionary steps, although some replicates were temporarily trapped at a low  
352 fitness plateau (**Fig. S3**).

353

### 354 **Genotype Initialization**

355

356 We initialize genotypes with 3 activator genes, 3 repressor genes, and 1 effector gene. Cis-  
357 regulatory sequences and consensus binding sequences contain As, Cs, Gs, and Ts sampled with  
358 equal probability. Rate constants associated with the expression of each gene are sampled from  
359 the distributions summarized in **Table S1**.

360

### 361 **Mutation**

362

363 A genotype is subjected to 5 broad classes of mutation, at rates summarized in **Table S2** and  
364 justified in Supplementary Text Section 9. First are single nucleotide substitutions in the cis-  
365 regulatory sequence; the resident nucleotide mutates into one of the other three types of  
366 nucleotides with equal probability. Second are single nucleotide changes to the consensus  
367 binding sequence of a TF, with the resident nucleotide mutated into recognizing one of the  
368 other three types with equal probability. Both of these types of mutation can affect the number  
369 and strength of TFBSs.

370

371 Third are gene duplications or deletions. Because computational cost scales steeply (and non-  
372 linearly) with network size, we do not allow effector genes to duplicate once there are 5 copies,  
373 nor TF genes to duplicate once the total number of TF gene copies is 19. We also do not allow  
374 the signal, the last effector gene, nor the last TF gene to be deleted.

375

376 Fourth are mutations to gene-specific expression parameters. Most of these ( $L$ ,  $r_{Act\_to\_Int}$ ,  
377  $r_{protein\_syn}$ ,  $r_{mRNA\_deg}$ , and  $r_{protein\_deg}$ ) apply to both TFs and effector genes, while mutations to the  
378 gene-specific values of  $K_d(0)$  apply only to TFs. Each mutation to  $L$  increases or decreases it by 1  
379 codon, with equal probability unless  $L$  is at the upper or lower bound. Effect sizes of mutations  
380 to the other five parameters are modeled in such a way that mutation would maintain specified  
381 log-normal stationary distributions for these values, in the absence of selection or arbitrary  
382 bounds (see Supplementary Text Section 9 for details). Upper and lower bounds (Supplementary  
383 Text Section 9) are used to ensure that selection never drives these parameters to unrealistic  
384 values.

385

386 Fifth is conversion of a TF from being an activator to being a repressor, and vice versa. The signal  
387 is always an activator, and does not evolve.

388

389 Importantly, this scheme allows for divergence following gene duplication. When duplicates  
390 differ due only to mutations of class 4, i.e. protein function is unchanged, we refer to them as  
391 “copies” of the same gene, encoding “protein variants”. Mutations in classes 2 and 5 can create  
392 a new protein.

393

394 **Table S3** summarizes the tendencies of different mutation types to be accepted, and to  
395 contribute to evolution. Acceptance rates are high, indicative of substantial nearly neutral  
396 evolution, in which slightly deleterious mutations are fixed and subsequently compensated for.

397

## 398 **Results**

399 **Functional AND-gated C1-FFLs evolve readily under selection for filtering out a short spurious**

400 **signal**

401

402 We begin by simulating the easiest case we can devise to allow the evolution of C1-FFLs for their

403 purported function of filtering out short spurious signals. The signal is allowed to act directly on

404 the effector, after which all that needs to evolve is a single activating TF between the two, as

405 well as AND-logic for the effector (**Fig. 2**, top left; see “Transcriptional regulation” in the Model

406 Overview for how AND-logic evolution is handled). We score network motifs at the end of a set

407 period of evolution (see Supplemental Text Section 11 for details), further classifying evolved

408 C1-FFLs into subtypes based on the presence of non-overlapping TFBSs (**Fig. 2**). The adaptive

409 hypothesis predicts the evolution of the C1-FFL subtype with AND-regulatory logic, which

410 requires the effector to be stimulated both by the signal and by the slow TF. While all

411 evolutionary replicates show large increases in fitness, the extent of improvement varies

412 dramatically, indicating whether or not the replicate was successful at evolving the phenotype

413 of interest rather than becoming stuck at an alternative locally optimal phenotype (**Fig. 4A**).

414 AND-gated C1-FFLs frequently evolve in replicates that reach high fitness outcomes, but not

415 replicates that reach lower fitness (**Fig. 4B**).

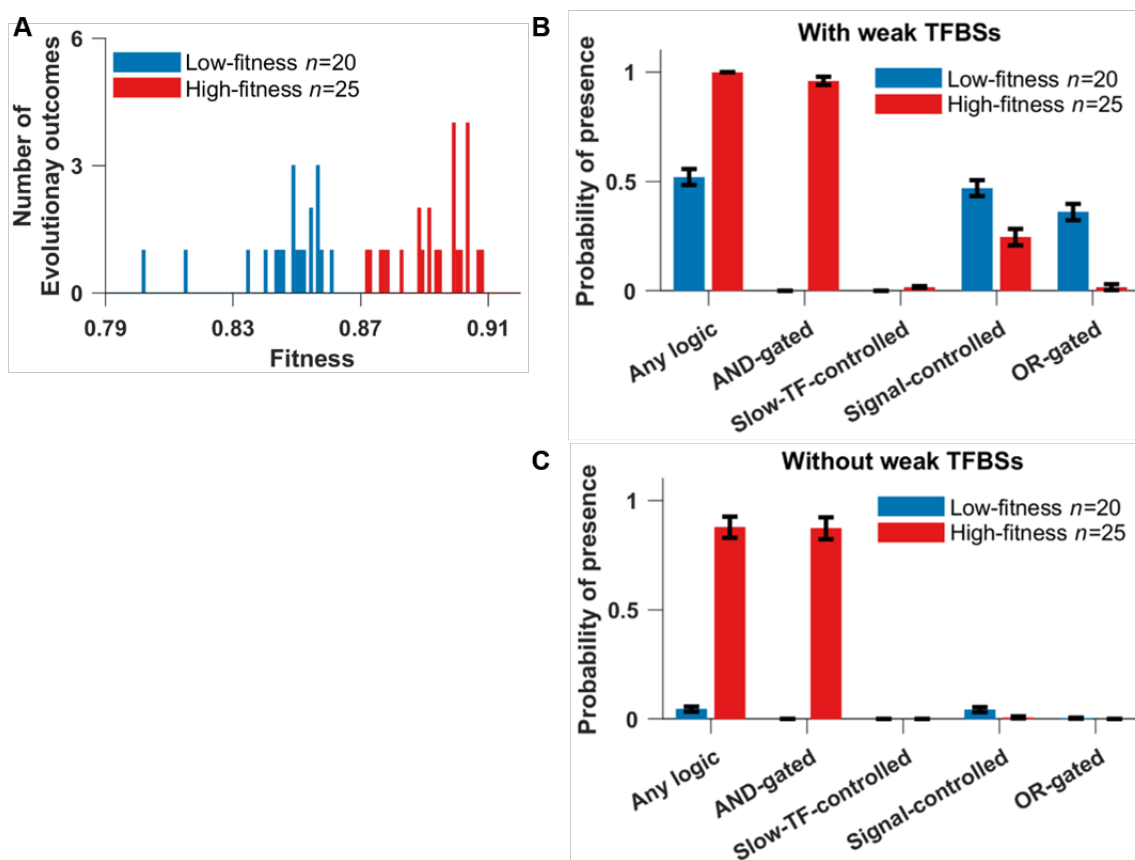

416 **Figure 4. AND-gated C1-FFLs are associated with a successful response to selection for filtering**  
 417 **out short spurious signals. (A)** Distribution of fitness outcomes across replicate simulations,  
 418 calculated as the average fitness over the last 10,000 steps of the evolutionary simulation. We  
 419 divide genotypes into a low-fitness group (blue) and a high-fitness group (red) using as a  
 420 threshold an observed gap in the distribution. **(B)** High fitness replicates are characterized by the  
 421 presence of an AND-gated C1-FFL. “Any logic” counts the presence of any of the seven subtypes  
 422 shown in **Fig. 2B**. Because one TRN can contain multiple C1-FFLs of different subtypes, each of  
 423 which are scored, the sum of the occurrences of all seven subtypes will generally be more than  
 424 “Any logic”. See Supplementary Text Section 11 for details on the calculation of the y-axis. **(C)**  
 425 The over-representation of AND-gated C1-FFLs becomes even more pronounced relative to  
 426 alternative logic-gating when weak (two-mismatch) TFBSs are excluded while scoring motifs.  
 427 Data are shown as mean±SE of the occurrence over replicate evolution simulations.

428 We also see C1-FFLs that, contrary to expectations, are not AND-gated. Non-AND-gated motifs  
429 are found more often in low fitness than high fitness replicates (**Fig. 4B**), indicating that the  
430 preference for AND-gates is associated with adaptation rather than mutation bias. However,  
431 some non-AND-gated motifs are still found even in the high fitness replicates. This is because  
432 motifs and their logic gates are scored on the basis of all TFBSs, even those with two  
433 mismatches and hence low binding affinity. Unless these weak TFBSs are deleterious, they will  
434 appear quite often by chance alone. A random 8-bp sequence has probability  $\binom{8}{2} \times 0.25^6 \times$   
435  $0.75^2 = 0.0038$  of being a two-mismatch binding site for a given TF. In our model, a TF has the  
436 potential to recognize 137 different sites in a 150-bp cis-regulatory sequence (taking into  
437 account steric hindrance at the edges), each with 2 orientations. Thus, by chance alone a given  
438 TF will have  $0.0038 \times 137 \times 2 \approx 1$  two-mismatch binding sites in a given cis-regulatory  
439 sequence (ignoring palindromes for simplicity), compared to only  $\sim 0.1$  one-mismatch TFBSs.  
440 Non-AND-gated C1-FFLs mostly disappear when two-mismatch TFBSs are excluded, but the  
441 AND-gated C1-FFLs found in high fitness replicates do not (**Fig. 4C**).

442

443 To confirm the functionality of these AND-gated C1-FFLs, we mutated the evolved genotype in  
444 two different ways (**Fig. 5A**) to remove the AND regulatory logic. As expected, this lowers fitness  
445 in the presence of the short spurious signal but increases fitness in the presence of constant  
446 signal, with a net reduction in fitness (**Fig. 5B**). This is consistent with AND-gated C1-FFLs  
447 representing a tradeoff, by which a more rapid response to a true signal is sacrificed in favor of  
448 the greater reliability of filtering out short spurious signals.

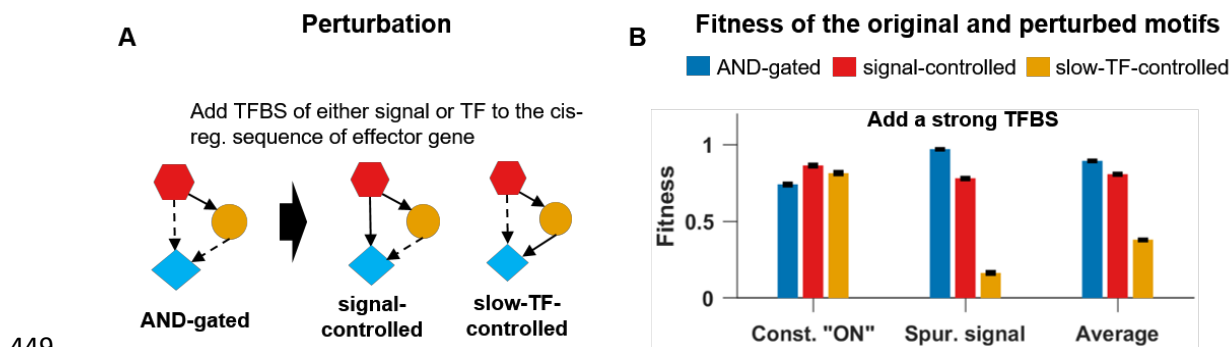

449

450 **Figure 5. Destroying the AND-logic of a C1-FFL removes its ability to filter out short spurious**

451 **signals. (A)** For each of the  $n = 25$  replicates in the high fitness group in **Fig. 4**, we perturbed the

452 AND-logic in two ways, by adding one binding site of either the signal or the slow TF to the cis-

453 regulatory sequence of the effector gene. **(B)** For each replicate, the fitness of the original motif

454 (blue) or of the perturbed motif (red or orange) was averaged across the subset of evolutionary

455 steps with an AND-gated C1-FFL and lacking other potentially confounding motifs (see

456 Supplementary Text Section 11 for details). Destroying the AND-logic slightly increases the

457 ability to respond to the signal, but leads to a larger loss of fitness when short spurious signals

458 are responded to. Fitness is shown as mean $\pm$ SE over replicate evolutionary simulations.

459

460 Adaptive motifs are constrained not only in their topology and regulatory logic, but also in the

461 parameter space of their component genes. In particular, there is selection for rapid synthesis of

462 both effector and TF proteins, as well as rapid degradation of effector mRNA and protein (**Table**

463 **S4**). Fast effector degradation reduces the transient expression induced by the short spurious

464 signal (**Fig. S2**).

465

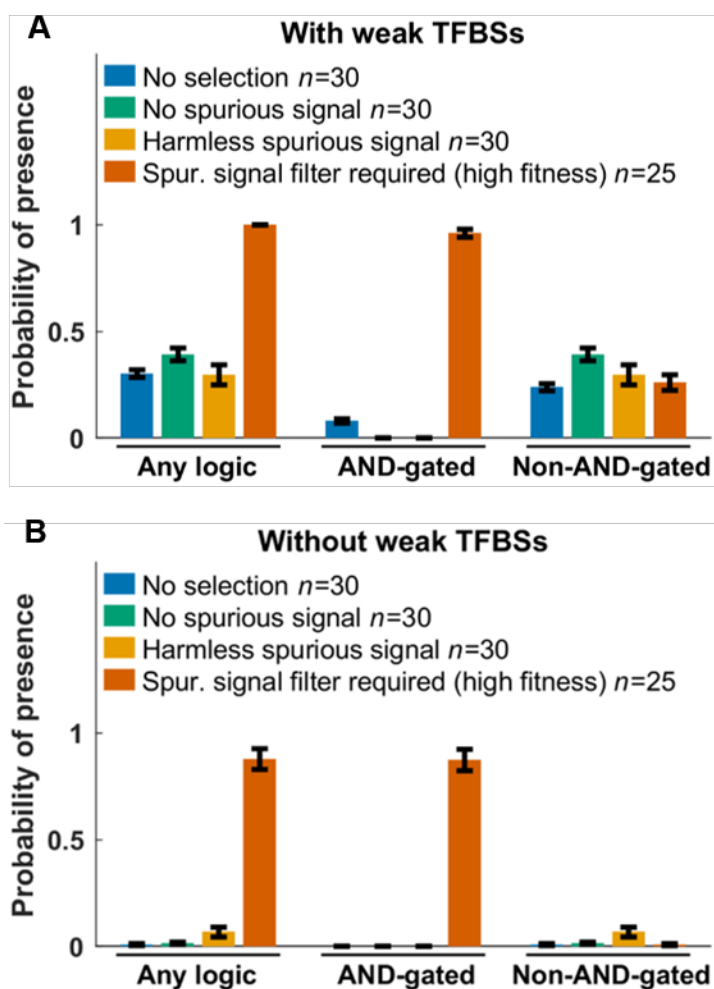

466

467 **Figure 6. Selection for filtering out short spurious signals is the primary cause of C1-FFLs.** TRNs

468 are evolved under different selection conditions, and we score the probability that at least one

469 C1-FFL is present (Supplementary Text Section 11). Weak (two-mismatch) TFBSs are included **(A)**

470 or excluded **(B)** during motif scoring. Data are shown as mean $\pm$ SE over evolutionary replicates.

471 C1-FFL occurrence is similar for high-fitness and low-fitness outcomes in control selective

472 conditions **(Fig. S4)**, and so all evolutionary outcomes were combined. “Spurious signal filter

473 required (high fitness)” uses the same data as in **Fig. 4**.

474

475 To test the extent to which AND-gated C1-FFLs are a specific response to selection to filter out

476 short spurious signals, we simulated evolution under three negative control conditions: 1) no



477 selection, i.e. all mutations are accepted to become the new resident genotype; 2) no spurious  
478 signal, i.e. selection to express the effector under a constant “ON” signal and not under a  
479 constant “OFF” signal; 3) harmless spurious signal, i.e. selection to express the effector under a  
480 constant “ON” environment whereas effector expression in the “OFF” environment with short  
481 spurious signals is neither punished nor rewarded beyond the cost of unnecessary gene  
482 expression. AND-gated C1-FFLs evolve much less often under all three negative control  
483 conditions (**Fig. 6**), showing that their prevalence is a consequence of selection for filtering out  
484 short spurious signals, rather than a consequence of mutational bias and/or simpler forms of  
485 selection. C1-FFLs that do evolve under control conditions tend not to be AND-gated (**Fig. 6A**),  
486 and mostly disappear when weak TFBSs are excluded during motif scoring (**Fig. 6B**).

487

#### 488 **Diamond motifs are an alternative adaptation in more complex networks**

489

490 In real biological situations, sometimes the source signal will not be able to directly regulate an  
491 effector, and must instead operate via a longer regulatory pathway involving intermediate TFs<sup>46</sup>.  
492 In this case, even if the signal itself takes the idealized form shown in **Fig. 3**, its shape after  
493 propagation may become distorted by the intrinsic processes of transcription. Motifs are under  
494 selection to handle this distortion.

495

496 To enforce indirect regulation, we ran simulations in which the signal was only allowed to bind  
497 to the cis-regulatory sequences of TFs and not of effector genes. The fitness distribution of the  
498 evolutionary replicates has no obvious gaps (**Fig. S5**), so we compared the highest fitness, lowest  
499 fitness, and median fitness replicates. In agreement with results when direct regulation is

500 allowed, genotypes of low and medium fitness contain few AND-gated C1-FFLs, while high  
501 fitness genotypes contain many more (**Fig. 7B, left and right**).

502

503 While visually examining the network context of these C1-FFLs, we discovered that many were  
504 embedded within AND-gated “diamonds”. In a diamond, the signal activates the expression of  
505 two genes that encode different TFs, and the two TFs activate the expression of an effector gene  
506 (**Fig. 7A middle**). When one of the two TF genes activates the other, then a C1-FFL is also  
507 present among the same set of genes; we call this topology a “FFL-in-diamond” (**Fig. 7A right**),  
508 and the prevalence of this configuration drew our attention toward diamonds. This led us to  
509 discover that AND-gated diamonds also occurred frequently without AND-gated C1-FFLs, in the  
510 configuration we call “isolated diamonds” (**Fig. 7A middle**). Note that it is in theory possible, but  
511 in practice uncommon, for diamonds to be part of more complex conjugates. Systematically  
512 scoring the AND-gated isolated diamond motif confirmed its high occurrence (**Fig. 7B and C,**  
513 **middle**).

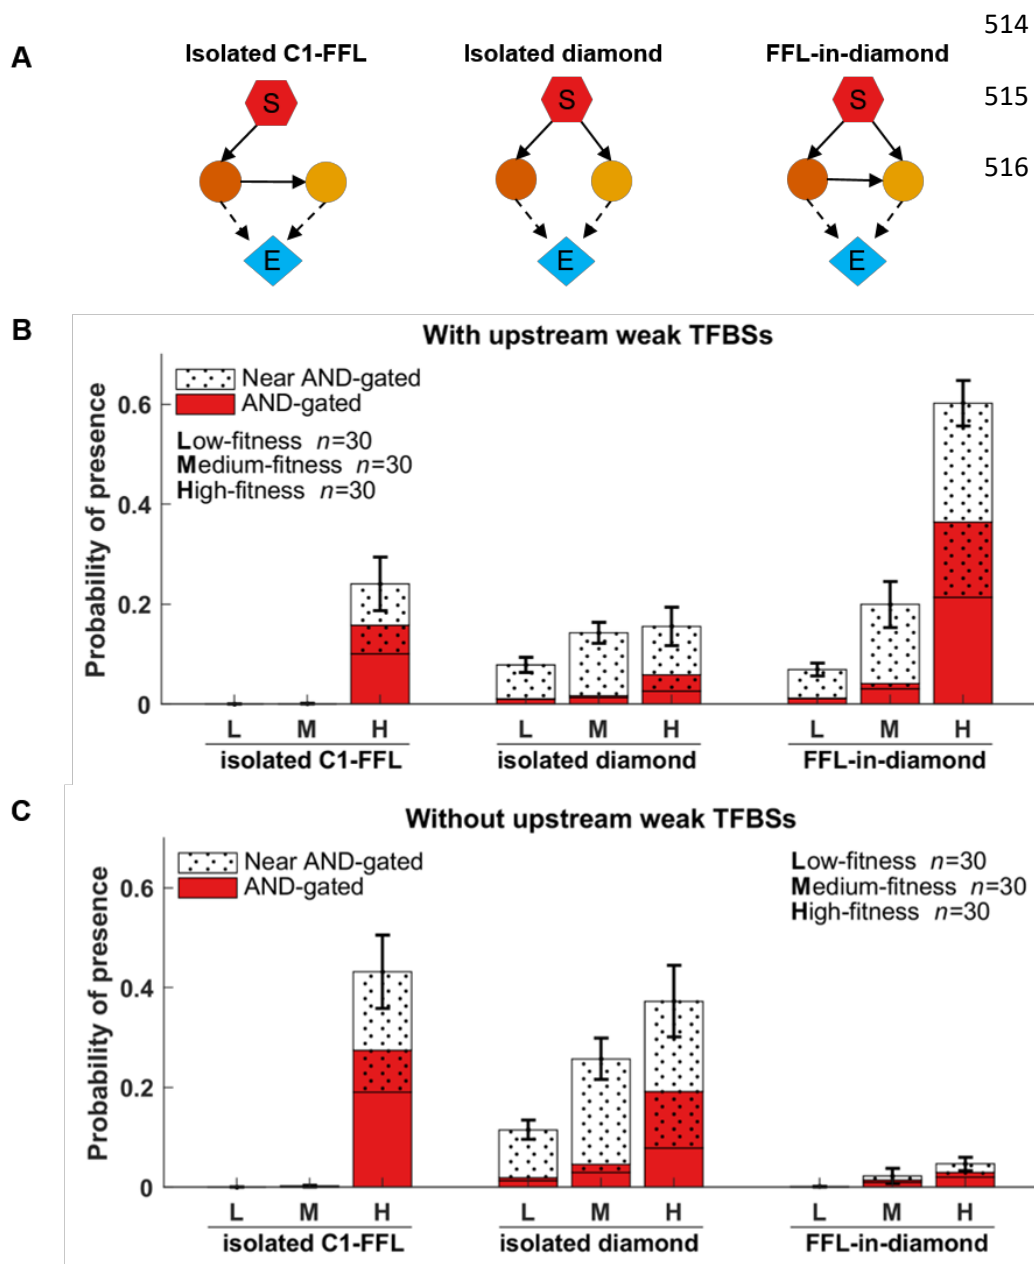

517 **Figure 7. Both AND-gated C1-FFLs and AND-gated diamonds (A) are associated with high**  
 518 **fitness in complex networks under selection to filter out short spurious signals.** Out of 160  
 519 simulations (**Fig. S5**), we took the 30 with the highest fitness (H), the 30 with the lowest fitness  
 520 (L), and 30 of around median fitness (M). AND-gated motifs are scored while including weak  
 521 TFBSs in the effectors' cis-regulatory regions, near-AND-gated motifs are those scored only  
 522 when these weak TFBSs are excluded. It is possible for the same genotype to contain one of  
 523 each, resulting in overlap between the red AND-gated columns and the dotted near-AND-gated  
 524 columns. Weak TFBSs upstream in the TRN, i.e. not in the effector, are shown both included (**B**)  
 525 and excluded (**C**). See Supplementary Text Section 11 for y-axis calculation details. Error bars  
 526 show mean $\pm$ SE of the proportion of evolutionary steps containing the motif in question, across  
 527 replicate evolutionary simulations.

528 An AND-gated C1-FFL integrates information from a short/fast regulatory pathway with  
529 information from a long/slow pathway, in order to filter out short spurious signals. A diamond  
530 achieves the same end of integrating fast and slowly transmitted information via differences in  
531 the gene expression dynamics of the two regulatory pathways, rather than via topological length  
532 (**Fig. 8**). The fast and slow pathways could be distinguished in a number of ways, e.g. by the  
533 slope at which the transcription factor concentration increases or the time at which it exceeds a  
534 threshold or plateaus. We found it convenient to identify the “fast TF” as the one with the  
535 higher protein degradation rate. Specifically, we use the geometric mean of the protein  
536 degradation rate over gene copies of a TF in order to differentiate the two TFs. The parameter  
537 values of the fast TF are more evolutionarily constrained than those of the slow TF (**Table S5**). In  
538 particular, there is selection for rapid degradation of the fast TF protein and mRNA (**Table S5**).  
539 Isolated AND-gated C1-FFLs also show pronounced selection for the TF in the fast pathway to  
540 have rapid protein degradation (**Table S6**).

541

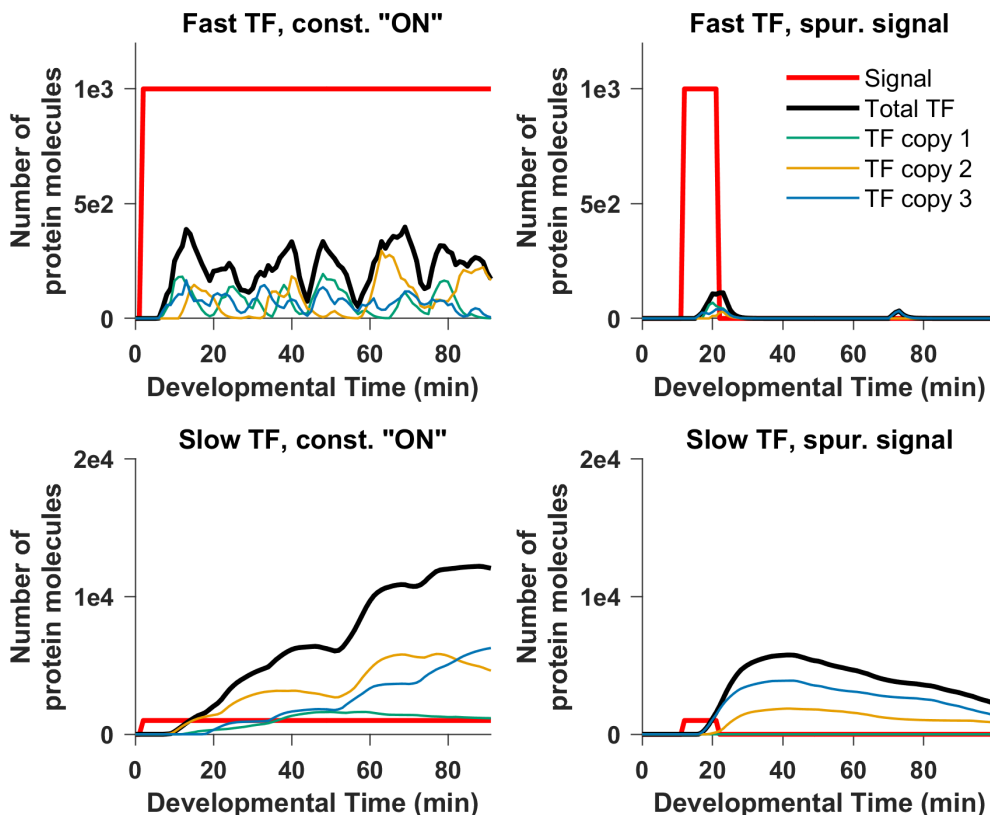

542

543 **Figure 8. The two intermediate TFs in an AND-gated “diamond” motif have different**  
544 **expression dynamics and propagate the signal at different speeds.** Expression of the two TFs in  
545 one representative genotype from the one high-fitness evolutionary replicate in **Fig. 7B** that  
546 evolved an AND-gated isolated diamond is shown. Each TF is a different protein, and each is  
547 encoded by 3 gene copies, shown separately in color, with the total in thick black. The  
548 expression of one TF plateaus faster than that of the other; this is characteristic of the AND-  
549 gated diamond motif, and leads to the same functionality as the AND-gated C1-FLL.

550

551 But mutational biases make it difficult to evolve very fast-degrading mRNA and protein. And  
552 even when they do evolve, fast degradation keeps the fast TF at low concentrations. To  
553 compensate, the fast TF must overcome mutational bias to also evolve high binding affinity and  
554 rapid protein synthesis (**Table S5, Table S6**).

555

556 Note that a simple transcriptional cascade, signal → TF → effector, has also been found  
557 experimentally to filter out short spurious signals when the intermediate TF is rapidly degraded,  
558 dampening the effect of a brief signal<sup>47</sup>. Two such transcriptional cascades involving different  
559 intermediate TFs form a diamond, so the utility of a single cascade is a potential explanation for  
560 the high prevalence of double-cascade diamonds. However, in this case we would have no  
561 reason to expect marked differences in expression dynamics between the two TFs, as illustrated  
562 in **Fig. 8** and **Table S5**. Enrichment for AND-gates (**Fig. 7**) indicates selection to integrate  
563 information from the two cascades. On the other hand, we do find some non-AND-gated  
564 diamonds, and these might best be considered as cascades. Inspection of their parameter values  
565 reveals that in these diamonds, both TFs have fast-degrading mRNAs and proteins so that both  
566 TFs shut down rapidly once signal is turned off. This makes such diamonds less vulnerable to  
567 spurious signals, reducing the need for the AND gate. The difficulty of evolving not just one but  
568 two fast-degrading high-affinity TFs likely explains why non-AND-gated diamonds are rare. As  
569 we will see in the next section, these non-AND-gated diamonds are nevertheless scored as AND-  
570 gated when weak TFBSs are excluded.

571

572 **Weak TFBSs can change how adaptive motifs are scored even when they do not change**  
573 **function**

574

575 Results depend on whether we include weak TFBSs when scoring motifs. Weak TFBSs can either  
576 be in the effector's cis-regulatory region, affecting how the regulatory logic is scored, or in TFs  
577 upstream in the TRN, affecting only the presence or absence of motifs. When a motif is scored  
578 as AND-gated only when two-mismatch TFBSs in the effector are excluded, we call it a “near-

579 AND-gated” motif. Recall from **Fig. 2** that effector expression requires two TFs to be bound, with  
580 only one TFBS of each type creating an AND-gate. When a second, two-mismatch TFBS of the  
581 same type is present, we have a near-AND-gate. TFs may bind so rarely to this weak affinity TFBS  
582 that its presence changes little, making the regulatory logic still effectively AND-gated. A near-  
583 AND-gated motif may therefore evolve for the same adaptive reasons as an AND-gated one. **Fig.**  
584 **7B** and **C** shows that both AND-gated and near-AND-gated motifs are enriched in the higher  
585 fitness genotypes.

586

587 When we exclude upstream weak TFBSs while scoring motifs, FFL-in-diamonds are no longer  
588 found, while the occurrence of isolated C1-FFLs and diamonds increases (**Fig. 7C**). This makes  
589 sense, because adding one weak TFBS, which can easily happen by chance alone, can convert an  
590 isolated diamond or C1-FFL into a FFL-in-diamond (added between intermediate TFs, or from  
591 signal to slow TF, respectively).

592

593 AND-gated isolated C1-FFLs appear mainly in the highest fitness outcomes, while AND-gated  
594 isolated diamonds appear in all fitness groups (**Fig. 7C**), suggesting that diamonds are easier to  
595 evolve. 25 out of 30 high-fitness evolutionary replicates are scored as having a putatively  
596 adaptive AND-gated or near-AND-gated motif in at least 50% of their evolutionary steps when  
597 upstream weak TFBSs are ignored (close to addition of bars in **Fig. 7C**, because these two AND-  
598 gated motifs rarely coexist in a high-fitness genotype).

599

600 Just as for the AND-gated C1-FFLs evolved under direct regulation and analyzed in **Fig. 5**,  
601 perturbation analysis supports an adaptive function for AND-gated C1-FFLs and diamonds  
602 evolved under indirect regulation (**Fig. 9A.i, 9B.i**). Breaking the AND-gate logic of these motifs by

603 adding a (strong) TFBS to the effector cis-regulatory region reduces the fitness under the  
604 spurious signal but increases it under the constant “ON” beneficial signal, resulting in a net  
605 decrease in the overall fitness.  
606  
607 If we add a weak (two-mismatch) TFBS instead, this converts an AND-gated motif to a near-AND-  
608 gated motif. This lowers fitness only when the extra link is from the slow TF to the effector, and  
609 not when the extra link is from the fast TF to the effector (**Fig. 9A.ii, 9B.ii**).



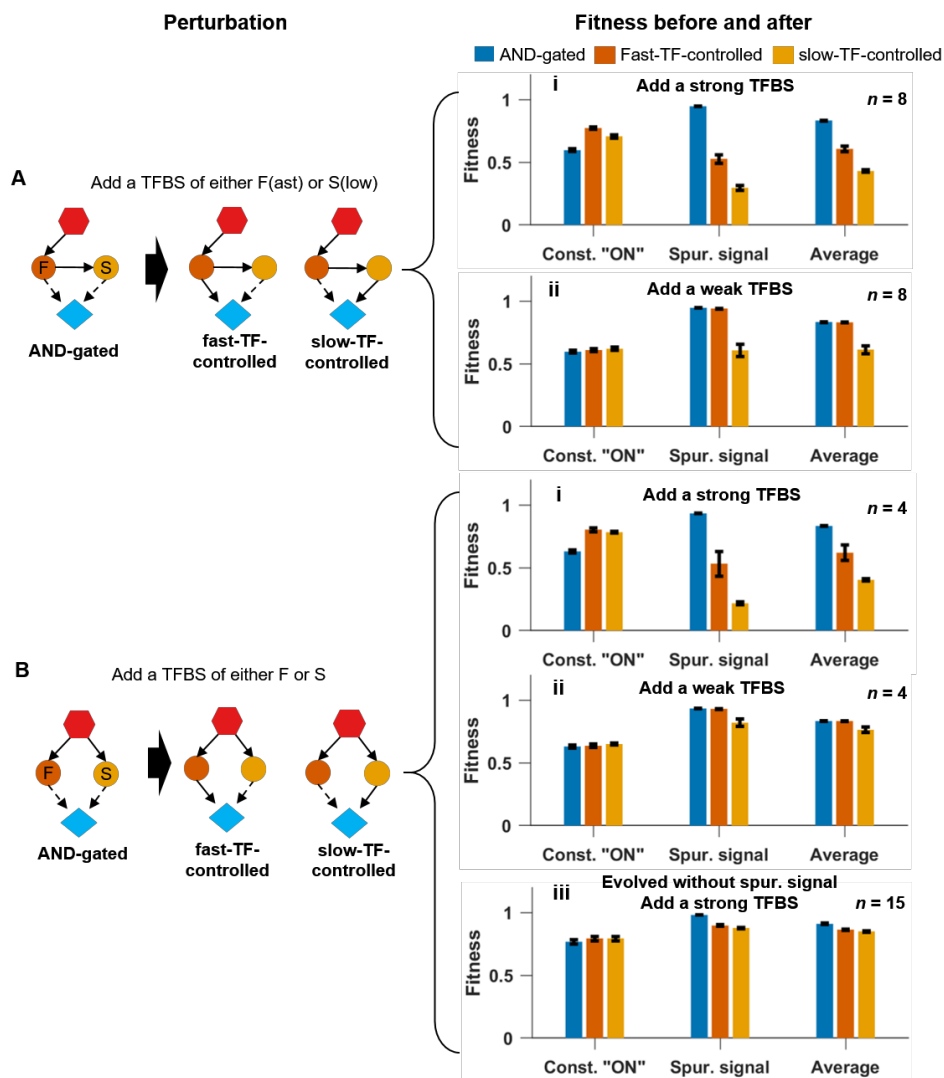

610 **Figure 9. Perturbation analysis shows that AND-gated C1-FFLs (A) and diamonds (B) filter out**  
 611 **short spurious signals.** We add a strong TFBS (i) or a two-mismatch TFBS (ii) or (iii); the latter  
 612 creates near-AND-gated motifs. Allowing the effector to respond to the slow TF alone slightly  
 613 increases the ability to respond to the signal, but leads to a larger loss of fitness when effector  
 614 expression is undesirable. Allowing the effector to respond to the fast TF alone does so only  
 615 when the conversion uses a strong TFBS not a two-mismatch TFBS. **(A)** We perform the  
 616 perturbation on 8 of the 18 high-fitness replicates from **Fig.7B** that evolved an AND-gated C1-  
 617 FFL. **(B) (i)** and **(ii)** are based on 4 of the 26 high-fitness replicates that evolved an AND-gated  
 618 diamond in **Fig. 7B**, **(iii)** is based on 15 of the 37 replicates that evolved an AND-gated diamond  
 619 in response to selection for signal recognition in the absence of an external spurious signal (**Fig.**  
 620 **10B**). Replicate exclusion was based on the co-occurrence of other motifs with the potential to  
 621 confound results (see Supplementary Text Section 12 for details). Fitness is shown as mean±SE  
 622 of over replicate evolutionary simulations, calculated as described for **Fig. 5**.

623 Indeed, these extra links are tolerated during evolution too. If we take the 16 high-fitness  
624 replicates that contain a near-AND-gated C1-FFL in at least 1% of the evolutionary steps, then  
625 for 15 replicates of the 16, at least 88% of the near-AND-gated C1-FFLs in each of the 15  
626 replicates are only near-AND-gated because of extra weak TFBSs for the fast TF. In the remaining  
627 1 replicate, 93% of the near-AND-gated C1-FFLs have extra weak TFBSs specific for each of the  
628 TFs (and are therefore scored as OR-gated). In this last replicate, the two TFs in these OR-gated  
629 C1-FFLs have high and similar protein degradation rates, reducing the need for an AND gate for  
630 reasons discussed earlier. We similarly examine high-fitness replicates that, when upstream  
631 weak TFBSs are excluded, contain a near-AND-gated diamond in at least 1% of the evolutionary  
632 steps. In 15 of these 24 evolutionary replicates, the near-AND regulatory logic is in most  
633 evolutionary steps due to an extra weak TFBS of the fast TF, in 8 replicates (all of them OR-  
634 gated, like the OR-gated C1-FFL already discussed) it is due to weak TFBSs for each of the TFs,  
635 and in only 1 replicate is it due to an extra TFBS for the slow TF. For the latter two categories,  
636 both TFs in near-AND-gated diamonds have high and similar protein degradation rates. By  
637 chance alone, fast and slow TF should be equally likely to contribute the weak TFBS that makes a  
638 motif near-AND-gated rather than AND-gated. This expected 50:50 ratio can be rejected from  
639 our observed 15:0 and 15:1 ratios with  $p = 3 \times 10^{-5}$  and  $p = 3 \times 10^{-4}$ , respectively  
640 (cumulative binomial distribution, one-sided test). This non-random occurrence of weak TFBSs  
641 creating near-AND-gates illustrates how even weak TFBSs can be shaped by selection against  
642 some (but not all) motif-breaking links.

643

644 **AND-gated isolated diamonds also evolve in the absence of external spurious signals**

645

646 We simulated evolution under the same three control conditions as before, this time without  
647 allowing the signal to directly regulate the effector. In the “no spurious signal” and “harmless  
648 spurious signal” control conditions, motif frequencies are similar between low and high fitness  
649 genotypes (**Fig. S6, Fig. S7**), and so our analysis includes all evolutionary replicates. When weak  
650 (two-mismatch) TFBSs are excluded, AND-gated isolated C1-FFLs are seen only after selection  
651 for filtering out a spurious signal, and not under other selection conditions (**Fig. 10A**). However,  
652 AND-gated isolated diamonds also evolve in the absence of spurious signals, indeed at even  
653 higher frequency (**Fig. 10B**). Results including weak TFBSs are similar (**Fig. S8**).

654

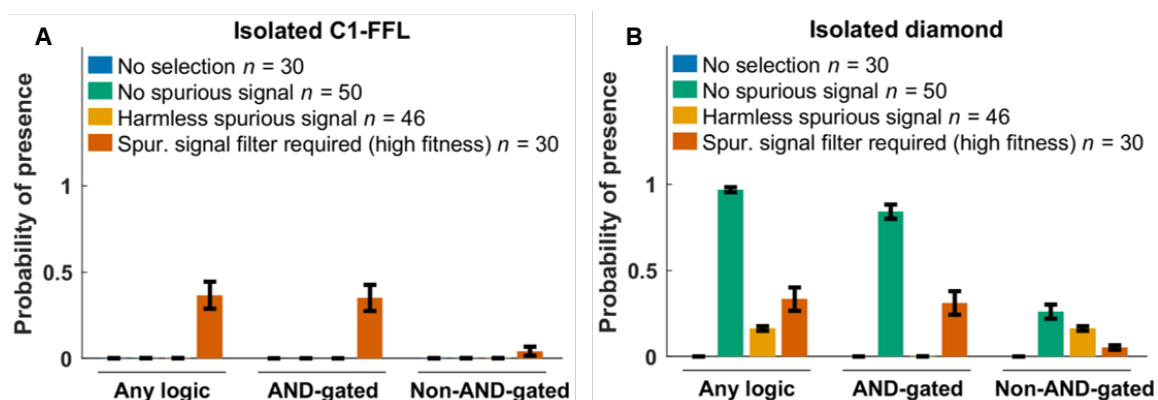

655 **Figure 10. Selection for filtering out a short spurious signal is the primary way to evolve AND-**  
656 **gated isolated C1-FFLs (A), but AND-gated isolated diamonds also evolve in the absence of**  
657 **spurious signals (B).** The selection conditions are the same as in **Fig. 6**, but we do not allow the  
658 signal to directly regulate the effector. When scoring motifs, we exclude all two-mismatch  
659 TFBSs; more comprehensive results are shown in **Fig. S8**. Many non-AND-gated diamonds have  
660 the “no regulation” logic in **Fig. 2**, perhaps as an artifact created by the duplication and  
661 divergence of intermediate TFs; we excluded them from the “Any logic” and “Non-AND-gated”  
662 tallies in (B). See Supplementary Text Section 11 for the calculation of y-axis. Data are shown as  
663 mean±SE over evolutionary replicates. We reused data from **Fig. 7** for “Spurious signal filter  
664 required (high fitness)”.

665 Perturbing the AND-gate logic in these isolated diamonds reduces fitness via effects in the  
666 environment where expressing the effector is deleterious (**Fig. 9B.iii**). Even in the absence of  
667 external short spurious signals, the stochastic expression of intermediate TFs might effectively  
668 create short spurious signals when the external signal is set to “OFF”. It seems that AND-gated  
669 diamonds evolve to mitigate this risk, but that AND-gated C1-FFLs do not. The duration of  
670 internally generated spurious signals has an exponential distribution, which means that the  
671 optimal filter would be one that does not delay gene expression<sup>48</sup>. The two TFs in an AND-gated  
672 diamond can be activated simultaneously, but they must be activated sequentially in an AND-  
673 gated C1-FFL; the shorter delays possible with AND-gated diamonds might explain why only  
674 diamonds and not FFLs evolve to filter out intrinsic noise in gene expression.

675

## 676 **Discussion**

677

### 678 **Adaptive nature of AND-gated C1-FFLs**

679

680 There has never been sufficient evidence to satisfy evolutionary biologists that motifs in TRNs  
681 represent adaptations for particular functions. Critiques by evolutionary biologists to this  
682 effect<sup>13-23</sup> have been neglected, rather than answered, until now. While C1-FFLs can be  
683 conserved across different species<sup>49-52</sup>, this does not imply that specific “just-so” stories about  
684 their function are correct. In this work, we study the evolution of AND-gated C1-FFLs, which are  
685 hypothesized to be adaptations for filtering out short spurious signals<sup>3</sup>. Using a novel and more  
686 mechanistic computational model to simulate TRN evolution, we found that AND-gated C1-FFLs  
687 evolve readily under selection for filtering out a short spurious signal, and not under control  
688 conditions. Our results support the adaptive hypothesis about C1-FFLs.

689

690 AND-gated C1-FFLs express an effector after a noise-filtering delay when the signal is turned on,  
691 but shut down expression immediately when the signal is turned off, giving rise to a “sign-  
692 sensitive delay”<sup>3,7</sup>. Rapidly switching off has been hypothesized to be part of their selective  
693 advantage, above and beyond the function of filtering out short spurious signals<sup>48</sup>. We intended  
694 to select only for filtering out a short spurious signal, and not for fast turn-off; specifically, we  
695 expected effector expression to evolve a delay equal to the duration of the spurious signal.  
696 However, evolved solutions still expressed the effector in the presence of short spurious signals  
697 (**Fig. S2**), and thus benefitted from rapidly turning off this spurious expression. In other words,  
698 we effectively selected for both delayed turn-on and rapid turn-off, despite our intent to only  
699 select for the former.

700

701 It is difficult to distinguish adaptations from “spandrels”<sup>8</sup>. Standard procedure is to look for  
702 motifs that are more frequent than expected from some randomized version of a TRN<sup>2,53</sup>. For  
703 this method to work, this randomization must control for all confounding factors that are non-  
704 adaptive with respect to the function in question, from patterns of mutation to a general  
705 tendency to hierarchy – a near-impossible task. Our approach to a null model is not to  
706 randomize, but to evolve with and without selection for the specific function of interest. This  
707 meets the standards of evolutionary biology for inferring the adaptive nature of a motif<sup>13-23</sup>.

708

#### 709 **Technical lessons learned**

710

711 Previous studies have also attempted to evolve adaptive motifs in a computational TRN,  
712 successfully under selection for circadian rhythm and for multiple steady states<sup>54</sup>, and

713 unsuccessfully under selection to produce a sine wave in response to a periodic pulse<sup>23</sup>. Other  
714 studies have evolved adaptive motifs in a mixed network of transcriptional regulation and  
715 protein-protein interaction<sup>55-57</sup>. Our successful simulation might offer some methodological  
716 lessons, especially a focus on high-fitness evolutionary replicates, which was done by us and by  
717 Burda et al.<sup>54</sup> but not by Knabe et al.<sup>23</sup>.

718

719 Knabe et al.<sup>23</sup> suggested that including a cost for gene expression may suppress unnecessary  
720 links and thus make it easier to score motifs. However, when we removed the cost of gene  
721 expression term ( $C(t) = 0$  in Supplementary Section 8), AND-gated C1-FFLs still evolved in the  
722 high-fitness genotypes under selection for filtering out a spurious signal (**Fig. S9**). In our model,  
723 removing the cost of gene expression did not, via permitting unnecessary links, conceal motifs.

724

725 While simplified relative to reality, our model is undeniably complicated. An important question  
726 is which complications are important for what. One complication is our nucleotide-sequence-  
727 level model of cis-regulatory sequences. This has the advantage of capturing weak TFBSs,  
728 realistic turnover, and other mutational biases. The disadvantage is that calculating the  
729 probabilities of TF binding is computationally expensive and scales badly with network size.  
730 Future work might design a more schematic model of cis-regulatory sequences to improve  
731 computation while still capturing realistic mutation biases. A second complication of our  
732 approach is the stochastic simulation of gene expression. This is essential for our question,  
733 because intrinsic noise in gene expression can mimic the effects of a spurious signal, but may be  
734 less important in other scenarios, e.g. where the focus is on steady state behavior.

735

736 **The ubiquity of weak TFBSs complicates motif scoring**

737

738 Our model, while complex for a model and hence capable of capturing intrinsic noise, is  
739 inevitably less complex than the biological reality. However, we hope to have captured key  
740 phenomena, albeit in simplified form. One key phenomenon is that TFBSs are not simply present  
741 vs. absent but can be strong or weak, i.e. the TRN is not just a directed graph, but its  
742 connections vary in strength. Our model, like that of Burda et al.<sup>54</sup> in the context of circadian  
743 rhythms, captures this fact by basing TF binding affinity on the number of mismatch deviations  
744 from a consensus TFBS sequence. While in reality, the strength of TF binding is determined by  
745 additional factors, such as broader nucleic context and cooperative behavior between TFs  
746 (reviewed in Inukai et al.<sup>58</sup>), these complications are unlikely to change the basic dynamics of  
747 frequent appearance of weak TFBSs and greater mutational accessibility of strong TFBSs from  
748 weak TFBSs than de novo. Similarly, AND-gating can be quantitative rather than qualitative<sup>59</sup>, a  
749 phenomenon that weak TFBSs in our model provide a simplified version of.

750

751 Core links in adaptive motifs almost always involve strong not weak TFBSs. However, weak (two-  
752 mismatch) TFBSs can create additional links that prevent an adaptive motif from being scored as  
753 such. Some potential additional links are neutral while others are deleterious; the observed links  
754 are thus shaped by this selective filter, without being adaptive. Note that there have been  
755 experimental reports that even weak TFBSs can be functionally important<sup>60, 61</sup>; these might,  
756 however, better correspond to 1-mismatch TFBSs in our model than two-mismatch TFBSs.  
757 Ramos et al.<sup>61</sup> and Crocker et al.<sup>60</sup> identified their “weak” TFBSs in comparison to the strongest  
758 possible TFBS, not in comparison to the weakest still showing affinity above baseline.

759

760 **Different solutions for filtering out short spurious signals**

761

762 A striking and unexpected finding of our study was that AND-gated diamonds evolved as an  
763 alternative motif for filtering out short spurious external signals, and that these, unlike FFLs,  
764 were also effective at filtering out intrinsic noise. Multiple motifs have previously been found  
765 capable of generating the same steady state expression pattern<sup>21</sup>; here we find multiple motifs  
766 for a much more complex function.

767

768 Diamonds are not overrepresented in the TRNs of bacteria<sup>2</sup> or yeast<sup>62</sup>, but are overrepresented  
769 in signaling networks (in which post-translational modification plays a larger role)<sup>63</sup>, and in  
770 neuronal networks<sup>1</sup>. In our model, we treated the external signal as though it were a  
771 transcription factor, simply as a matter of modeling convenience. In reality, signals external to a  
772 TRN are by definition not TFs (although they might be modifiers of TFs). This means that our  
773 indirect regulation case, in which the signal is not allowed to directly turn on the effector, is the  
774 most appropriate one to analyze if our interest is in TRN motifs that mediate contact between  
775 the two. Note that if under indirect regulation we were to score the signal as not itself a TF, we  
776 would observe adaptive C1-FFLs but not diamonds, in agreement with the TRN data. However,  
777 this TRN data might miss functional diamond motifs that spanned levels of regulatory  
778 organization, i.e. that included both transcriptional and other forms of regulation. The greatest  
779 chance of finding diamonds within TRNs alone come from complex and multi-layered  
780 developmental cascades, rather than bacterial or yeast<sup>64</sup>. Multiple interwoven diamonds are  
781 hypothesized to be embedded with multi-layer perceptrons that are adaptations for complex  
782 computation in signaling networks<sup>65</sup>.

783



784 Previous work has also identified alternatives to AND-gated C1-FFLs. Specifically, in mixed  
785 networks of transcriptional regulation and protein-protein interactions, FFLs did not evolve  
786 under selection for delayed turn-on (as well as rapid turn-off)<sup>57</sup>. Indeed, even when a FFL  
787 topology was enforced, with only the parameters allowed to evolve, two alternative motifs  
788 remained superior<sup>57</sup>. However, one alternative motif, which the authors called “positive  
789 feedback” is essentially still an AND-gated C1-FFL, specifically one in which the intermediate TF  
790 expression is also AND-gated, requiring both itself and the signal for upregulation. The other is a  
791 cascade in which the signal inhibits the expression of an intermediate TF protein that represses  
792 the expression of the effector. The cost of constitutive expression of the intermediate TF in the  
793 absence of the signal was not modeled<sup>57</sup>, giving this cascade an unrealistic advantage.

794

#### 795 **The importance of dynamics and intrinsic noise**

796

797 Most previous research on C1-FFLs has used an idealized implementation (e.g. a square wave) of  
798 what a short spurious signal entails<sup>4, 48, 66</sup>. In real networks, noise arises intrinsically in a greater  
799 diversity of forms, which our model does more to capture. Even when a “clean” form of noise  
800 enters a TRN, it subsequently gets distorted with the addition of intrinsic noise<sup>67</sup>. Intrinsic noise  
801 is ubiquitous and dealing with it is an omnipresent challenge for selection. Indeed, we see  
802 adaptive diamonds evolve to suppress intrinsic noise, even when we select in the absence of  
803 extrinsic spurious signals.

804

805 The function of a motif relies ultimately on its dynamic behavior, with topology merely a means  
806 to that end. To create two pathways that regulate the effector in different speeds, the C1-FFL  
807 motif uses a pair of short and long pathways, but these also correspond to fast-degrading and

808 slow-degrading TFs. This same function was achieved entirely non-topologically in our  
809 adaptively evolved diamond motifs. This agrees with other studies showing that topology alone  
810 is not enough to infer activities such as spurious signal filtering from network motifs<sup>68-70</sup>.

811

## 812 **Acknowledgements**

813 Work was supported by the University of Arizona and by a Pew Scholarship to JM, John  
814 Templeton Foundation grant 39667 to JM, and by National Institutes of Health grants  
815 R35GM118170 to MLS and R01GM076041 to JM. We thank Hinrich Boeger for helpful  
816 discussions and careful reading of the manuscript, Jasmin Uribe for early work on this project,  
817 and the high-performance computing center at the University of Arizona for generous  
818 allocations.

819

## 820 **Author Contributions**

821 K.X. and J.M. designed the simulations, analyzed the results, and wrote the manuscript. K.X.  
822 performed the simulations and statistical analyses. K.X., A.L., and J.M. wrote the simulation  
823 code. M.L.S. and J.M. conceptualized the initial design of the simulations.

824

825 **Competing Interests:** The authors declare no conflicts of interest.

## References

1. Milo R, Shen-Orr S, Itzkovitz S, Kashtan N, Chklovskii D, Alon U. Network motifs: Simple building blocks of complex networks. *Science* **298**, 824-827 (2002).
2. Shen-Orr SS, Milo R, Mangan S, Alon U. Network motifs in the transcriptional regulation network of *Escherichia coli*. *Nature Genet* **31**, 64-68 (2002).
3. Alon U. Network motifs: theory and experimental approaches. *Nat Rev Genet* **8**, 450-461 (2007).
4. Mangan S, Alon U. Structure and function of the feed-forward loop network motif. *Proc Natl Acad Sci USA* **100**, 11980-11985 (2003).
5. Jaeger KE, Pullen N, Lamzin S, Morris RJ, Wigge PA. Interlocking feedback loops govern the dynamic behavior of the floral transition in Arabidopsis. *The Plant Cell* **25**, 820-833 (2013).
6. Peter IS, Davidson EH. Assessing regulatory information in developmental gene regulatory networks. *Proc Natl Acad Sci USA* **114**, 5862-5869 (2017).
7. Mangan S, Zaslaver A, Alon U. The coherent feedforward loop serves as a sign-sensitive delay element in transcription networks. *J Mol Biol* **334**, 197-204 (2003).
8. Gould SJ, Lewontin RC. The Spandrels of San Marco and the Panglossian Paradigm: A Critique of the Adaptationist Programme. *Proc R Soc Lond, B, Biol Sci* **205**, 581-598 (1979).
9. Graur D, Zheng Y, Price N, Azevedo RBR, Zufall RA, Elhaik E. On the Immortality of Television Sets: "Function" in the Human Genome According to the Evolution-Free Gospel of ENCODE. *Genome Biol Evol* **5**, 578-590 (2013).
10. Masel J, Promislow DEL. Answering evolutionary questions: A guide for mechanistic biologists. *BioEssays* **38**, 704-711 (2016).
11. Widder S, Solé R, Macía J. Evolvability of feed-forward loop architecture biases its abundance in transcription networks. *BMC Syst Biol* **6**, 7 (2012).

12. Cordero OX, Hogeweg P. Feed-forward loop circuits as a side effect of genome evolution. *Mol Biol Evol* **23**, 1931-1936 (2006).
13. Artzy-Randrup Y, Fleishman SJ, Ben-Tal N, Stone L. Comment on "Network Motifs: Simple Building Blocks of Complex Networks" and "Superfamilies of Evolved and Designed Networks". *Science* **305**, 1107 (2004).
14. Jenkins D, Stekel D. De Novo Evolution of Complex, Global and Hierarchical Gene Regulatory Mechanisms. *J Mol Evol* **71**, 128-140 (2010).
15. Lynch M. The evolution of genetic networks by non-adaptive processes. *Nat Rev Genet* **8**, 803-813 (2007).
16. Mazurie A, Bottani S, Vergassola M. An evolutionary and functional assessment of regulatory network motifs. *Genome Biol* **6**, R35 (2005).
17. Solé RV, Valverde S. Are network motifs the spandrels of cellular complexity? *Trends Ecol Evol* **21**, 419-422 (2006).
18. Tsuda ME, Kawata M. Evolution of Gene Regulatory Networks by Fluctuating Selection and Intrinsic Constraints. *PLoS Comput Biol* **6**, e1000873 (2010).
19. Wagner A. Does Selection Mold Molecular Networks? *Sci STKE* **2003**, pe41 (2003).
20. Kuo PD, Banzhaf W, Leier A. Network topology and the evolution of dynamics in an artificial genetic regulatory network model created by whole genome duplication and divergence. *BioSystems* **85**, 177-200 (2006).
21. Payne JL, Wagner A. Function does not follow form in gene regulatory circuits. *Scientific Reports* **5**, 13015 (2015).
22. Ruths T, Nakhleh L. Neutral forces acting on intragenomic variability shape the *Escherichia coli* regulatory network topology. *Proc Natl Acad Sci USA* **110**, 7754-7759 (2013).
23. Knabe JF, Nehaniv CL, Schilstra MJ. Do motifs reflect evolved function?—No convergent evolution of genetic regulatory network subgraph topologies. *Biosystems* **94**, 68-74 (2008).
24. Raser JM, O'Shea EK. Noise in Gene Expression: Origins, Consequences, and Control. *Science* **309**, 2010-2013 (2005).

25. Kærn M, Elston TC, Blake WJ, Collins JJ. Stochasticity in gene expression: from theories to phenotypes. *Nat Rev Genet* **6**, 451-464 (2005).
26. Eldar A, Elowitz MB. Functional roles for noise in genetic circuits. *Nature* **467**, 167–173 (2010).
27. Draghi J, Whitlock M. Robustness to noise in gene expression evolves despite epistatic constraints in a model of gene networks. *Evolution* **69**, 2345-2358 (2015).
28. Jenkins DJ, Stekel DJ. A New Model for Investigating the Evolution of Transcription Control Networks. *Artificial Life* **15**, 259-291 (2009).
29. Henry A, Hemery M, François P.  $\phi$ -evo: A program to evolve phenotypic models of biological networks. *PLoS Comput Biol* **14**, e1006244 (2018).
30. Brown CR, Mao C, Falkovskaia E, Jurica MS, Boeger H. Linking Stochastic Fluctuations in Chromatin Structure and Gene Expression. *PLoS Biol* **11**, e1001621 (2013).
31. Mao C, *et al.* Quantitative analysis of the transcription control mechanism. *Mol Syst Biol* **6**, 431 (2010).
32. Shahbazian MD, Grunstein M. Functions of Site-Specific Histone Acetylation and Deacetylation. *Annu Rev Biochem* **76**, 75-100 (2007).
33. Voss TC, Hager GL. Dynamic regulation of transcriptional states by chromatin and transcription factors. *Nat Rev Genet* **15**, 69-81 (2013).
34. Katan-Khaykovich Y, Struhl K. Dynamics of global histone acetylation and deacetylation in vivo: rapid restoration of normal histone acetylation status upon removal of activators and repressors. *Genes Dev* **16**, 743-752 (2002).
35. Courey AJ, Jia S. Transcriptional repression: the long and the short of it. *Genes Dev* **15**, 2786-2796 (2001).
36. Poss ZC, Ebmeier CC, Taatjes DJ. The Mediator complex and transcription regulation. *Crit Rev Biochem Mol Biol* **48**, 575-608 (2013).
37. Decker KB, Hinton DM. Transcription Regulation at the Core: Similarities Among Bacterial, Archaeal, and Eukaryotic RNA Polymerases. *Annu Rev Microbiol* **67**, 113-139 (2013).

38. Roy AL, Singer DS. Core promoters in transcription: old problem, new insights. *Trends Biochem Sci* **40**, 165-171 (2015).
39. van Drogen F, Stucke VM, Jorritsma G, Peter M. MAP kinase dynamics in response to pheromones in budding yeast. *Nat Cell Biol* **3**, 1051 (2001).
40. Gillespie DT. Exact stochastic simulation of coupled chemical reactions. *J Phys Chem* **81**, 2340-2361 (1977).
41. Ghaemmaghami S, *et al.* Global analysis of protein expression in yeast. *Nature* **425**, 737-741 (2003).
42. Kafri M, Metzler-Raz E, Jona G, Barkai N. The Cost of Protein Production. *Cell Reports* **14**, 22-31 (2016).
43. Gerrish PJ, Lenski RE. The fate of competing beneficial mutations in an asexual population. *Genetica* **102**, 127 (1998).
44. van Nimwegen E, Crutchfield JP, Huynen M. Neutral evolution of mutational robustness. *Proc Natl Acad Sci USA* **96**, 9716-9720 (1999).
45. Kimura M. On the probability of fixation of mutant genes in a population. *Genetics* **47**, 713-719 (1962).
46. Balázsi G, Barabási AL, Oltvai ZN. Topological units of environmental signal processing in the transcriptional regulatory network of *Escherichia coli*. *Proc Natl Acad Sci U S A* **102**, 7841-7846 (2005).
47. Hooshangi S, Thiberge S, Weiss R. Ultrasensitivity and noise propagation in a synthetic transcriptional cascade. *Proc Natl Acad Sci USA* **102**, 3581-3586 (2005).
48. Dekel E, Mangan S, Alon U. Environmental selection of the feed-forward loop circuit in gene-regulation networks. *Physical Biology* **2**, 81 (2005).
49. Boyle AP, *et al.* Comparative analysis of regulatory information and circuits across distant species. *Nature* **512**, 453-456 (2014).
50. Kemmeren P, *et al.* Large-Scale Genetic Perturbations Reveal Regulatory Networks and an Abundance of Gene-Specific Repressors. *Cell* **157**, 740-752 (2014).

51. Stergachis AB, *et al.* Conservation of trans-acting circuitry during mammalian regulatory evolution. *Nature* **515**, 365-370 (2014).
52. Madan Babu M, Teichmann SA, Aravind L. Evolutionary dynamics of prokaryotic transcriptional regulatory networks. *J Mol Biol* **358**, 614-633 (2006).
53. Kashtan N, Itzkovitz S, Milo R, Alon U. Efficient sampling algorithm for estimating subgraph concentrations and detecting network motifs. *Bioinformatics* **20**, 1746-1758 (2004).
54. Burda Z, Krzywicki A, Martin OC, Zagorski M. Motifs emerge from function in model gene regulatory networks. *Proc Natl Acad Sci USA* **108**, 17263-17268 (2011).
55. François P, Hakim V. Design of genetic networks with specified functions by evolution in silico. *Proc Natl Acad Sci USA* **101**, 580-585 (2004).
56. François P, Siggia ED. Predicting embryonic patterning using mutual entropy fitness and in silico evolution. *Development* **137**, 2385-2395 (2010).
57. Warmflash A, François P, Siggia ED. Pareto evolution of gene networks: An algorithm to optimize multiple fitness objectives. *Physical Biology* **9**, 56001-56007 (2012).
58. Inukai S, Kock KH, Bulyk ML. Transcription factor–DNA binding: beyond binding site motifs. *Curr Opin Genet Dev* **43**, 110-119 (2017).
59. Wang D, *et al.* Loregic: A Method to Characterize the Cooperative Logic of Regulatory Factors. *PLoS Comput Biol* **11**, e1004132 (2015).
60. Crocker J, *et al.* Low Affinity Binding Site Clusters Confer Hox Specificity and Regulatory Robustness. *Cell* **160**, 191-203 (2015).
61. Ramos AI, Barolo S. Low-affinity transcription factor binding sites shape morphogen responses and enhancer evolution. *Philos Trans R Soc Lond, B, Biol Sci* **368**, 20130018 (2013).
62. Lee TI, *et al.* Transcriptional regulatory networks in *Saccharomyces cerevisiae*. *Science* **298**, 799-804 (2002).
63. Ma'ayan A, *et al.* Formation of regulatory patterns during signal propagation in a mammalian cellular network. *Science* **309**, 1078-1083 (2005).

64. Rosenfeld N, Alon U. Response Delays and the Structure of Transcription Networks. *J Mol Biol* **329**, 645-654 (2003).
65. Alon U. *An Introduction to Systems Biology: Design Principles of Biological Circuits*. Chapman and Hall/CRC (2007).
66. Hayot F, Jayaprakash C. A feedforward loop motif in transcriptional regulation: induction and repression. *J Theor Biol* **234**, 133-143 (2005).
67. Pedraza JM, van Oudenaarden A. Noise Propagation in Gene Networks. *Science* **307**, 1965-1969 (2005).
68. Ingram PJ, Stumpf MP, Stark J. Network motifs: structure does not determine function. *BMC genomics* **7**, 108-108 (2006).
69. Wall ME. Structure–function relations are subtle in genetic regulatory networks. *Mathematical Biosciences* **231**, 61-68 (2011).
70. Wall ME, Dunlop MJ, Hlavacek WS. Multiple Functions of a Feed-Forward-Loop Gene Circuit. *J Mol Biol* **349**, 501-514 (2005).



# 1     **Supporting information for “Feed-forward** 2     **regulation adaptively evolves via dynamics** 3     **rather than topology when there is** 4     **intrinsic noise” by Xiong et al.**

5

## 6     **Table of contents**

|    |                                                                              |    |
|----|------------------------------------------------------------------------------|----|
| 7  | Supplementary Tables S1-S4                                                   | 2  |
| 8  | Supplementary Figures S1-S9                                                  | 6  |
| 9  | Supplementary Text Section 1: TF binding                                     | 17 |
| 10 | Supplementary Text Section 2: TF occupancy                                   | 19 |
| 11 | Supplementary Text Section 3: $r_{Act\_to\_Int}$                             | 21 |
| 12 | Supplementary Text Section 4: Transcription delay times                      | 22 |
| 13 | Supplementary Text Section 5: Translation delay times and $r_{protein\_syn}$ | 23 |
| 14 | Supplementary Text Section 6: mRNA and protein decay rates                   | 24 |
| 15 | Supplementary Text Section 7: Simulation of gene expression                  | 24 |
| 16 | Supplementary Text Section 8: Cost of gene expression                        | 29 |
| 17 | Supplementary Text Section 9: Mutation                                       | 30 |
| 18 | Supplementary Text Section 10: Burn-in evolutionary simulation conditions    | 34 |
| 19 | Supplementary Text Section 11: Quantifying occurrence of network motifs      | 35 |
| 20 | Supplementary Text Section 12: Perturbing network motifs                     | 36 |
| 21 | References                                                                   | 38 |

**Table S1. Major model parameters**

| Parameter                                                                          | Values <sup>[1]</sup>                                                                | Bounds <sup>[2]</sup>          | References                                                          |
|------------------------------------------------------------------------------------|--------------------------------------------------------------------------------------|--------------------------------|---------------------------------------------------------------------|
| Length of cis-regulatory sequence                                                  | 150 bp                                                                               |                                | (Yuan et al. 2005)                                                  |
| Length of TF recognition sequence                                                  | 8 bp                                                                                 |                                | (Wunderlich & Mirny 2009)                                           |
| Length occupied by a TF on each side of recognition sequence                       | 3 bp                                                                                 |                                | (Zhu & Zhang 1999)                                                  |
| Dissociation constant between TF and perfect TFBS, $K_d(0)$                        | <b><math>10^{U(-9,-6)}</math> mole/liter<sup>[3]</sup></b>                           | (0, $10^{-5}$ )                | (Park et al. 2004; Nalefski et al. 2006)                            |
| Dissociation constant between TF and non-specific DNA, $K_d(3)$                    | $10^{-5}$ M                                                                          |                                | (Maerkl & Quake 2007)                                               |
| Base rate of transition from Repressed to Intermediate                             | $0.15 \text{ min}^{-1}$                                                              |                                | (Katan-Khaykovich & Struhl 2002)                                    |
| Maximum transition rate from Repressed to Intermediate                             | $0.92 \text{ min}^{-1}$                                                              |                                | (Katan-Khaykovich & Struhl 2002; Brown et al. 2013)                 |
| Base rate of transition from Intermediate to Repressed                             | $0.67 \text{ min}^{-1}$                                                              |                                | (Katan-Khaykovich & Struhl 2002)                                    |
| Maximum transition rate from Intermediate to Repressed                             | $4.11 \text{ min}^{-1}$                                                              |                                | Chosen to give same dynamic range and Repressed to Intermediate     |
| Base rate of transition from Intermediate to Active                                | $0.025 \text{ min}^{-1}$                                                             |                                | (Brown et al. 2013)                                                 |
| Maximum transition rate from Intermediate to Active                                | $3.3 \text{ min}^{-1}$                                                               |                                | (Brown et al. 2013)                                                 |
| Transition rate from Active to Intermediate, $r_{Act\_to\_Int}$                    | <b><math>10^{N(1.27, 0.226)}</math> min<sup>-1</sup><sup>[4]</sup></b>               | [0.59, 64.7]                   | (Guillemette et al. 2005; Pelechano et al. 2010; Brown et al. 2013) |
| Length of gene, $L$                                                                | <b><math>10^{N(2.568, 0.34)}</math> codons</b>                                       | [50, 5000]                     | (SGD Project)                                                       |
| Rate of transcription initiation, $r_{max\_transc\_init}$                          | $6.75 \text{ min}^{-1}$                                                              |                                | (Brown et al. 2013)                                                 |
| Speed of transcription elongation                                                  | 600 codon/min                                                                        |                                | (Dujon 1996; Larson et al. 2011; Hocine et al. 2013)                |
| Time for transcribing UTRs and for terminating transcription                       | 1 min                                                                                |                                | (Dujon 1996; Larson et al. 2011; Hocine et al. 2013)                |
| Rate of mRNA degradation, $r_{mRNA\_deg}$                                          | <b><math>10^{M(-1.49, 0.267)}</math> min<sup>-1</sup></b>                            | [ $7.5 \times 10^{-4}$ , 0.54] | (Wang et al. 2002)                                                  |
| Speed of translation elongation                                                    | 330 codon/min                                                                        |                                | (Siwiak et al. 2010)                                                |
| Translation initiation time                                                        | 0.5 min                                                                              |                                | (Siwiak et al. 2010)                                                |
| Protein synthesis rate, $r_{protein\_syn}$                                         | <b><math>10^{M(0.322, 0.416)}</math> molecule mRNA<sup>-1</sup> min<sup>-1</sup></b> | [ $4.5 \times 10^{-3}$ , 61.4] | (Siwiak et al. 2010)                                                |
| Rate of protein degradation, $r_{protein\_deg}$                                    | <b><math>10^{M(-1.88, 0.561)}</math> min<sup>-1</sup></b>                            | [ $3.0 \times 10^{-6}$ , 0.69] | (Belle et al. 2006)                                                 |
| Saturation concentration of effector protein, $N_{e\_sat}$                         | 10,000 molecules/cell                                                                |                                | (Ghaemmaghani et al. 2003)                                          |
| Fitness cost of protein expression for a gene with $L = 10^{2.568}$ , $c_{transl}$ | $2 \times 10^{-6}$ (molecules/min) <sup>-1</sup>                                     |                                | (Ghaemmaghani et al. 2003; Kafri et al. 2016)                       |
| Maximum number of effector gene copies                                             | 5                                                                                    |                                |                                                                     |
| Maximum number of TF gene copies, excluding the signal                             | 19                                                                                   |                                |                                                                     |

<sup>1</sup> Parameters in bold can be altered by mutation, and the table shows the distributions from which their initial values are sampled. Estimation of  $N_{e\_sat}$  is described in the Methods; estimation of the other parameters is described in the Supplementary Text (Sections 1, 2 – 7, and 8).

<sup>2</sup> Same units as the parameter values. Parentheses mean the parameter cannot take the boundary values; square brackets mean it can. We also use these bounds to constrain mutation (see Section 9).

<sup>3</sup> The uniform distribution is denoted  $U(\text{min}, \text{max})$ .

<sup>4</sup> The normal distribution is denoted  $N(\text{mean}, \text{SD})$ .

**Table S2. Mutation rates and effect sizes**

| <b>Mutation</b>                                   | <b>Relative rate</b>                         | <b>Effect of mutation<sup>[1]</sup></b>      |
|---------------------------------------------------|----------------------------------------------|----------------------------------------------|
| Single nucleotide substitution                    | $5.25 \times 10^{-8}$ per gene               |                                              |
| Gene deletion                                     | $1.5 \times 10^{-7}$ per gene <sup>[2]</sup> |                                              |
| Gene duplication                                  | $1.5 \times 10^{-7}$ per gene <sup>[2]</sup> |                                              |
| Mutation to consensus sequence of a TF            | $3.5 \times 10^{-9}$ per gene                |                                              |
| Mutation to TF identity (activator vs. repressor) | $3.5 \times 10^{-9}$ per gene                |                                              |
| Mutation to $K_d(0)$                              | $3.5 \times 10^{-9}$ per gene                | $k = 0.5, \mu = -5^{[2]}, \sigma = 0.776$    |
| Mutation to $L$                                   | $1.2 \times 10^{-11}$ per codon              |                                              |
| Mutation to $r_{protein\_syn}$                    | $9.5 \times 10^{-12}$ per codon              | $k = 0.5, \mu = 0.021^{[2]}, \sigma = 0.760$ |
| Mutation to $r_{protein\_deg}$                    | $9.5 \times 10^{-12}$ per codon              | $k = 0.5, \mu = -1.88, \sigma = 0.739$       |
| Mutation to $r_{Act\_to\_Int}$                    | $9.5 \times 10^{-12}$ per codon              | $k = 0.5, \mu = 1.57^{[2]}, \sigma = 0.773$  |
| Mutation to $r_{mRNA\_deg}$                       | $9.5 \times 10^{-12}$ per codon              | $k = 0.5, \mu = -1.19, \sigma = 0.396$       |

24 <sup>1</sup> Mutation to these quantitative rates takes the form  $\log_{10} x' = \log_{10} x + \text{Normal}(k(\mu - \log_{10} x), \sigma)$ , where  $x$  is the  
 25 original value of the rate and  $x'$  is the value after mutation. See Section 9 for details.

26 <sup>2</sup> The value of this parameter is different during burn-in. See Section 9 for details.

27

|                                | Probability that mutation of this type is accepted, given it occurs |                       | Probability that an accepted mutation is of this type, given that it is accepted |                       |
|--------------------------------|---------------------------------------------------------------------|-----------------------|----------------------------------------------------------------------------------|-----------------------|
|                                | First 1000 evol. steps                                              | Last 1000 evol. steps | First 1000 evol. steps                                                           | Last 1000 evol. steps |
| <b>Substitution</b>            | 0.34 ± 0.01                                                         | 0.35 ± 0.00           | 0.180 ± 0.005                                                                    | 0.213 ± 0.008         |
| <b>Deletion</b>                | 0.27 ± 0.01                                                         | 0.21 ± 0.01           | 0.360 ± 0.003                                                                    | 0.345 ± 0.005         |
| <b>Duplication</b>             | 0.34 ± 0.01                                                         | 0.32 ± 0.01           | 0.368 ± 0.003                                                                    | 0.343 ± 0.005         |
| <b>TF recognition seq.</b>     | 0.30 ± 0.02                                                         | 0.19 ± 0.02           | 0.009 ± 0.001                                                                    | 0.005 ± 0.000         |
| <i>r<sub>Act_to_Int</sub></i>  | 0.33 ± 0.02                                                         | 0.25 ± 0.01           | 0.012 ± 0.001                                                                    | 0.010 ± 0.001         |
| <i>r<sub>mRNA_deg</sub></i>    | 0.34 ± 0.02                                                         | 0.27 ± 0.01           | 0.014 ± 0.001                                                                    | 0.016 ± 0.002         |
| <i>r<sub>protein_syn</sub></i> | 0.32 ± 0.02                                                         | 0.23 ± 0.01           | 0.013 ± 0.001                                                                    | 0.013 ± 0.001         |
| <i>r<sub>protein_deg</sub></i> | 0.35 ± 0.01                                                         | 0.26 ± 0.01           | 0.014 ± 0.001                                                                    | 0.015 ± 0.002         |
| <b>K<sub>d</sub>(0)</b>        | 0.28 ± 0.02                                                         | 0.21 ± 0.02           | 0.006 ± 0.000                                                                    | 0.005 ± 0.001         |
| <b>TF identity</b>             | 0.29 ± 0.01                                                         | 0.29 ± 0.02           | 0.008 ± 0.000                                                                    | 0.008 ± 0.001         |
| <b>Locus length</b>            | 0.33 ± 0.01                                                         | 0.36 ± 0.01           | 0.017 ± 0.001                                                                    | 0.026 ± 0.002         |

28

29 **Table S3. Summary of mutations that replaced the resident genotype.** Data is shown as mean  
30 ± SE over the 45 evolutionary replicates under selection for filtering out a spurious signal, with  
31 the signal allowed to regulate the effector directly. Without selection, each mutation would  
32 have probability 50% of replacing the resident; selection reduces this to around one in three at  
33 the beginning of the simulation, down to around one in four at the end. This high rate of  
34 accepting mutations after fitness has plateaued suggests significant nearly neutral evolution, i.e.  
35 that slightly deleterious mutations fix and are then compensated for. The estimated selection  
36 coefficient need only be 10<sup>-8</sup> for a mutant to replace the resident, which can be easily occur for a  
37 slightly deleterious mutation through the error in fitness estimation (see Evolution Simulation in  
38 the main text). Single nucleotide substitutions are particularly prone to nearly neutral evolution,  
39 whereas changes to the consensus sequence recognized by a TF are under stronger stabilizing  
40 selection. Deletion and duplication mutations are the most common forms of substitution not  
41 because they are more likely to be accepted, but because they occur at higher mutation rates.

42

|                     | Signal      |             | TFs         |             | Effector    |             |
|---------------------|-------------|-------------|-------------|-------------|-------------|-------------|
|                     | $V_n / V_s$ | $M_s / M_n$ | $V_n / V_s$ | $M_s / M_n$ | $V_n / V_s$ | $M_s / M_n$ |
| $r_{Act\_to\_Int}$  | NA          | NA          | 0.89        | 0.18        | 8.26        | 0.13        |
| $r_{mRNA\_deg}$     | NA          | NA          | 2.09        | 0.98        | 13.4        | 2.55        |
| $r_{protein\_syn}$  | NA          | NA          | 1.51        | 8.03        | 43.1        | 62.4        |
| $r_{protein\_deg}$  | NA          | NA          | 1.28        | 0.56        | 7.23        | 12.5        |
| $K_d(0)$            | 0.68        | 0.002       | 0.67        | 0.009       | NA          | NA          |
| <b>Locus length</b> | NA          | NA          | 1.01        | 0.72        | 2.07        | 0.79        |

43

44 **Table S4. Evolutionary constraint on parameters in AND-gated C1-FFLs.** Adaptive AND-gated  
45 C1-FFLs are taken from the 25 high-fitness replicates evolved for filtering out a spurious signal,  
46 where the signal directly regulates the effector. For each replicate, we sample one of the last  
47 10,000 evolutionary time steps, and then sample one AND-gated C1-FFL in that genotype,  
48 should there be more than one (or resample a time step for that replicate, if there are none).  
49 We then take the variance  $V_s$  of each C1-FFL parameter value across the 25 replicates. We  
50 repeat this sampling process 100 times (using the same 25 replicates) and take the mean in  
51 order to obtain a better estimator of the variance in each parameter value. We compare this by  
52 a comparable variance  $V_n$  given no selection. We obtain these from 30 evolutionary replicates  
53 under no selection (from **Fig. 6**), sampling parameter values from the signal, from one TF gene  
54 copy, and from one effector gene, without the requirement for C1-FFL presence. Variances are  
55 calculated for log-transformed parameter values, except for locus length. For locus length, we  
56 use the coefficient of variation rather than variance, i.e. we divide both variances by the square  
57 of the average locus length. The table also shows the how the parameter values  $M_s$  in adaptive  
58 AND-gated C1-FFLs differ from the expected value  $M_n$  given no selection.  $M_s$  and  $M_n$  are  
59 calculated as arithmetic means for locus length and as geometric means for all other  
60 parameters. The variance ratio is greater than 1 (indicating constraint), for all parameters except  
61  $K_d(0)$ , where the ratio of mean parameter values indicates that  $K_d(0)$  is nevertheless subject to  
62 strong directional selection. Effectors are more constrained than TFs, likely because the former  
63 are less redundant, having evolved fewer gene copies (4.7 on average for effectors vs. 8.6 for  
64 TFs). High degradation rates of effector mRNA and protein suggest selection to shorten the  
65 impact of transient expression in response to a short spurious signal (**Fig. S2**). High degradation  
66 rates of effector mRNA and protein are also seen in **Tables S5** and **S6**.

|                     | Signal    |           | Fast TFs  |           | Slow TFs  |           | Effector  |           |
|---------------------|-----------|-----------|-----------|-----------|-----------|-----------|-----------|-----------|
|                     | $V_n/V_s$ | $M_s/M_n$ | $V_n/V_s$ | $M_s/M_n$ | $V_n/V_s$ | $M_s/M_n$ | $V_n/V_s$ | $M_s/M_n$ |
| $r_{Act\_to\_Int}$  | NA        | NA        | 1.49      | 0.44      | 1.15      | 0.18      | 6.64      | 0.1       |
| $r_{mRNA\_deg}$     | NA        | NA        | 5.27      | 8.21      | 1.07      | 0.81      | 7.99      | 2.34      |
| $r_{protein\_syn}$  | NA        | NA        | 2.10      | 16.2      | 1.09      | 4.96      | 139       | 57.8      |
| $r_{protein\_deg}$  | NA        | NA        | 12.5      | 45.3      | 1.53      | 0.99      | 25.7      | 11.3      |
| $K_d(0)$            | 0.65      | 0.005     | 0.30      | 0.004     | 0.18      | 0.007     | NA        | NA        |
| <b>Locus length</b> | NA        | NA        | 3.43      | 0.47      | 3.40      | 0.47      | 5.97      | 0.74      |

67

68 **Table S5. Evolutionary constraint on parameters in isolated AND-gated diamonds.**  $V_n$ ,  $V_s$ ,  $M_n$ ,

69 and  $M_s$  are defined in the same way as in **Table S4**, and are calculated from 18 high-fitness

70 evolutionary replicates (**Fig. 7B**) in which isolated AND-gated diamonds occur in at least 100 of

71 the last 10,000 evolutionary steps. Because they occur at low rates, we sample 50 times per

72 evolutionary replicate, instead of 100 times as in **Tables S4** and **S6**. There is more constraint on

73 fast TFs than on slow TFs. The fast TFs usually have more gene copies than the slow TFs,

74 therefore redundancy is not the reason for this difference in constraint. As seen for the C1-FFLs

75 in **Table S4**, effectors are more constrained than either TF,  $K_d(0)$  shows strong selection for high

76 affinity combined with high variance, and effectors evolve rapid degradation. Fast TFs exhibit

77 not just fast protein degradation (which was used for their identification), but also fast mRNA

78 degradation.

|                     | Signal    |           | Signal-regulated TFs |           | TF-regulated TFs |           | Effector  |           |
|---------------------|-----------|-----------|----------------------|-----------|------------------|-----------|-----------|-----------|
|                     | $V_n/V_s$ | $M_s/M_n$ | $V_n/V_s$            | $M_s/M_n$ | $V_n/V_s$        | $M_s/M_n$ | $V_n/V_s$ | $M_s/M_n$ |
| $r_{Act\_to\_Int}$  | NA        | NA        | 2.16                 | 0.33      | 1.03             | 0.26      | 6.81      | 0.13      |
| $r_{mRNA\_deg}$     | NA        | NA        | 10.8                 | 8.5       | 1.40             | 0.74      | 12.4      | 2.36      |
| $r_{protein\_syn}$  | NA        | NA        | 4.34                 | 24.9      | 2.35             | 9.83      | 119       | 58.6      |
| $r_{protein\_deg}$  | NA        | NA        | 73.6                 | 49.4      | 1.50             | 0.34      | 34.1      | 9.92      |
| $K_d(\mathbf{0})$   | 0.51      | 0.005     | 0.29                 | 0.009     | 0.24             | 0.002     | NA        | NA        |
| <b>Locus length</b> | NA        | NA        | 2.52                 | 0.71      | 2.45             | 0.71      | 3.35      | 0.73      |

79

80 **Table S6. Evolutionary constraint on parameters in isolated AND-gated C1-FFLs.**  $V_n$ ,  $V_s$ ,  $M_n$ , and

81  $M_s$  are defined in the same way as in **Table S4**, and are calculated from 12 high-fitness

82 evolutionary replicates (**Fig. 7B**) evolved when the signal cannot directly regulate the effector,

83 and in which isolated AND-gated C1-FFLs occur in at least 1,000 out of the last 10,000

84 evolutionary steps. Note that the signal-regulated TFs, which are identified via network

85 topology, also have high protein degradation rates, as is used to identify their fast TF

86 counterparts in diamonds – they can thus be seen as a kind of fast TF. Consistent with results on

87 C1-FFLs when direct regulation is allowed (**Table S4**) and results on isolated AND-gated

88 diamonds (**Table S5**), effectors are more constrained than signal-regulated (fast) TFs, which are

89 more constrained than TF-regulated (slow) TFs, despite an opposite trend in gene copy number.

90 Note that selection promotes fast mRNA and protein degradation in fast TFs, but promotes slow

91 degradation of slow TFs; this result is also found more weakly in **Table S5**.

92

93 **Supplementary Figures**

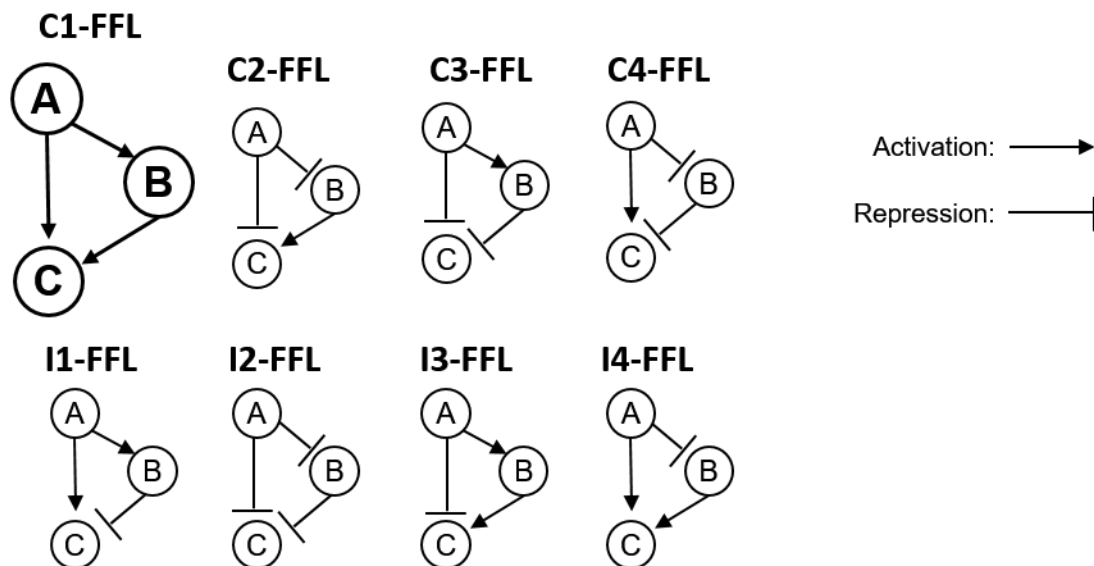

94

95 **Fig. S1. Feed-forward loops come in eight subtypes.** TF A and TF B can activate (indicated by  
96 arrows) or repress (indicated by bars) expression of the effector C as well as other TFs. Auto-  
97 regulation is allowed, but not shown. Following Milo et al. (2002), we exclude the case in which  
98 A and B regulate one another, rather than treating this case as two overlapping FFLs. C stands  
99 for coherent and I for incoherent.



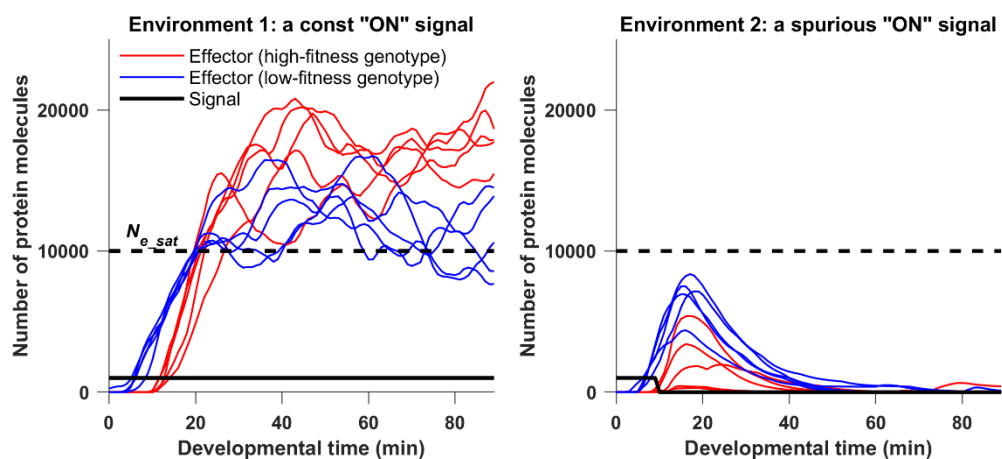

100

101 **Fig. S2 Examples of evolved phenotypes under selection for filtering out a short spurious**  
102 **signal.** The figure shows trajectories of the effector protein in one randomly chosen high-fitness  
103 replicate (red) and one randomly chosen low-fitness replicate (blue), as defined in **Fig. 4A**. The  
104 genotype of the final evolutionary step is used, and other genotypes were confirmed to behave  
105 similarly. Each genotype is illustrated by 5 replicate developmental simulations in each of the  
106 two environments. The high-fitness genotype has a longer delay followed by more rapid  
107 response given a consistent signal, with this longer delay reducing but not eliminating effector  
108 expression given a short spurious signal. The signal is allowed to directly regulate the effector in  
109 these simulations. The burn-in period is not shown, with developmental time zero  
110 corresponding to the moment the signal is turned on. Among developmental replicates of the  
111 same genotype, the concentration at a given time usually has an approximately log-normal  
112 distribution, but in environment 2 the distribution has two modes after the spurious signal turns  
113 off. One mode corresponds to expression at the basal rate, the other to a burst of expression  
114 that has yet to turn off. Because of this bimodality, we plot sample trajectories rather than  
115 mean concentration over many replicates.

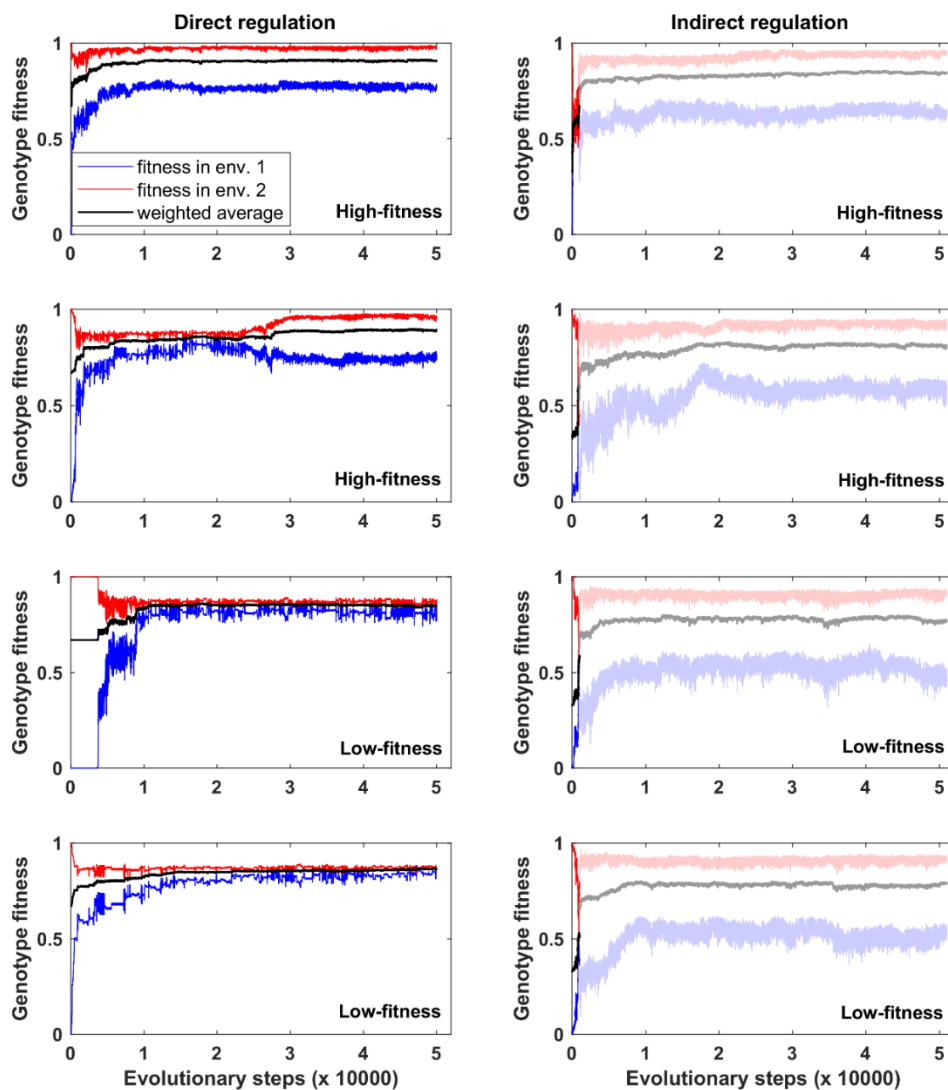

116

117 **Fig. S3 Representative fitness trajectories under selection to filter out short spurious signals.**

118 Left panels: The signal is allowed to directly regulate the effector genes. Panels 1 and 3  
119 correspond to the two genotypes shown in **Fig. S2**. Right panels: the signal cannot directly  
120 regulate the effector genes. Average fitness (black) is a weighted average of the blue and red  
121 trajectories, with environment 2 (where the signal is spurious) being considered twice as  
122 common as environment 1 (where the signal is sustained and real). When the signal cannot  
123 directly regulate the effector genes, evolutionary simulations begins with a burn-in phase that  
124 lasts 1000 evolutionary steps (see Evolutionary Simulation in the Main Text). We show the burn-  
125 in phase in undiluted color, and dilute color after burn-in. Most replicates quickly reach a stable  
126 fitness plateau (first and third rows). Certain replicates can be temporarily trapped at a low  
127 fitness plateau (second and third rows on the left).

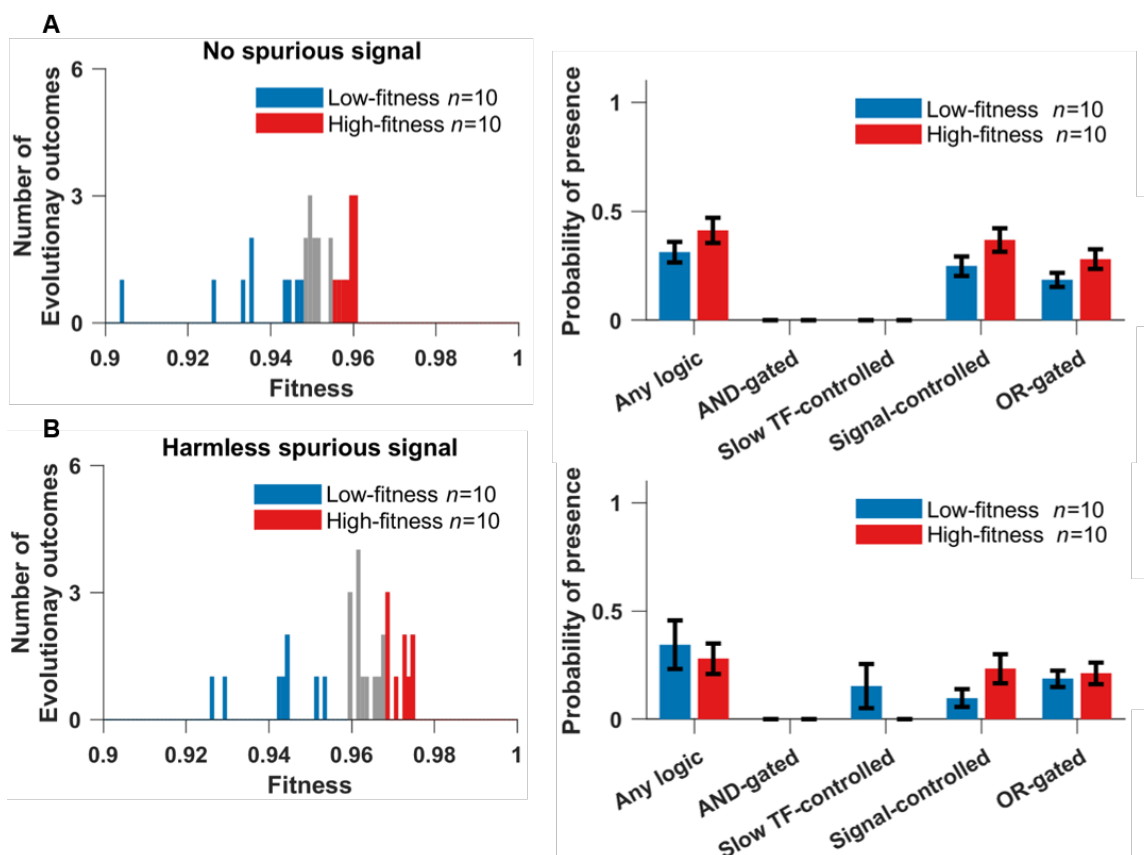

128

129 **Fig. S4 Genotypes evolved under control selective conditions: (A) “no spurious signal”, and (B)**

130 **“harmless spurious signal”.** There is no clear evidence of a multimodal distribution of fitness

131 outcomes among replicates (left), and C1-FFLs occur equally in the 10 genotypes of the highest

132 fitness vs. the 10 genotypes of the lowest fitness (right), and so the entire distribution (left) was

133 used to produce **Fig. 6**. Data are shown as mean $\pm$ SE over evolutionary replicates.

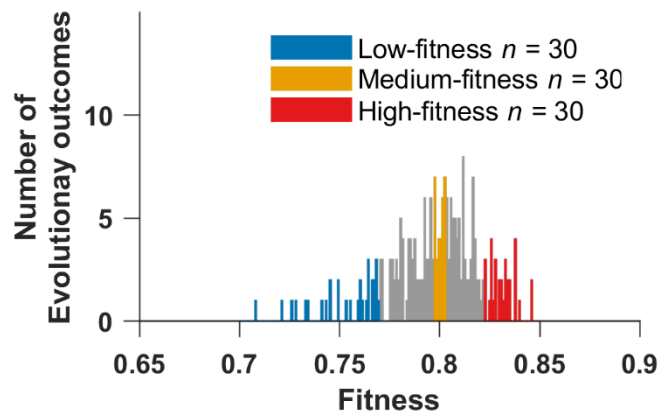

134

135 **Fig. S5 Fitness distribution of 258 evolutionary replicates under selection for filtering out short**

136 **spurious signals, when the signal cannot directly regulate the effector.** The fitness of a

137 replicate is the average genotype fitness over the last 10,000 evolutionary steps. Colors indicate

138 replicates analyzed elsewhere.

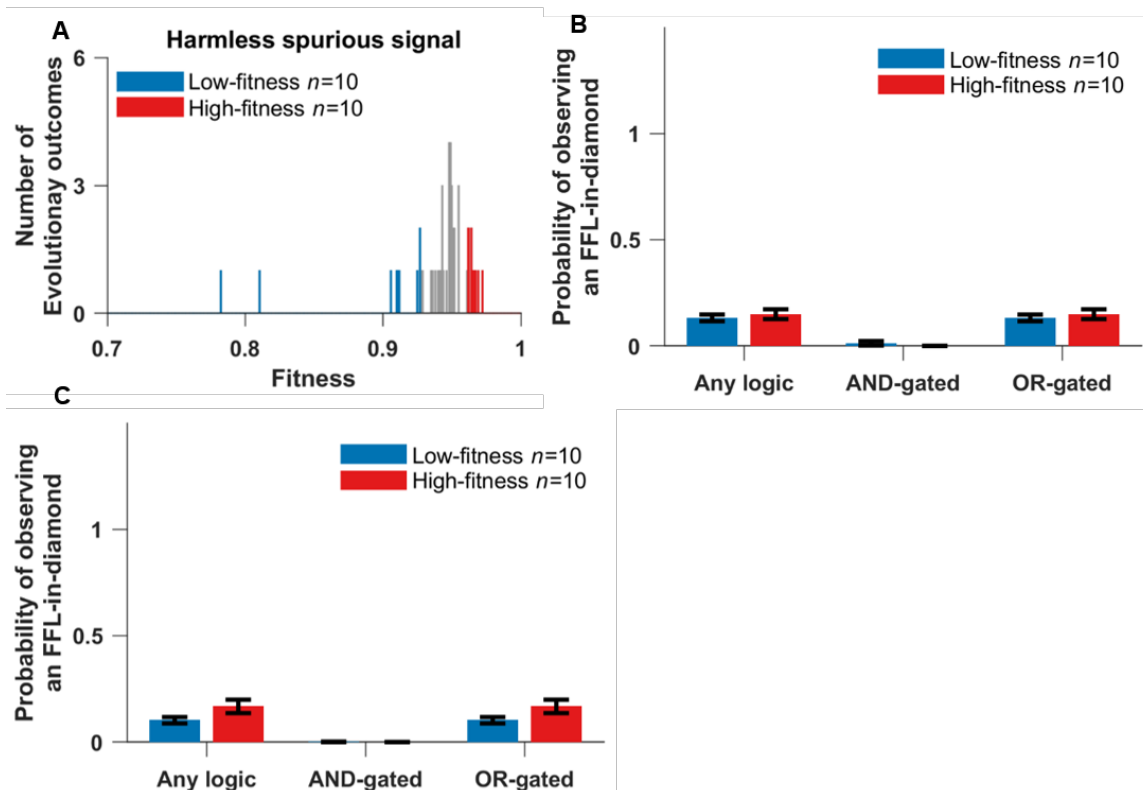

139

140 **Fig. S6 Evolution when responding to a spurious signal is harmless, when the signal is not**

141 **allowed to directly regulate the effector. (A)** Fitness distribution of 50 replicate simulations.

142 The occurrence of both **(B)** FFL-in-diamonds and **(C)** isolated diamonds were similar in the 10

143 genotypes with the highest fitness vs. in 10 genotypes with the lowest fitness. Weak (two-

144 mismatch) TFBSs are included when scoring motifs. Data are shown as mean $\pm$ SE over replicates.

145 Isolated C1-FFLs rarely evolve under this condition, therefore their occurrence is not plotted.

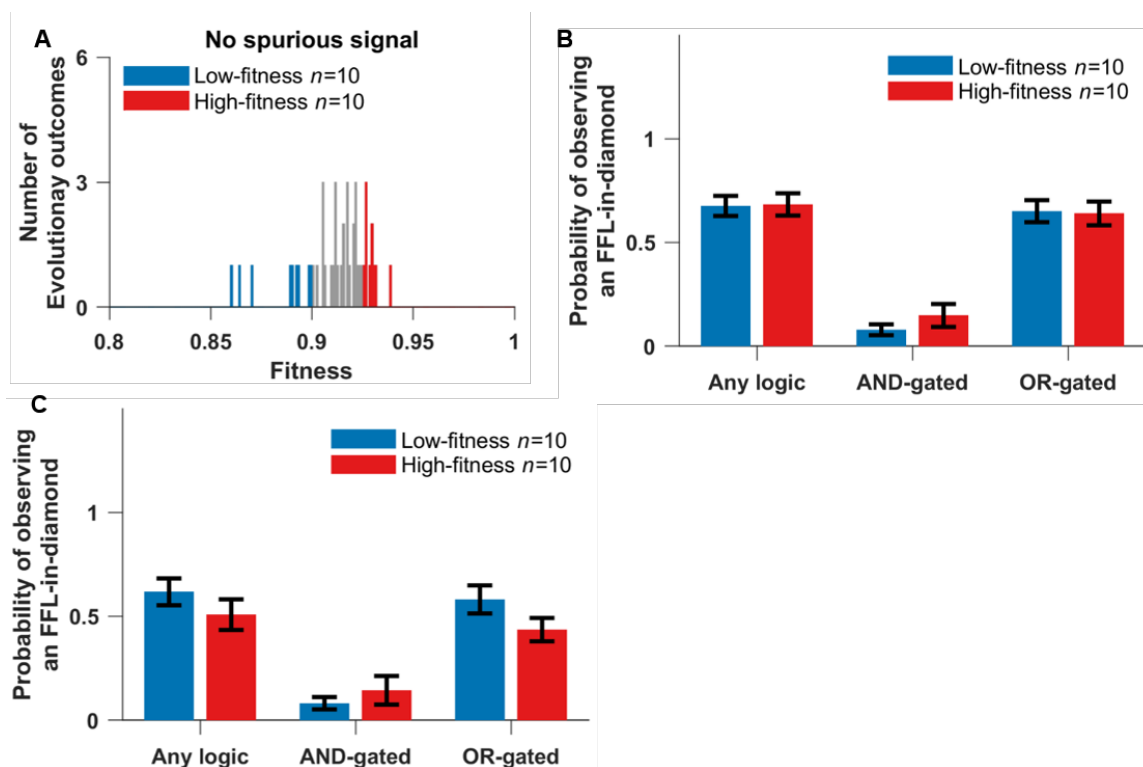

146

147 **Fig. S7 Evolution when there is no spurious signal, when the signal is not allowed to directly**  
148 **regulate the effector. (A)** Fitness distribution of 46 replicate simulations. The occurrence of both  
149 **(B)** FFL-in-diamonds and **(C)** isolated diamonds were similar in the 10 genotypes with the highest  
150 fitness vs. in the 10 genotypes with the lowest fitness. Weak (two-mismatch) TFBSs are included  
151 when scoring motifs. Data are shown as mean $\pm$ SE over replicates. Isolated C1-FFLs rarely evolve  
152 under this condition, therefore their occurrence is not plotted.

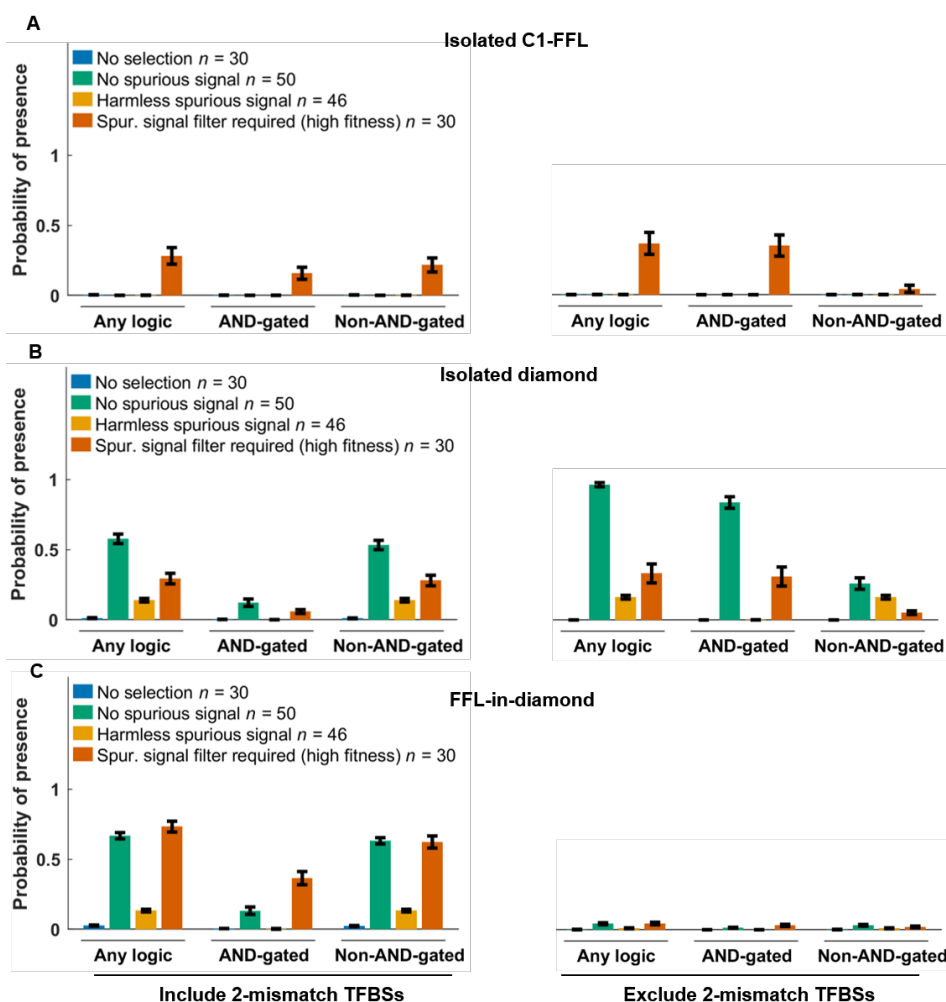

153 **Fig. S8 Selection for filtering out a short spurious signal is the primary way to evolve AND-**  
 154 **gated C1-FFLs (A), but AND-gated isolated diamonds also evolve in the absence of spurious**  
 155 **signals (B).** The signal is not allowed to directly regulate the effector, and the right panels of **(A)**  
 156 **and (B)** are identical to **Fig. 10**. When scoring motifs, we either include (left) or exclude (right) all  
 157 two-mismatch TFBSs in the cis-regulatory sequences of intermediate TF genes and effector  
 158 genes. We excluded “no regulation” (**Fig. 2**) diamonds from the “Any logic” and “Non-AND-  
 159 gated” tallies in **(B)**; this was necessary because of their high occurrence due to duplication and  
 160 divergence of intermediate TFs. See Section 11 for the calculation of y-axis. Data are shown as  
 161 mean $\pm$ SE over evolutionary replicates.

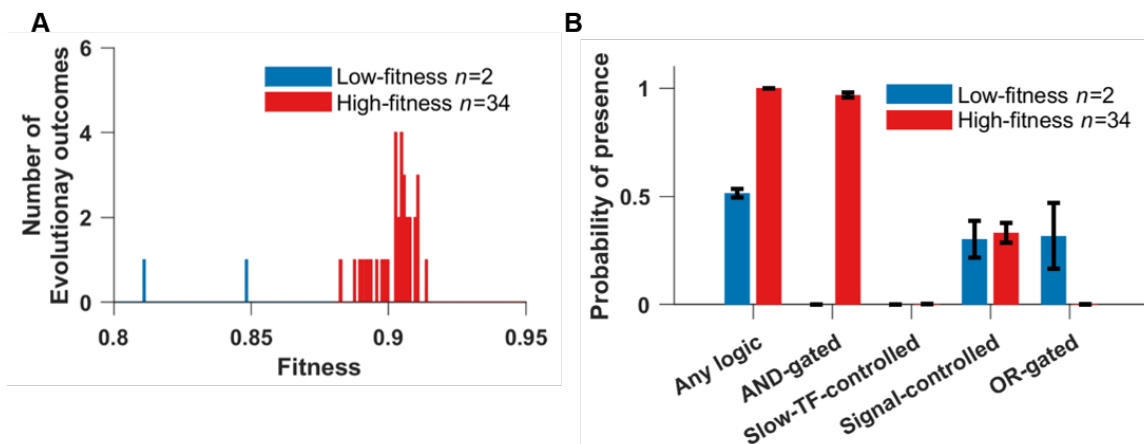

162

163 **Fig. S9** After removing cost of gene expression, AND-gated C1-FFLs are still associated with a  
164 **successful response to selection for filtering out a short spurious signal.** The signal can directly  
165 regulate the effector genes. **(A)** We arbitrarily divide the 36 replicate simulations into high-  
166 fitness (red) and low-fitness (blue) groups. **(B)** The high-fitness replicates still evolve AND-gated  
167 C1-FFLs. Bars are mean $\pm$ SE of the occurrence over replicate evolutionary simulations.



## 168 Supporting Text

### 169 1. TF binding

170 Transcription of each gene is controlled by TFBSs present within a 150-bp cis-regulatory region,  
171 corresponding to a typical yeast nucleosome-free region within a promoter (Yuan et al. 2005).  
172 The perfect TFBS for a typical yeast TF has information content equivalent to 13.8 bits  
173 (Wunderlich & Mirny 2009); this means that in a simplified model of binding where only one of  
174 the four nucleotides is a good match at each site, ~7 bp are recognized as an optimal consensus  
175 binding site. Maerkl & Quake (2007) reported that the TFBSs of two yeast TFs, Pho4p and Cbf1p,  
176 can have up to 2 mismatched sites within their 6 bp consensus binding sequence, while still  
177 binding the TF above background levels (Maerkl & Quake 2007). Our model therefore tracks  
178 TFBSs with up to 2 mismatches. This low information content implies a higher density of TFBSs  
179 within our cis-regulatory regions than our algorithm was able to handle, so we instead assigned  
180 each TF an 8-bp consensus sequence. Two TFs cannot simultaneously occupy overlapping  
181 stretches (Fig. S10), which we assume extend beyond the recognition sequence to occupy a total  
182 of 14 bp (Zhu & Zhang 1999); this captures competitive binding. The consequences of hindrance  
183 between TFBSs for the regulation of effector gene expression are shown in **Fig. 2**.

184

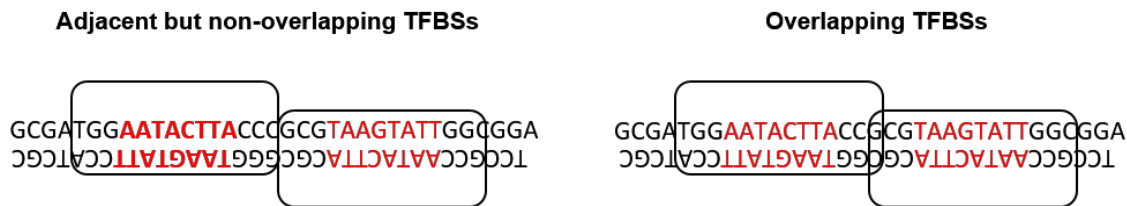

185

186 **Fig. S10** TFs (white boxes) recognize 8 bp (red) sites while occupying and thus excluding other  
187 TFs from a 14 bp long space. TFs are assumed to bind in either orientations (Sharon et al. 2012).  
188 The sequence on the left allows simultaneous binding but that on the right does not.

189

190 We denote the dissociation constant of a TFBS with  $m$  mismatches as  $K_d(m)$ . Sites with  $m > 3$   
191 mismatches are assumed to still bind at a background rate equal to  $m=3$  mismatches, with  
192 dissociation constant  $K_d(3) = 10^{-5}$  mole/liter (Maerkl & Quake 2007) for all TFs. We assume that  
193 each of the last three base pairs makes an equal and independent additive contribution  $\Delta G_{bp} < 0$   
194 to the binding energy (Benos et al. 2002): although not always true, this approximates average  
195 behavior well (Maerkl & Quake 2007). We ignore cooperativity in binding. Dissociation constants  
196 of eukaryotic TFs for perfect TFBSs can range from  $10^{-5}$  mole/liter (Park et al. 2004) to  $10^{-11}$   
197 mole/liter (Nalefski et al. 2006). We initialize each TF with its own value of  $\log_{10}(K_d(0))$  sampled  
198 from a uniform distribution between -6 and -9, with mutation capable of further expanding this  
199 range, subject to  $K_d(0) < 10^{-5}$  mole/liter. Substituting  $m=0$  and  $m=3$  into

200

$$201 \quad \Delta G_m = -RT \ln K_d(m) = \Delta G_0 - \min(m, 3) \Delta G_{bp},$$

202

203 we can solve for  $\Delta G_{bp}$  and  $\Delta G_0$ , and thus obtain  $K_d(1)$  and  $K_d(2)$  (the dissociation constants for  
204 TFBS with one and two mismatches, respectively).

205

206 Because TFs bind non-specifically to DNA at a high background rate, each nucleosome-free  
207 stretch of 14 bp can be considered to be a non-specific binding site (NSBS). A haploid *S.*  
208 *cerevisiae* genome is 12 Mb, 80% of which is wrapped in nucleosomes (Lee et al. 2007), yielding  
209 approximately  $10^6$  potential non-specific binding sites (NSBSs). In a yeast nucleus of volume  
210  $3 \times 10^{-15}$  liters, the NSBS concentration is of order  $10^4$  mole/liter. To find the concentration of  
211 free TF [TF] in the nucleus given a total nucleic TF concentration of  $C_{TF}$ , we consider

212

213 
$$K_d = \frac{[\text{binding\_site}][\text{TF}]}{[\text{binding\_site} \cdot \text{TF}]}$$

214

215 in the context of NSBSs, substitute  $[\text{TF} \cdot \text{NSBS}]$  with  $C_{TF} - [\text{TF}]$ , and solve for

216

217 
$$[\text{TF}] = \frac{K_d(3)}{K_d(3) + [\text{NSBS}]} C_{TF} = \frac{10^{-5}}{10^{-5} + 10^{-4}} C_{TF} \approx 0.1 C_{TF}.$$

218

219 Thus, about 90% of total TFs are bound non-specifically, leaving about 10% free. The relatively

220 small number of specific TFBSs is not enough to significantly perturb the proportion of free TFs,

221 and so for the specific TFBSs with  $m < 3$  that are of interest in our model, we simply use  $\widehat{K}_d(m) =$

222  $10K_d(m)$  to account for the reduction in the amount of available TF due to non-specific binding.

223 We also convert  $\widehat{K}_d$  from the units of mole/liter in which  $K_d$  is estimated empirically to the more

224 convenient molecules/nucleus. The rescaling factor  $r$  for which  $\widehat{K}_d$  (in molecule/nucleus) =  $r\widehat{K}_d$

225 (in mole/liter) is  $3 \times 10^{-15}$  liter/nucleus  $\times 6.02 \times 10^{23}$  molecule/mole =  $1.8 \times 10^9$  molecule cell<sup>-1</sup> liter

226 mole<sup>-1</sup>. Taken together,  $\widehat{K}_d$  (molecule/nucleus) =  $10rK_d$  (mole/liter), where the factor 10 accounts

227 for non-specific TF binding.

228

## 229 **2. TF occupancy**

230 Here we calculate the probability that there are  $A$  activators and  $R$  repressors bound to a given

231 cis-regulatory region at a given moment in developmental time. First we note that if we consider

232 TF  $i$  binding to TFBS  $j$  in isolation from all other TFs and TFBSs, Eq. S1 gives us probability of

233 being bound:

234

235 
$$P_b(j) = 1 - P_u(j) = \frac{C_i}{\widehat{K}_d + C_i}. \quad (\text{S1})$$

236

237 Let  $P_{A,R}^{(n)}$  be a term proportional (for a given value of  $n$ ) to the combined probability of all binding  
 238 configurations in which exactly  $A$  activators and  $R$  repressors are bound to the first  $n$  binding  
 239 sites along the cis-regulatory sequence. We calculate  $P_{A,R}^{(n)}$  recursively, considering one  
 240 additional TFBS at each step. Note that if two different TFs bind to exactly the same location on  
 241 a cis-regulatory region, we treat this as two TFBSs, not as one, and treat first one and then the  
 242 other in our recursive algorithm.

243

244 Consider the case where the  $(n+1)^{\text{th}}$  binding site belongs to an activator. The case where this  
 245 activator is not bound contributes  $P_{A,R}^{(n)} P_u(n+1)$  to  $P_{A,R}^{(n+1)}$ . If it is bound, then we must also  
 246 take into account that the  $(n+1)^{\text{th}}$  binding site overlaps (partially or completely) with the last  
 247  $H \geq 0$  sites, and so contributes  $P_{A-1,R}^{(n-H)} P_b(n+1) \prod_{j=n-H+1}^n P_u(j)$ . Taken together,

248

$$249 \quad P_{A,R}^{(n+1)} = P_{A,R}^{(n)} P_u(n+1) + P_{A-1,R}^{(n-H)} P_b(n+1) \prod_{j=n-H+1}^n P_u(j).$$

250

251 Similarly, if the  $(n+1)^{\text{th}}$  site belongs to a repressor, we have

252

$$253 \quad P_{A,R}^{(n+1)} = P_{A,R}^{(n)} P_u(n+1) + P_{A,R-1}^{(n-H)} P_b(n+1) \prod_{j=n-H+1}^n P_u(j).$$

254

255 By definition,  $P_{A,R}^{(n)} = 0$  for binding configurations that are impossible, e.g. those with negative  $A$   
 256 or negative  $R$ . We initialize the recursion at  $n = 0$ , where the only valid binding configuration is

257 for  $A = R = 0$ , i.e.  $P_{0,0}^{(0)} = 1$ . At  $n = 1$ ,  $P_{0,0}^{(1)} \propto P_u(1)$ , and if the binding site belongs to an activator,

258  $P_{1,0}^{(1)} \propto P_b(1)$ ; otherwise,  $P_{0,1}^{(1)} \propto P_b(1)$ . For  $N = 1$ , the two probabilities sum to 1 and

259 normalization is unnecessary. For higher values of  $N = N_A + N_R$  TFBSs, we normalize  $P_{A,R}^{(N)}$  at the  
260 end of the recursion by dividing by  $\sum_{A=0}^{N_A} \sum_{R=0}^{N_R} P_{A,R}^{(N)}$  to get the probability of binding  
261 configurations that include exactly  $A$  activators and  $R$  repressors.

262

### 263 3. $r_{Act\_to\_Int}$

264 Transcription initiation over an interval of time  $r_{transc\_init}$  is proportional to the proportion of time  
265 spent in the Active state. Assuming a steady state between Repressed, Intermediate, and Active  
266 states, as a function of current TF concentrations, we have:

267

$$268 \frac{r_{transc\_init}}{r_{max\_transc\_init}} = \frac{r_{Int\_to\_Act}}{r_{Int\_to\_Act} + r_{Act\_to\_Int}} P_{Int\_or\_Act}, \quad (S2)$$

269

270 where  $P_{Int\_or\_Act}$  is the probability a gene is at Intermediate or Active. We set  $r_{max\_transc\_init}$  (the rate  
271 of transcription given 100% Active state) to  $6.75 \text{ min}^{-1}$ , based on the corresponding rate when a  
272 model of the *PHO5* promoter is fit to data (Brown et al. 2013). In this model fit, the  
273 constitutively expressed *PHO5* promoter is free of nucleosomes 80% of the time, i.e.  $P_{Int\_or\_Act} =$   
274 0.8. We take these two values as universal for constitutively expressed genes, and assume that  
275 variation in  $r_{Act\_to\_Int}$  is responsible for variation in  $r_{transc\_init}$ . To identify a set of constitutively  
276 expressed genes, we identified 225 genes that have mRNA production rate of at least 0.5  
277 molecule  $\text{min}^{-1}$  from genome-wide measurements (Pelechano et al. 2010); this threshold  
278 corresponds to low H2A.Z occupancy (Guillemette et al. 2005). We set  $r_{transc\_init}$  to the production  
279 rate of mRNA of these 225 genes, and solve for gene-specific  $r_{Act\_to\_Int}$  from Eq. S2. We fit the  
280 solutions to a log-normal distribution and arrive at  $10^{N(1.27, 0.226)} \text{ min}^{-1}$ .

281

282 To initialize values of  $r_{Act\_to\_Int}$  for each gene, we sample from this distribution. We also set lower  
283 and upper bounds for allowable values; if either the initial sample or subsequent mutation put  
284  $r_{Act\_to\_Int}$  beyond these bounds, we set the value of  $r_{Act\_to\_Int}$  to equal to boundary value. We set  
285 the lower bound for  $r_{Act\_to\_Int}$  at  $0.59 \text{ min}^{-1}$ , half the minimum of the values inferred from the set  
286 of 225 genes. To set an upper bound, we use the low H2A.Z occupancy bound of  $r_{transc\_init} = 0.5$ ,  
287 which gives a solution of  $32.34 \text{ min}^{-1}$ ; we double this to set the upper bound as  $64.7 \text{ min}^{-1}$ .

288

#### 289 **4. Transcription delay times**

290 Yeast protein lengths fit a log-normal distribution of  $10^{N(2.568, 0.34)}$  amino acids (from the  
291 Saccharomyces Genome Database (SGD Project), excluding mitochondrial proteins). We sample  
292 ORF length  $L$  from this distribution. To constrain the values of  $L$ , we set a lower bound of 50  
293 amino acids and an upper bound of 5000 amino acids; the longest protein in SGD is 4910 amino  
294 acids. If either initialization or mutation put  $L$  beyond these bounds, we set the value of  $L$  to the  
295 boundary value.

296

297 With an mRNA elongation rate of 600 codon/min (Larson et al. 2011; Hocine et al. 2013), it takes  
298  $L / 600$  minutes to transcribe the ORF of an mRNA. Also including time for transcribing UTRs and  
299 for transcription termination, and ignoring introns for simplicity, it takes 290 seconds to  
300 complete transcription of the yeast *GLT1* gene (Larson et al. 2011), whose ORF is 6.4kb. Putting  
301 the two together, we infer that transcribing the UTRs and terminating transcription takes  
302 around 1 minute for *GLT1*. Generalizing to assume that transcribing UTRs and terminating  
303 transcription takes exactly 1 minute for all genes, producing an mRNA from a gene of length  $L$   
304 takes  $1 + L / 600$  minutes.

305

306 **5. Translation delay times and  $r_{protein\_syn}$**

307 We model a second delay between the completion of a transcript and the production of the first  
308 protein from it. The delay comes from a combination of translation initiation and elongation; it  
309 ends when the mRNA is fully loaded with ribosomes all the way through to the stop codon and  
310 the first protein is produced. We ignore the time required for mRNA splicing; introns are rare in  
311 yeast (Dujon 1996). mRNA transportation from nucleus to cytosol, which is likely diffusion-  
312 limited (Niño et al. 2013; Smith et al. 2015), is fast even in mammalian cells (Mor et al. 2010) let  
313 alone much smaller yeast cells, and the time it takes is also ignored. The median time in yeast  
314 for initiating translation is 0.5 minute (Table 1 in Siwiak et al. 2010), and the genomic average  
315 peptide elongation rate is 330 codon/min (Siwiak et al. 2010). After an mRNA is produced, we  
316 therefore wait for  $0.5 + L / 330$  minutes, and then model protein production as continuous at a  
317 gene-specific rate  $r_{protein\_syn}$ .

318

319 To calculate  $r_{protein\_syn}$ , we combine the gene-specific ribosome densities  $D$  along the mRNAs and  
320 the gene-specific peptide elongation rates  $E$ , both measured in yeast (Siwiak et al. 2010). The  
321 values of  $DE$  across yeast genes fit the log-normal distribution  $10^{N(0.322, 0.416)}$  molecule mRNA<sup>-1</sup>  
322 min<sup>-1</sup>; we initialize  $r_{protein\_syn}$  for each gene by sampling from this distribution. We set the lower  
323 bound for  $r_{protein\_syn}$  at half the minimum observed value of  $DE$  ( $4.5 \times 10^{-3}$  molecule mRNA<sup>-1</sup> min<sup>-1</sup>).  
324 The upper bound corresponds to an mRNA fully occupied by rapidly moving ribosomes. Each  
325 ribosome occupies about 10 codons (Siwiak et al. 2010), and the peptide elongation rate can be  
326 as high as 614 codon/min (Waldron et al. 1977). If ribosomes are packed closely together at 10  
327 codons apart, a protein comes off the end of production in the time taken to elongate 10  
328 codons, i.e. proteins are produced at 61.4 molecules per minute. If either initialization or  
329 mutation put  $r_{protein\_syn}$  beyond these bounds, we set the value of  $r_{protein\_syn}$  to the boundary value.

330

## 331 **6. mRNA and protein decay rates**

332 We fit the log-normal distribution  $10^{N(-1.49, 0.267)}$   $\text{min}^{-1}$  to yeast mRNA degradation rates (Wang et  
333 al. 2002), and initialize the mRNA degradation rate  $r_{mRNA\_deg}$  for each gene by sampling from this  
334 distribution. We set lower and upper bounds for  $r_{mRNA\_deg}$  at half the minimum and twice the  
335 maximum observed values ( $7.5 \times 10^{-4} \text{ min}^{-1}$  and  $0.54 \text{ min}^{-1}$ ), respectively. If either initialization or  
336 mutation put  $r_{mRNA\_deg}$  beyond these bounds, we set the value of  $r_{mRNA\_deg}$  to the boundary value.

337

338 Expressing the estimated half-lives of yeast proteins (Belle et al. 2006) in terms of protein  
339 degradation rates, they fit the log-normal distribution  $10^{N(-1.88, 0.56)}$   $\text{min}^{-1}$ ; we initialize gene-  
340 specific protein degradation rates  $r_{protein\_deg}$  by sampling from this distribution. We ignore the  
341 additional reduction in protein concentration due to dilution as the cell grows and thus  
342 increases in volume. We set lower and upper bounds for  $r_{protein\_deg}$  at half the minimum and twice  
343 the maximum observed degradation rate ( $3.0 \times 10^{-6} \text{ min}^{-1}$  and  $0.69 \text{ min}^{-1}$ ), respectively. If  
344 either initialization or mutation put  $r_{protein\_deg}$  beyond these bounds, we set the value of  $r_{protein\_deg}$   
345 to the boundary value.

346

## 347 **7. Simulation of gene expression**

348 Our algorithm is part-stochastic, part-deterministic. We use a Gillespie algorithm (Gillespie  
349 1977) to simulate stochastic transitions between Repressed, Intermediate, and Active chromatin  
350 states, and to simulate transcription initiation and mRNA decay events. We refer to these as  
351 “Gillespie events”. The completion of transcription to produce a complete mRNA, and  
352 subsequent ribosomal loading onto the mRNA, are referred to as “fixed events” (they require  
353 fixed times of  $1 + L / 600$  minutes and  $0.5 + L / 330$  minutes, respectively). Scheduled changes in



354 the strength of the external signal are also fixed events. Protein production and degradation are  
355 described deterministically with ODEs, and updated frequently in order to recalculate TF  
356 concentrations and hence chromatin transition rates. Updates occur at the time of Gillespie and  
357 fixed events, and also in between.

358

359 The total rate of all Gillespie events is

360

$$361 \quad r_{total} = \sum_i^{Rep} r_{Rep\_to\_Int\_i} + \sum_i^{Int} (r_{Int\_to\_Rep\_i} + r_{Int\_to\_Act\_i}) + \sum_i^{Act} (r_{Act\_to\_Int\_i} + r_{transc}) +$$
$$362 \quad \sum_i^{genes} r_{mRNA\_deg\_i} N_{mRNA\_i},$$

363

364

365 where *Rep*, *Int*, and *Act* are the numbers of gene copies in our haploid model that are in the  
366 Repressed, Intermediate, and Active chromatin states, respectively, and  $N_{mRNA\_i}$  is the number of  
367 completely transcribed mRNA molecules from gene *i*. We only simulate degradation of full  
368 transcribed mRNA, and not that of mRNA that are still being transcribed, because the latter are  
369 already captured implicitly by  $r_{max\_transc\_init}$ , which is based on mRNAs that complete transcription  
370 (Brown et al. 2013). Once an mRNA finishes transcription, it is subjected to degradation  
371 regardless of whether ribosome loading is complete.

372

373 The waiting time  $\Delta t$  before the next Gillespie event is

374

$$375 \quad \Delta t = \frac{x}{r_{total}},$$

376

377 where  $x$  is random number drawn from an exponential distribution with mean 1. Which Gillespie  
 378 event takes place next is sampled only if a different update does not happen first. If a fixed  
 379 event is scheduled to happen first at  $\Delta t_1 < \Delta t$ , we advance time by  $\Delta t_1$ , update the state of the  
 380 cell, and calculate a new  $r_{total}'$ . Since the cellular activity has been going on with the old rate  $r_{total}$   
 381 for  $\Delta t_1$ , the remaining “labor” required to trigger the Gillespie event planned earlier is reduced.  
 382 The new waiting time,  $\Delta t'$ , to trigger the planned Gillespie event is

$$384 \quad \Delta t' = \frac{x - r_{total} \Delta t_1}{r_{total}'}$$

385  
 386 Gene duplication creates  $n \geq 1$  genes producing the same protein, where each copy  $i$  might  
 387 have diverged in their production rate  $r_{protein\_syn\_i}$  and degradation rate  $r_{protein\_deg\_i}$ . Complete  
 388 proteins are produced continuously once an mRNA molecule is fully loaded with ribosomes,  
 389 which occurs  $0.5 + L / 330$  minutes after transcription is complete – the concentration of such  
 390 molecules is denoted  $N_{mRNA\_aft\_delay\_i}(t)$ . Total protein concentration obeys:

$$392 \quad N'_{protein}(t) = \sum_i^n (r_{protein\_syn\_i} N_{mRNA\_aft\_delay\_i}(t) - r_{protein\_deg\_i} N_{protein\_i}(t)). \quad (S3)$$

393  
 394 Protein concentrations are updated using a closed-form integral of Eq. S3

$$396 \quad N_{protein}(t_1) = \sum_i^n \left( \frac{r_{protein\_syn\_i} N_{mRNA\_aft\_delay\_i}}{r_{protein\_deg\_i}} + (N_{protein\_i}(t_0) - \right.$$

$$397 \quad \left. \frac{r_{protein\_syn\_i} N_{mRNA\_aft\_delay\_i}}{r_{protein\_deg\_i}}) e^{-r_{protein\_deg\_i}(t_1 - t_0)} \right) \quad (S4)$$

398

399 with this expression updated every time a Gillespie or fixed event at time  $t_1$  changes the value of

400  $N_{mRNA\_aft\_delay\_i}$ .

401

402 In between updates, values of  $P_A$ ,  $P_R$ ,  $P_{A\_no\_R}$ , and  $P_{notA\_no\_R}$ , and hence chromatin transition rates,

403 are calculated under the approximation of constant  $N_{protein}$ . Additional updates, above and

404 beyond fixed and Gillespie events, are performed in order to ensure that chromatin transition

405 rates do not change too dramatically from one update to the next. We use a target of  $D = 0.01$

406 for the amount of change tolerated in the values of  $P_A$ ,  $P_R$ ,  $P_{A\_no\_R}$ , and  $P_{notA\_no\_R}$ , in order to

407 schedule updates after time  $\Delta t^*$ , which are triggered when neither a Gillespie event nor a fixed

408 event occurs before this time has elapsed, i.e. when  $\Delta t^* < \Delta t_1$  and  $\Delta t^* < \Delta t$ .

409

410 There is the greatest potential for large changes after an update that changes the value of

411  $N_{mRNA\_aft\_delay\_i}$ . In this case, we use Eq. S1 to solve for the time interval for which the probability

412 that TF  $i$  would be bound to a single perfect and non-overlapping TFBS would change by  $D$ , by

413 choosing  $\Delta t^* > 0$  that satisfies

414

$$415 \quad \left| \frac{N_i(t)}{N_i(t) + K_{d,i}^*(0)} - \frac{N_i(t + \Delta t^*)}{N_i(t + \Delta t^*) + K_{d,i}^*(0)} \right| = D. \quad (S5)$$

416

417 A solution for  $\Delta t$  may not exist, e.g. if the concentration of TF  $i$  is decreasing but  $P_b(t_2) < D$ . In

418 such cases, we set  $\Delta t^*$  to infinity.

419

420 When the previous update does not change any  $N_{mRNA\_aft\_delay\_i}$  values, then we modify  $\Delta t^*$

421 adaptively. Let  $d$  be the maximum of  $\Delta P_A$ ,  $\Delta P_R$ ,  $\Delta P_{A\_no\_R}$ , and  $\Delta P_{notA\_no\_R}$  during the last update. We

422 then schedule an update at

423

$$424 \quad \Delta t^{*l} = \frac{D}{d} \Delta t^*. \quad (S6)$$

425

426 After an update that changes the value of  $N_{mRNA\_aft\_delay\_i}$ , we use the smaller value from Eqs. S5  
427 and S6. These additional update times are discarded and recalculated when a Gillespie or fixed  
428 event occurs first.

429

430 In **Fig. S11**, we see that simulations rarely exceed our target of  $D=0.01$ , and do so only modestly.

431

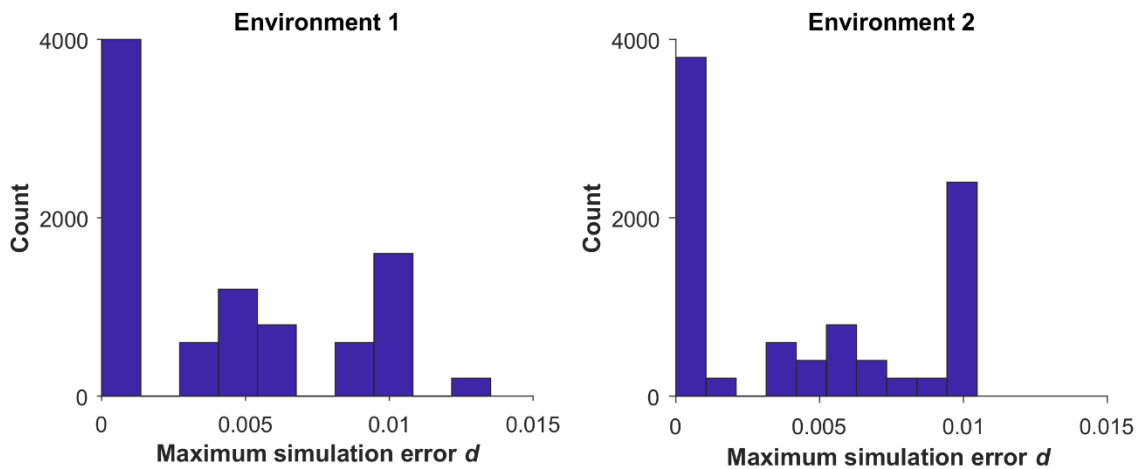

432

433 **Fig. S11 Our updating algorithm is able to limit simulation errors.** The distribution across 9,000  
434 simulations of the maximum value of  $d$  over the course of development. For each of the 45  
435 evolutionary replicates in **Fig. 4**, we run 200 simulations of development of the final evolved  
436 genotype. These genotypes were the outcome of evolution under selection for filtering out  
437 short spurious signals, in which direct regulation of the effector by the signal is not allowed. In  
438 environment 1 a genotype responds to a constant “ON” signal and in environment 2 it responds  
439 to a short spurious signal (**Fig. 3**).

440

## 441 8. Cost of gene expression

442 The cost of gene expression comes from some combination of the act of expression and from  
443 the presence of the resulting gene product. Yeast cells with plasmids carrying fast-degrading  
444 GFP had as much growth impairment as those carrying wild-type GFP (Fig. 3 of Kafri et al. 2016),  
445 suggesting that the former cost dominates. Universal costs stemming from the act of gene  
446 expression include the consumption of energy (Wagner 2005; Wagner 2007) and the  
447 opportunity cost of not using ribosomes to make other gene products (Scott et al. 2014). While  
448 some costs arise from transcription (Kafri et al. 2016), we simplify our model by attributing all of  
449 the cost of expression to the act of translation.

450

451 Kafri et al. (2016) reported that, in rich media, the growth rate of haploid yeast is reduced by  
452 about 1% when mCherry is expressed to about 2% of proteome. With  $b_{max} = 1$  giving the growth  
453 rate of the yeast when mCherry is not expressed, we have the cost of gene expression equal to  
454 0.01. Next, we estimate the production rate of mCherry in Kafri et al. (2016) by assuming that  
455 mCherry is in steady state between production and dilution due to cell division; fluorescent  
456 proteins tend to be stable such that degradation can be ignored (Snapp 2009). Ghaemmaghani  
457 et al. (2003) estimated that a haploid yeast cell contains about  $5 \times 10^7$  protein molecules, 2% of  
458 which are now mCherry. Over a 90 minute cell cycle in Kafri et al. (2016), about  $5 \times 10^5$  mCherry  
459 molecule per cell need to be expressed in order to double in numbers. This yields a production  
460 rate of about  $5 \times 10^3$  mCherry molecules per minute per cell. Because the total cost of gene  
461 expression is 0.01, the cost at a protein production rate of one mCherry molecule per minute  
462 per cell,  $c_{transl}$ , is  $2 \times 10^{-6}$ . Long genes should be more expensive to express than short ones; for  
463 a gene of length  $L$ , we assume its cost of expression is  $c_{transl}L / 370$ , where 370 is the geometric  
464 mean length of a yeast protein as described above in Section 4. Results using the length of

465 mCherry instead, i.e. a slightly higher cost of expression of  $c_{transl}L / 236$ , are unlikely to be

466 significantly different.

467

468 The overall cost of gene expression at time  $t$ ,  $C(t)$  is:

469

470 
$$C(t) = c_{transl} \left( \sum_1^n \frac{L_i}{10^{2.568}} r_{transl\_init\_i} N_{mRNA\_aft\_delay\_i}(t) + \right.$$

471 
$$\left. \sum_1^n \frac{L_i}{10^{2.568}} \frac{r_{transl\_init\_i}}{2} N_{mRNA\_during\_delay\_i}(t) \right).$$

472

473 The second term represents transcripts that are on average half-loaded with ribosomes, and

474 hence experiencing on average half the cost of translation. We integrate  $C(t)$  within segments of

475 constant  $C(t)$  to obtain the overall cost of gene expression during a simulation.

476

## 477 9. Mutation

478 Because we use an origin-fixation approach, only the relative and not the absolute values of our

479 mutation rates matter. In *S. cerevisiae*, the rates of small indels and of single nucleotide

480 substitutions have been estimated as  $0.2 \times 10^{-10}$  per base pair and  $3.3 \times 10^{-10}$  per base pair,

481 respectively (Lynch et al. 2008). Thus, cis-regulatory sequences are primarily shaped by single

482 nucleotide substitutions. We do not model small indels in the cis-regulatory sequence, but

483 increase the single nucleotide substitution up to  $3.5 \times 10^{-10}$  per base pair to compensate. This

484 corresponds to a rate of  $5.25 \times 10^{-8}$  per 150 bp cis-regulatory sequence.

485

486 Lynch et al. (2008) also report a rate of gene duplication of  $1.5 \times 10^{-6}$  per gene and of deletion of

487  $1.3 \times 10^{-6}$  per gene (not including non-deletion-based loss of function mutations). These values

488 turned out to swamp the evolution of TFBSs and hence significantly slow down our simulations,

489 so we chose values 10-fold lower, making both gene duplication and gene deletion occur at rate  
490  $1.5 \times 10^{-7}$  per gene. This preserves their numerical excess but reduces its magnitude.

491

492 Our model contains 8 gene-specific parameters, namely  $L$ ,  $r_{Act\_to\_Int}$ ,  $r_{protein\_deg}$ ,  $r_{protein\_syn}$ ,  $r_{mRNA\_deg}$ ,  
493 the  $K_d(0)$  of a TF, whether a TF is an activator vs. repressor, and the consensus binding sequence  
494 of a TF. We assume mutations to  $L$  are caused by relatively neutral small indels, which we  
495 assume to be 20% of all small indels; mutation to  $L$  therefore occurs at rate  $1.2 \times 10^{-11}$  per codon,  
496 i.e.  $1.2 \times 10^{-11}L$  for a gene of length  $L$ . For  $r_{Act\_to\_Int}$ , we assume that it is altered by 10% of all the  
497 point mutations (single nucleotide substitution and small indels) to the core promoter of a gene.  
498 The length of a core promoter is about 100 bp and is relatively constant among genes (Roy &  
499 Singer 2015), yielding a mutation rate of  $r_{Act\_to\_Int}$  of  $3.5 \times 10^{-9}$  per gene.

500

501 The remaining 6 gene-specific parameter mutation rates are parameterized with lower accuracy  
502 due to lack to data; the principal decision is which to make dependent vs. independent of gene  
503 length. TF binding to DNA depends on particular peptide motifs whose length is likely  
504 independent of TF length, therefore we make mutation rates independent of gene length for  
505 mutations to  $K_d(0)$ , to the consensus binding sequence of a TF, and to the activating vs  
506 repressing identity of a TF. We set the rate of each of the three mutation types to  $3.5 \times 10^{-9}$  per  
507 gene. In contrast, because the stability of an mRNA mainly depends on its codon usage (Cheng  
508 et al. 2017) and thus more codons means more opportunities for change, we assume the rate of  
509 mutation to  $r_{mRNA\_deg}$  does depend on gene length, as do mutations to protein stability  $r_{protein\_deg}$ .  
510  $r_{protein\_syn}$  is determined by the density of ribosomes on mRNA and the elongation rate of  
511 ribosomes, and therefore is affected both by ribosome loading speed and by slow spots forming  
512 queues in the mRNA. Ribosome loading often relies on the 5'UTR of mRNA (Hinnebusch 2011),

513 and 5'UTR length is positively correlated with ORF length (Tuller et al. 2009). Slow-spots in  
514 mRNA can be due to secondary structure or to suboptimal codons, therefore are also more  
515 likely to appear by mutation to long mRNAs, so we assume the rate of mutation to  $r_{protein\_syn}$   
516 depends on gene length. We set the mutation rates of  $r_{protein\_deg}$ ,  $r_{protein\_syn}$ , and  $r_{mRNA\_deg}$  each to  
517  $9.5 \times 10^{-12}$  per codon; in other words, each mutation rate is  $3.5 \times 10^{-9}$  for a yeast gene of average  
518 length (on a log-scale)  $10^{2.568} = 370$  codons.

519

520  $r_{Act\_to\_Int}$ ,  $r_{protein\_syn}$ ,  $K_d(0)$ ,  $r_{protein\_deg}$ , and  $r_{mRNA\_deg}$  evolve as quantitative traits. They are assumed to  
521 have, in the absence of selection, a log-normal stationary distribution with mean  $\mu$  and standard  
522 deviation  $\sigma$ , with values estimated below and listed in **Table S2**. Denote the values of a  
523 parameter as  $x$  before mutation and  $x'$  after mutation; mutation takes the form:

524

$$525 \quad \log_{10}x' = \log_{10}x + \text{Normal}(k(\mu - \log_{10}x), \sigma), \quad (S7)$$

526

527 where  $k$  controls the speed of regressing back to the stationary distribution; we set  $k = 0.5$  for all  
528 5 parameters. To set values of  $\mu$ , central tendency estimates of these five values (from **Table S1**)  
529 are adjusted according to our expectations about mutation bias. We assume a mutation bias  
530 toward faster mRNA degradation  $r_{mRNA\_deg}$ , faster  $r_{Act\_to\_Int}$  (Decker & Hinton 2013; Roy & Singer  
531 2015), slower translation initiation  $r_{protein\_syn}$  (Hinnebusch 2011), and larger  $K_d(0)$ . We assume  
532 that the observed log-normal means of  $r_{mRNA\_deg}$ ,  $r_{protein\_syn}$ , and  $r_{Act\_to\_Int}$  differ by 2-fold from the  
533 mean expected from mutational bias; for example, the mean of  $\log_{10}(r_{mRNA\_deg})$  is -1.49, so the  
534 value of  $\mu$  for  $r_{mRNA\_deg}$  is  $-1.49 + \log_{10}(2) = -1.19$ . We assume a larger bias for  $K_d(0)$ , namely that  
535 mutation is likely to reduce the affinity of a TF for a TFBS down to non-specific levels. Thus, we  
536 set  $\mu = \log_{10}(K_d(3)) = -5$  for  $K_d(0)$ ; note that in this case  $\mu$  is equal to one of the boundary values,



537 which will be hit far more often than during the evolution of other parameters. We assume that  
538 the observed central tendency estimate of protein stability does not depart from mutational  
539 equilibrium, therefore the value of  $\mu$  for  $r_{protein\_deg}$  is the mean of  $\log_{10}(r_{protein\_deg}) = -1.88$ .

540

541 The value of  $\sigma$  controls mutational effect size. We set the value of  $\sigma$  such that 1% of mutational  
542 changes from  $x=10^\mu$  go beyond the boundary values, for simplicity approximating by considering  
543 only the closer of the two boundary values on a log scale, i.e. we solve Eq. S8 for  $\sigma$ :

544

$$545 \quad \begin{cases} P(\mu + \text{Normal}(0, \sigma) \geq \log_{10}U) = 0.01, & \text{if the upper bound } U \text{ is closer} \\ P(\mu + \text{Normal}(0, \sigma) \leq \log_{10}L) = 0.01, & \text{if the lower bound } L \text{ is closer} \end{cases} \quad (S8)$$

546

547 For example, the upper and the lower bounds of  $r_{mRNA\_deg}$  are  $0.54 \text{ min}^{-1}$  and  $7.5 \times 10^{-4} \text{ min}^{-1}$ ; on a  
548 log-scale, the upper bound is closer to  $10^\mu = 10^{-1.19} \text{ min}^{-1}$ . Plugging these values in Eq. S8 and  
549 solving for  $\sigma$ , we have  $\sigma = 0.396$ . We set the values of  $\sigma$  for  $r_{protein\_syn}$ , and  $r_{protein\_deg}$  in the same  
550 way. However for  $r_{Act\_to\_Int}$ ,  $\sigma$  is set according to the lower bound, even though it is the more  
551 distant from  $10^\mu$ , because otherwise a stable preinitiation complex will evolve too rarely. Under  
552 this high mutational variance, evolutionary outcomes at the two bounds are still only observed  
553 5% of the time. For  $K_d(0)$ , because its upper bound is equal to  $10^\mu$ , we set  $\sigma$  to 0.776, such that  
554 1% of mutations can change the values of  $K_d(0)$  by 100-fold or more.

555

556 Mutant values of  $L$ ,  $r_{Act\_to\_Int}$ ,  $r_{protein\_syn}$ ,  $r_{protein\_deg}$ , and  $r_{mRNA\_deg}$  are constrained by the same  
557 bounds that constrain the initial values of these parameters (Sections 3-6). If a mutation  
558 increases the value of any of these 5 parameters to beyond the corresponding upper bound, we  
559 set the mutant value to the upper bound; similarly for a mutant value that is smaller than the  
560 lower bound of the corresponding parameter. For mutation to  $K_d(0)$ , we resample if  $x' \geq K_d(3)$ ,

561 because otherwise the mutation effectively “deletes” the TF by reducing its affinity to non-  
562 specific levels.

563

## 564 **10. Burn-in evolutionary simulation conditions**

565 When the signal is not allowed to regulate the effector genes directly, most simulations under  
566 selection either to filter out short spurious signals or for simple signal recognition in the absence  
567 of spurious signals rapidly found a local optimal solution in which effector genes are never  
568 expressed. This local optimum exists in part because we assume that the environment in which  
569 the effector is deleterious is twice as common as the environment in which it is beneficial (**Fig.**  
570 **3**). When the signal is not allowed to directly turn on the effector, then to escape this local  
571 optimum, at least one activator must be induced by the signal and then induce the effector.  
572 Such activators are rare when genotypes are randomly initialized. Making matters worse,  
573 mutation tends to reduce expression after initialization (see Section 9).

574

575 To reduce the frequency of this problem, we added a burn-in stage to simulations in which the  
576 signal is not allowed to regulate the effector directly. During burn-in, we switch the frequencies  
577 of the two environments, so that selection to express the effector is stronger. We also change  
578 the mutational bias in  $r_{Act\_to\_Int}$ ,  $r_{protein\_syn}$ , and  $K_d(0)$  to favor higher expression and stronger  
579 binding. For  $r_{Act\_to\_Int}$  and  $r_{protein\_syn}$ , we use 0.1 instead of 0.01 as the tolerated fraction of  
580 extreme mutations in Eq. S8. For  $K_d(0)$ , we decrease  $\mu$  from -5 to -7.5, biasing mutation toward  
581 the mean value at which we initialize (**Table S1**). Evolving an activator that can reliably turn on  
582 the effector when the signal is “ON” primarily relies on forming strong binding sites and  
583 appropriate kinetic constants in expression, assisted by the change in mutational bias above. To  
584 better focus the simulations on sampling appropriate mutations during the burn-in phase, we

585 reduce the rate of gene duplication and the rate of deletion to  $5.25 \times 10^{-9}$  per gene, and limit  
586 the maximum number of TF genes to 9 and that of effector genes to 2. Each simulation is run  
587 under burn-in conditions for 1000 steps, after which normal model settings and selection  
588 conditions are restored. The same burn-in mutational settings are used for the control selection  
589 conditions (no selection, no spurious signal, and harmless spurious signal).

590

## 591 **11. Quantifying occurrence of network motifs**

592 Scoring the presence of a C1-FFL motif (e.g. **Fig. 4B**) or diamond motif (e.g. **Fig. 7**) is based on  
593 scoring whether TF  $x$  regulates gene  $y$ . Gene duplication and divergence complicate this scoring,  
594 because different gene copies might encode functionally identical proteins, but one copy of  
595 gene  $y$  might have a TFBS for TF  $x$  and the other might not. For the purpose of scoring motifs,  
596 our algorithm begins by simply treating each gene copy as though it were a unique gene.

597

598 Following Milo et al. (2002), a C1-FFL is scored if activating TF A can bind to the cis-regulatory  
599 sequence of activating TF B and to the effector, if B can also bind to that of the effector, and if B  
600 does not bind to that of A. Auto-regulation is allowed. We exclude C1-FFLs in which A and B  
601 encode the same TF or variants of the same TF. In the case of direct regulation, A can be the  
602 signal rather than a TF. C1-FFLs can then be subdivided into categories based on overlap  
603 between the TFBSs in the cis-regulatory region of the effector (**Fig. 2**).

604

605 A diamond is scored if two signal-regulated activating TFs, A and B, do not bind to each other's  
606 cis-regulatory region, but both bind to that of the effector. We allow auto-regulation and  
607 require A and B to not encode the same TF or variants of the same TF.

608

609 A FFL-in-diamond is scored if one signal-regulated activating TF A binds to the cis-regulatory  
610 region of another signal-regulated activating TF B, but B does not bind to that of A, and both A  
611 and B bind to that of the effector. Again, auto-regulation is allowed, and A and B must not  
612 encode the same TF or variants of the same TF.

613

614 Occurrence within one evolutionary replicate is calculated as the fraction of the last 10,000  
615 evolutionary steps in which at least one motif of the type of interest is present. The mean and  
616 standard error of this occurrence metric is then calculated across replicates.

617

## 618 **12. Perturbing network motifs**

619 In **Fig. 5** and **Fig. 9**, we add a TFBS to the cis-regulatory sequence of the effector gene, in order  
620 to destroy the AND-gate logic of an isolated C1-FFL or diamond. The new TFBS is chosen such  
621 that it does not overlap with any existing TFBSs, and has the same affinity as the strongest TFBS  
622 that is already present in the cis-regulatory sequence of the effector gene for the signal/fast TF  
623 (to convert from an AND-gate to signal-controlled/fast TF-controlled), or for the slow TF (to  
624 convert from an AND-gate to slow TF-controlled).

625

626 When a TRN has multiple AND-gated motifs of interest, we convert all of them. A perturbation  
627 can also affect the logic of other, potentially non-AND-gated motifs in the same TRN (e.g. **Fig.**  
628 **S12**), making it hard to attribute the fitness effect to the AND-gate logic of the targeted motif.  
629 For this reason, we perform the perturbation analysis not on a single potentially problematic  
630 genotype, but on the last 10,000 evolutionary steps of an evolutionary simulation. Within those  
631 10,000 related genotypes, we exclude those that also contain other motifs that might influence  
632 our results. For simulations where the signal is allowed to directly regulate the effector, this

633 means excluding those with non-AND-gated C1-FFLs. For simulations where the signal is not  
634 allowed to directly regulate the effector, we exclude genotypes with either AND-gated or non-  
635 AND-gated motifs other those of interest (e.g. if we intend to perturb AND-gated isolated C1-  
636 FFLs, we exclude genotypes that also contain either an AND-gated isolated diamond or a non-  
637 AND-gated C1-FFL). Both pre-perturbation fitness and post-perturbation fitness are averaged  
638 over the remaining genotypes. If no evolutionary step meets our requirement, we exclude the  
639 entire evolutionary simulation; this occurs only when the signal cannot directly regulate the  
640 effector genes.

641

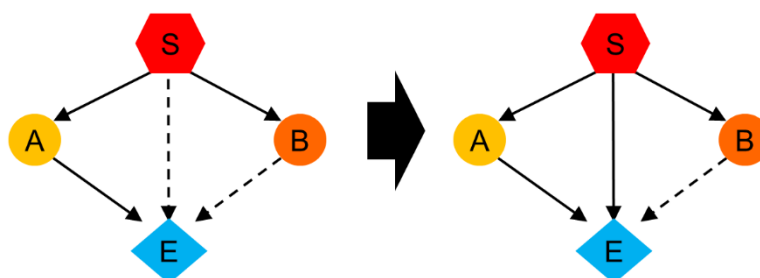

642

643 **Fig. S12 Examples of confounding motifs in perturbation analysis.** The TRN on the left contains  
644 a slow TF-controlled C1-FFL (S-B-E) and an AND-gated C1-FFL (S-C-E). To convert S-C-E into a  
645 signal-controlled C1-FFL, we need to add one TFBS for the signal to the cis-regulatory sequence  
646 of E. However, this change also makes S-B-E OR-gated, making it difficult to conclude whether it  
647 is the AND gate logic of S-B-E that matters for fitness.

## References

- 648 Belle, A, Tanay, A, Bitincka, L, Shamir, R, and O'Shea, EK. 2006. Quantification of protein half-  
649 lives in the budding yeast proteome. *PNAS* 103:13004-13009.
- 650 Benos, PV, Bulyk, ML, and Stormo, GD. 2002. Additivity in protein-DNA interactions: how good  
651 an approximation is it? *Nucleic Acids Res* 30:4442-4451.
- 652 Brown, CR, Mao, C, Falkovskaia, E, Jurica, MS, and Boeger, H. 2013. Linking Stochastic  
653 Fluctuations in Chromatin Structure and Gene Expression. *PLoS Biol* 11:e1001621.
- 654 Cheng, J, Maier, KC, Avsec, Ž, Rus, P, and Gagneur, J. 2017. Cis-regulatory elements explain most  
655 of the mRNA stability variation across genes in yeast. *RNA* 23:1648-1659.
- 656 Decker, KB, and Hinton, DM. 2013. Transcription Regulation at the Core: Similarities Among  
657 Bacterial, Archaeal, and Eukaryotic RNA Polymerases. *Annu Rev Microbiol* 67:113-139.
- 658 Dujon, B. 1996. The yeast genome project: what did we learn? *Trends Genet* 12:263-270.
- 659 Ghaemmaghami, S, Huh, W-K, Bower, K, Howson, RW, Belle, A, Dephoure, N, O'Shea, EK, and  
660 Weissman, JS. 2003. Global analysis of protein expression in yeast. *Nature* 425:737-741.
- 661 Gillespie, DT. 1977. Exact stochastic simulation of coupled chemical reactions. *J Phys Chem*  
662 81:2340-2361.
- 663 Guillemette, B, Bataille, AR, Gevry, N, Adam, M, Blanchette, M, Robert, F, and Gaudreau, L.  
664 2005. Variant histone H2A.Z is globally localized to the promoters of inactive yeast  
665 genes and regulates nucleosome positioning. *PLoS Biol* 3:e384.
- 666 Hinnebusch, AG. 2011. Molecular Mechanism of Scanning and Start Codon Selection in  
667 Eukaryotes. *Microbiology and Molecular Biology Reviews* 75:434-467.
- 668 Hocine, S, Raymond, P, Zenklusen, D, Chao, JA, and Singer, RH. 2013. Single-molecule analysis of  
669 gene expression using two-color RNA labeling in live yeast. *Nature Methods* 10:119-121.

- 670 Kafri, M, Metzl-Raz, E, Jona, G, and Barkai, N. 2016. The Cost of Protein Production. *Cell Reports*  
671 14:22-31.
- 672 Katan-Khaykovich, Y, and Struhl, K. 2002. Dynamics of global histone acetylation and  
673 deacetylation in vivo: rapid restoration of normal histone acetylation status upon  
674 removal of activators and repressors. *Genes Dev* 16:743-52.
- 675 Larson, DR, Zenklusen, D, Wu, B, Chao, JA, and Singer, RH. 2011. Real-time observation of  
676 transcription initiation and elongation on an endogenous yeast gene. *Science* 332:475-  
677 478.
- 678 Lee, W, Tillo, D, Bray, N, Morse, RH, Davis, RW, Hughes, TR, and Nislow, C. 2007. A high-  
679 resolution atlas of nucleosome occupancy in yeast. *Nature Genet* 39:1235-44.
- 680 Lynch, M, Sung, W, Morris, K, Coffey, N, Landry, CR, Dopman, EB, Dickinson, WJ, Okamoto, K,  
681 Kulkarni, S, Hartl, DL, and Thomas, WK. 2008. A genome-wide view of the spectrum of  
682 spontaneous mutations in yeast. *Proc Natl Acad Sci USA* 105:9272-9277.
- 683 Maerkl, SJ, and Quake, SR. 2007. A Systems Approach to Measuring the Binding Energy  
684 Landscapes of Transcription Factors. *Science* 315:233-237.
- 685 Milo, R, Shen-Orr, S, Itzkovitz, S, Kashtan, N, Chklovskii, D, and Alon, U. 2002. Network motifs:  
686 Simple building blocks of complex networks. *Science* 298:824-827.
- 687 Mor, A, Suliman, S, Ben-Yishay, R, Yunger, S, Brody, Y, and Shav-Tal, Y. 2010. Dynamics of single  
688 mRNP nucleocytoplasmic transport and export through the nuclear pore in living cells.  
689 *Nature Cell Biol* 12:543-552.
- 690 Nalefski, EA, Nebelitsky, E, Lloyd, JA, and Gullans, SR. 2006. Single-molecule detection of  
691 transcription factor binding to DNA in real time: Specificity, equilibrium, and kinetic  
692 parameters. *Biochemistry* 45:13794-13806.

- 693 Niño, CA, Hérisant, L, Babour, A, and Dargemont, C. 2013. mRNA nuclear export in yeast.  
694 *Chemical Reviews* 113:8523-8545.
- 695 Park, S, Chung, S, Kim, KM, Jung, KC, Park, C, Hahm, ER, and Yang, CH. 2004. Determination of  
696 binding constant of transcription factor myc-max/max-max and E-box DNA: The effect of  
697 inhibitors on the binding. *Biochim Biophys Acta, Gen Subj* 1670:217-228.
- 698 Pelechano, V, Chávez, S, and Pérez-Ortín, JE. 2010. A Complete Set of Nascent Transcription  
699 Rates for Yeast Genes. *PLoS ONE* 5:e115560.
- 700 Roy, AL, and Singer, DS. 2015. Core promoters in transcription: old problem, new insights.  
701 *Trends Biochem Sci* 40:165-171.
- 702 Scott, M, Klumpp, S, Mateescu, EM, and Hwa, T. 2014. Emergence of robust growth laws from  
703 optimal regulation of ribosome synthesis. *Mol Syst Biol* 10:747.
- 704 SGD Project. <https://yeastmine.yeastgenome.org> accessed April 2, 2018.
- 705 Sharon, E, Kalma, Y, Sharp, A, Raveh-sadka, T, Levo, M, Zeevi, D, Keren, L, Yakhini, Z,  
706 Weinberger, A, and Segal, E. 2012. Articles Inferring gene regulatory logic from high-  
707 throughput measurements of thousands of systematically designed promoters. *Nature*  
708 *Biotechnol* 30:521-530.
- 709 Siwiak, M, Zielenkiewicz, P, Jacobson, A, Grebogi, C, and Kito, K. 2010. A Comprehensive,  
710 Quantitative, and Genome-Wide Model of Translation. *PLoS Comput Biol* 6:e1000865.
- 711 Smith, C, Lari, A, Derrer, CP, Ouwehand, A, Rossouw, A, Huisman, M, Dange, T, Hopman, M,  
712 Joseph, A, Zenklusen, D, Weis, K, Grunwald, D, and Montpetit, B. 2015. In vivo single-  
713 particle imaging of nuclear mRNA export in budding yeast demonstrates an essential  
714 role for Mex67p. *J Cell Biol* 211:1121-1130.
- 715 Snapp, EL. 2009. Fluorescent proteins: a cell biologist's user guide. *Trends in Cell Biology* 19:649-  
716 655.



- 717 Tuller, T, Ruppin, E, and Kupiec, M. 2009. Properties of untranslated regions of the *S. cerevisiae*  
718 genome. *BMC Genomics* 10:391.
- 719 Wagner, A. 2005. Energy constraints on the evolution of gene expression. *Mol Biol Evol* 22:1365-  
720 1374.
- 721 Wagner, A. 2007. Energy costs constrain the evolution of gene expression. *J Exp Zool Part B*  
722 308B:322-324.
- 723 Waldron, C, Jund, R, and Lacroute, F. 1977. Evidence for a high proportion of inactive ribosomes  
724 in slow-growing yeast cells. *Biochemical Journal* 168:409-415.
- 725 Wang, Y, Liu, CL, Storey, JD, Tibshirani, RJ, Herschlag, D, and Brown, PO. 2002. Precision and  
726 functional specificity in mRNA decay. *Proc Natl Acad Sci USA* 99:5860-5865.
- 727 Wunderlich, Z, and Mirny, LA. 2009. Different gene regulation strategies revealed by analysis of  
728 binding motifs. *Trends Genet* 25:434-440.
- 729 Yuan, GC, Liu, YJ, Dion, MF, Slack, MD, Wu, LF, Altschuler, SJ, and Rando, OJ. 2005. Genome-  
730 scale identification of nucleosome positions in *S. cerevisiae*. *Science* 309:626-630.
- 731 Zhu, J, and Zhang, MQ. 1999. SCPD: a promoter database of the yeast *Saccharomyces cerevisiae*.  
732 *Bioinformatics* 15:607-611.
